# Supplementary material for: Unraveling Binding Mechanism and Stability of Urease Inhibitors: A QM/MM MD Study
Source: MDPI journal article supplement (doi:10.3390/molecules28062697), 2023-03-16
Supplement: s1 [file s1]

Supplementary Materials

# Unraveling Binding Mechanism and Stability of Urease Inhibitors: A QM/MM MD Study

Shunya Suenaga <sup>1</sup>, Yu Takano <sup>2</sup> and Toru Saito <sup>2,\*</sup>

<sup>1</sup> Faculty of Information Sciences, Hiroshima City University, 3-4-1 Ozuka-Higashi, Asa-Minami-Ku, Hiroshima 731-3194, Japan

<sup>2</sup> Graduate School of Information Sciences, Hiroshima City University, 3-4-1 Ozuka-Higashi, Asa-Minami-Ku, Hiroshima 731-3194, Japan

\* Correspondence: tsaito@hiroshima-cu.ac.jp; Tel.: +81-82-830-1617

## Contents

**Section 1:** AHA-bound complexes ( $^1\text{RS}_{\text{QM}a}$  and  $^1\text{RS}_{\text{QM}b}$ ) (Figures S1) and the reaction mechanism of AHA inhibition process obtained from QM-only (UB3LYP-D3BJ) computations (Figure S2)

**Section 2:** HU-bound complexes ( $^2\text{RS}_{\text{QM}a}$  and  $^2\text{RS}_{\text{QM}b}$ ) (Figures S3) and the reaction mechanism of AHA inhibition process obtained from QM-only (UB3LYP-D3BJ) computations (Figure S4)

**Section 3:** The reaction mechanism of HU hydrolysis process obtained from QM-only (UB3LYP-D3BJ and GFN2-xTB) computations (Figure S5)

**Section 4:** Analysis of hydrogen bonds between inhibitors and Asp363 during QM/MM metadynamics simulation (Figure S6–S9)

**Section 5:** Results of classical MD simulations for inhibitor-bound complexes (Figures S10–S13)

**Section 6:** Cartesian coordinates for QM/MM MD equilibrated and QM-only optimized structures

### Section 1: AHA-bound complexes ( ${}^1\text{RS}_{\text{QM}a}$ and ${}^1\text{RS}_{\text{QM}b}$ ) and the reaction mechanism of AHA inhibition process obtained from QM-only (UB3LYP-D3BJ) computations

As shown in Figure S1, the UB3LYP-D3BJ/def2-SVP geometry optimizations using the truncated active-site (QM-only cluster) model defined in section 3.3 gave two different AHA-bound complexes ( ${}^1\text{RS}_{\text{QM}a}$  and  ${}^1\text{RS}_{\text{QM}b}$ ). In  ${}^1\text{RS}_{\text{QM}a}$ , AHA chelates Ni1 and its OH group forms a hydrogen bond with WB. On the other hand,  ${}^1\text{RS}_{\text{QM}b}$  binds to the dinickel center in a bidentate manner, with bond lengths of 2.26 and 2.34 Å between Ni1 and the carbonyl oxygen and Ni2 and hydroxylamine oxygens. The coordination modes of carboxylate ligands (Lys220\* and Asp363) are different from  ${}^1\text{RS}_{\text{QM}a}$  and  ${}^1\text{RS}_{\text{QM}}$ , and  ${}^1\text{RS}_{\text{QM}b}$  is 12.4 kcal/mol less stable than  ${}^1\text{RS}_{\text{QM}a}$ . Thus, we investigated the formation of AHA-inhibited complex starting with  ${}^1\text{RS}_{\text{QM}a}$ .

The reaction turns out to proceed via proton transfer from the hydroxylamine to WB, followed by the dissociation of the generated water molecule in line with the experimental suggestion (Figure S2). The formation of a reaction intermediate ( ${}^1\text{Int}_{\text{QM}}$ ) is found to be feasible requiring a small activation barrier of only 1.1 kcal/mol and to be slightly exothermic. However, we could not locate a proper transition state that corresponds to the dissociation of the bridging water molecule. We constructed an initial guess for a product complex in which the water molecule was manually moved away from the nickel ions. The geometry optimization led to  ${}^1\text{P}_{\text{QM}}$ , lying 5.1 kcal/mol above  $\text{RS}_{\text{QM}a}$ . These QM-only results indicate that the binding of AHA inhibitor is endothermic albeit with its high inhibitory activity established as a standard reference. Therefore, we conclude that the QM-only cluster approach is insufficient for the prediction of mechanisms of binding and inhibition of AHA, possibly due to lack of taking into account of the protein environment.

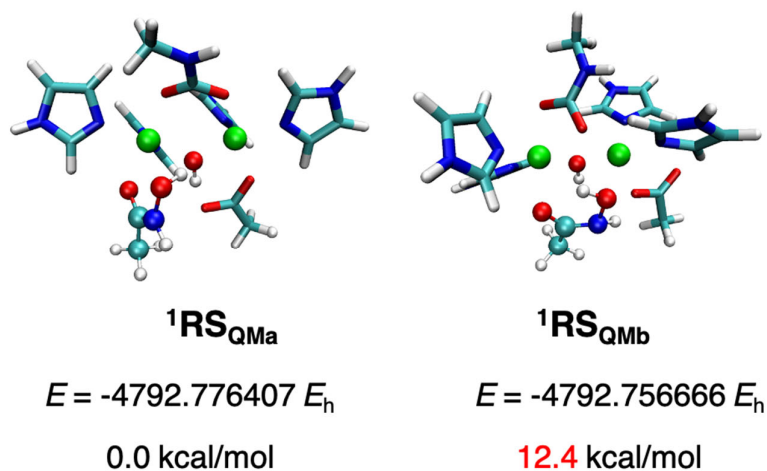

**Figure S1.** Two different AHA-bound complexes ( ${}^1\text{RS}_{\text{QM}a}$  and  ${}^1\text{RS}_{\text{QM}b}$ ) optimized at the UB3LYP-D3BJ/def2-SVP level of theory.

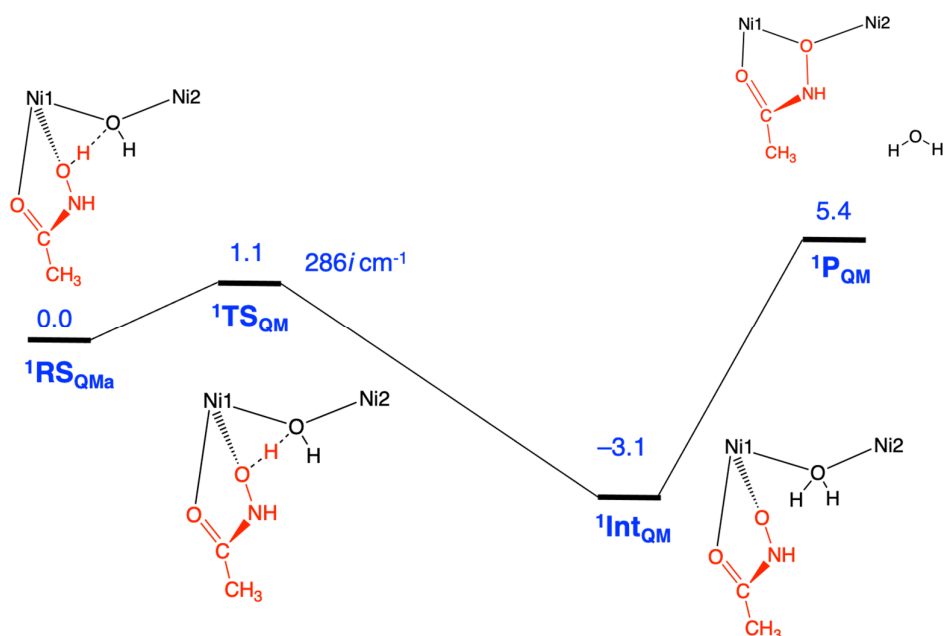

**Figure S2.** Potential energy profile (in kcal/mol) and illustrations of the transition state, intermediate and product structures corresponding to the inhibition process of AHA obtained at the UB3LYP-D3BJ/def2-SVP level of theory.

## Section 2: HU-bound complexes ( $^2\text{RS}_{\text{QMa}}$ and $^2\text{RS}_{\text{QMb}}$ ) and the reaction mechanism of AHA inhibition process obtained from QM-only (UB3LYP-D3BJ) computations

As shown in Figures S3 and S4, the UB3LYP-D3BJ calculations on the binding of HU inhibitor also highlight that QM-only cluster approach is not suitable for the prediction of mechanisms of binding and inhibition of HU.

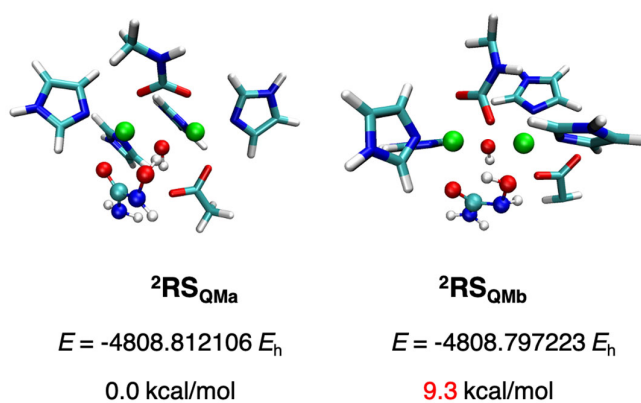

**Figure S3.** Two different HU-bound complexes ( $^2\text{RS}_{\text{QMa}}$  and  $^2\text{RS}_{\text{QMb}}$ ) optimized at the UB3LYP-D3BJ/def2-SVP level of theory.

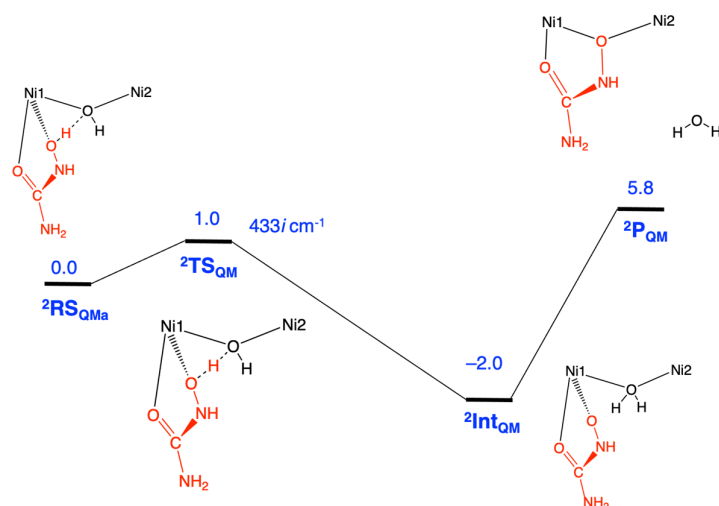

**Figure S4.** Potential energy profile (in kcal/mol) and illustrations of the transition state, intermediate and product structures corresponding to the inhibition process of HU obtained at the UB3LYP-D3BJ/def2-SVP level of theory.

### Section 3: Analysis of hydrogen bonds between inhibitors and Asp363 during QM/MM metadynamics simulation

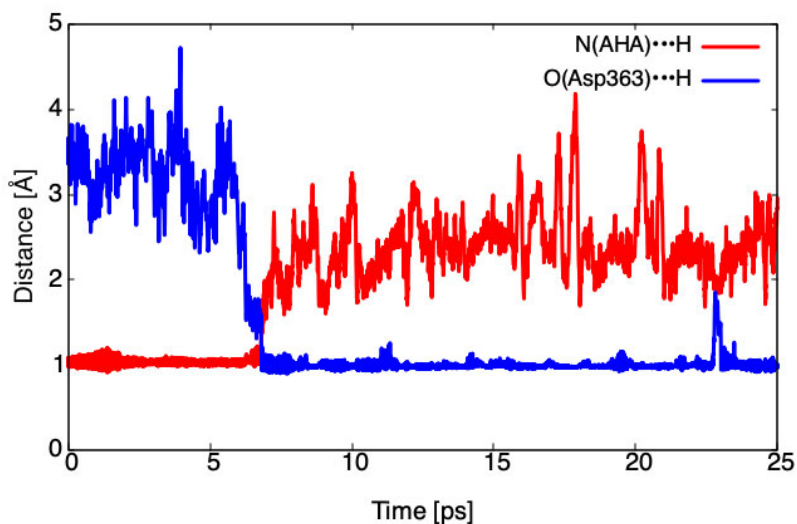

**Figure S5.** Selected hydrogen bond distances between N(AHA) and O(Asp363) during a 25 ps QM/MM metadynamics simulation.

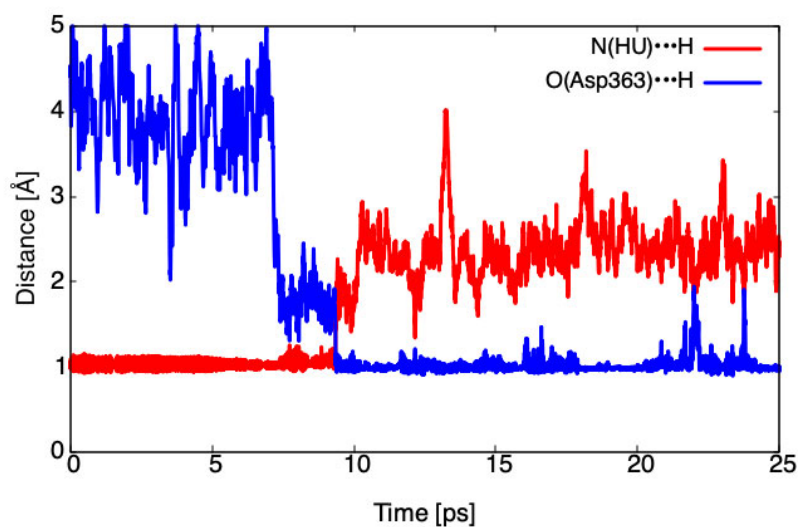

**Figure S6.** Selected hydrogen bond distances between N(HU) and O(Asp363) during a 25 ps QM/MM metadynamics simulation.

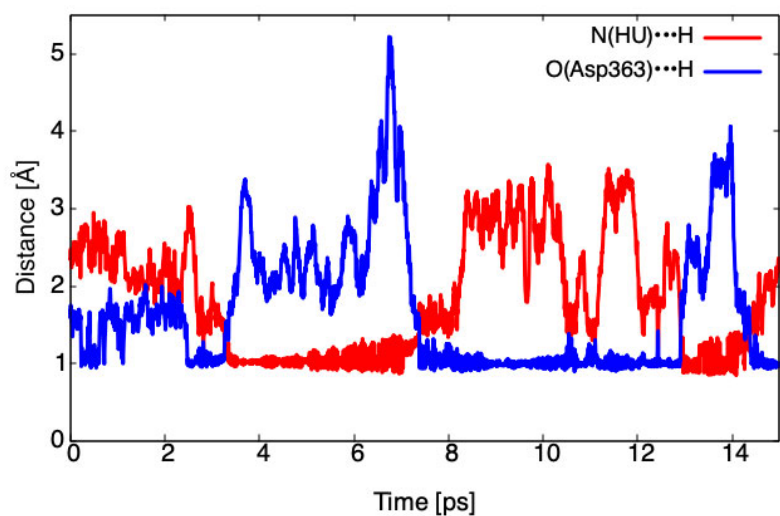

**Figure S7.** Selected hydrogen bond distances between N(HU) and O(Asp363) during a 15 ps QM/MM metadynamics simulation.

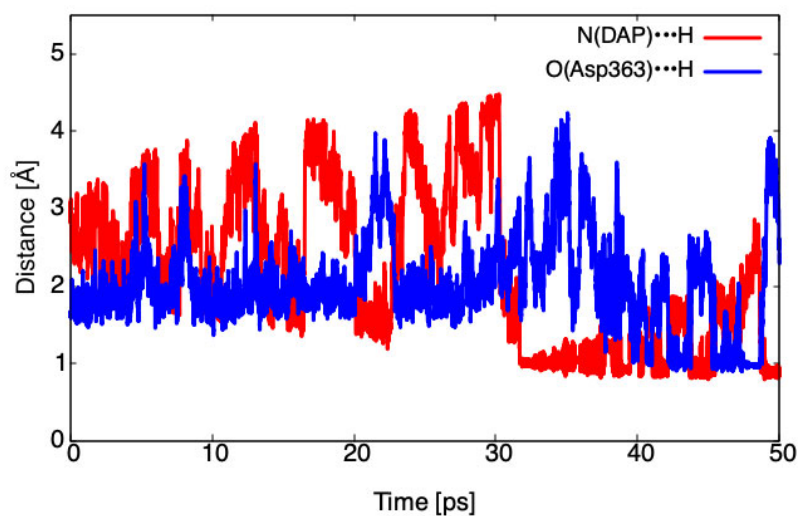

**Figure S8.** Selected hydrogen bond distances between N(DAP) and O(Asp363) during a 50 ps QM/MM metadynamics simulation.

**Section 4: The reaction mechanism of HU hydrolysis process obtained from QM-only (UB3LYP-D3BJ and GFN2-xTB) computations**

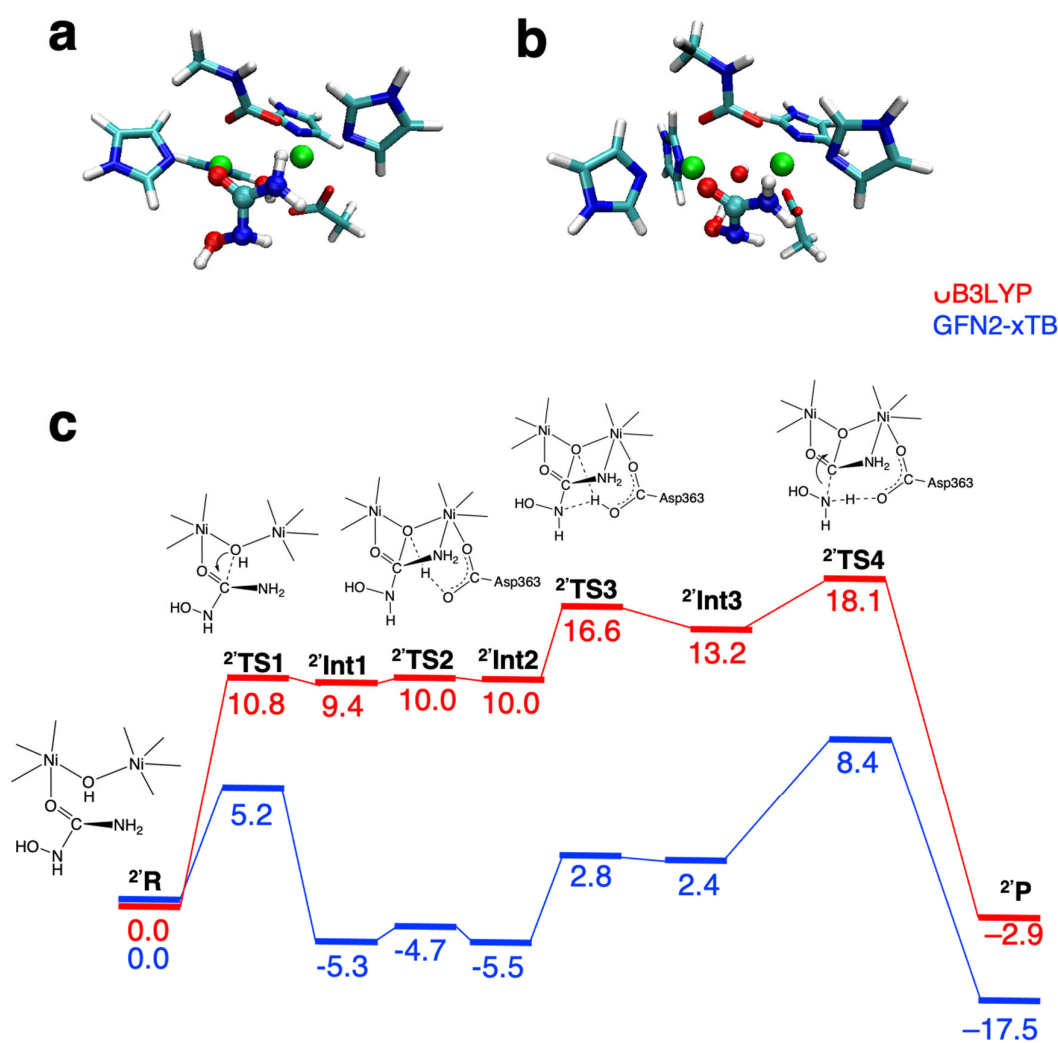

**Figure S9.** HU-bound complexes ( $2^{\circ}\mathbf{RS}_{QM}$ ) optimized at the (a) UB3LYP-D3BJ/def2-SVP and (b) GFN2-xTB levels of theory. (c) Potential energy profile (in kcal/mol) and illustrations of the transition state, intermediate and product structures corresponding to the hydrolysis process of HU obtained at the UB3LYP-D3BJ/def2-SVP and GFN2-xTB levels of theory.

**Section 5: Results of classical MD simulations for inhibitor-bound complexes**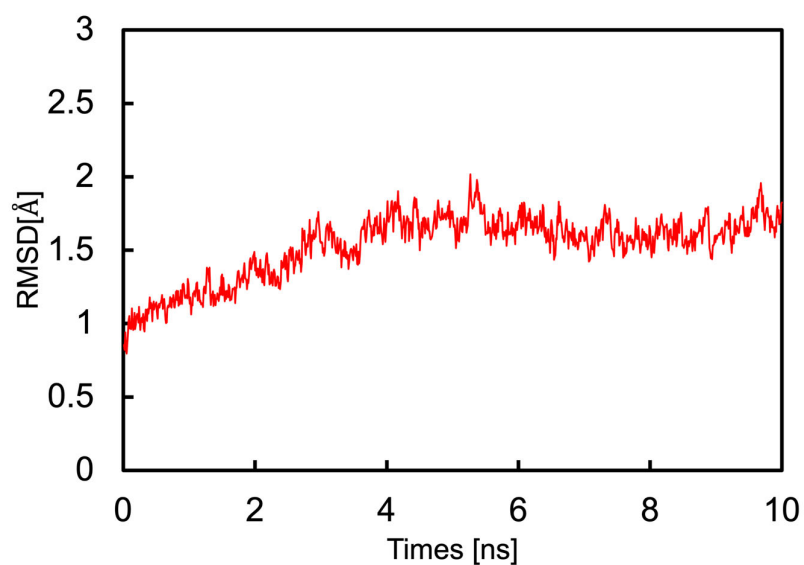

**Figure S10.** RMSD with respect to the initial conformations during a 10 ns classical MD simulation for an AHA-bound complex (1).

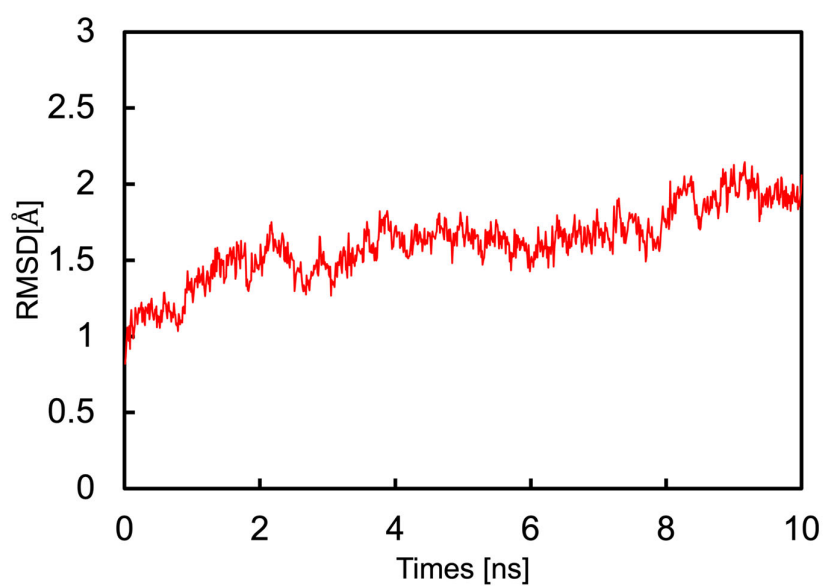

**Figure S11.** RMSD with respect to the initial conformations during a 10 ns classical MD simulation for an HU-bound complex (2).



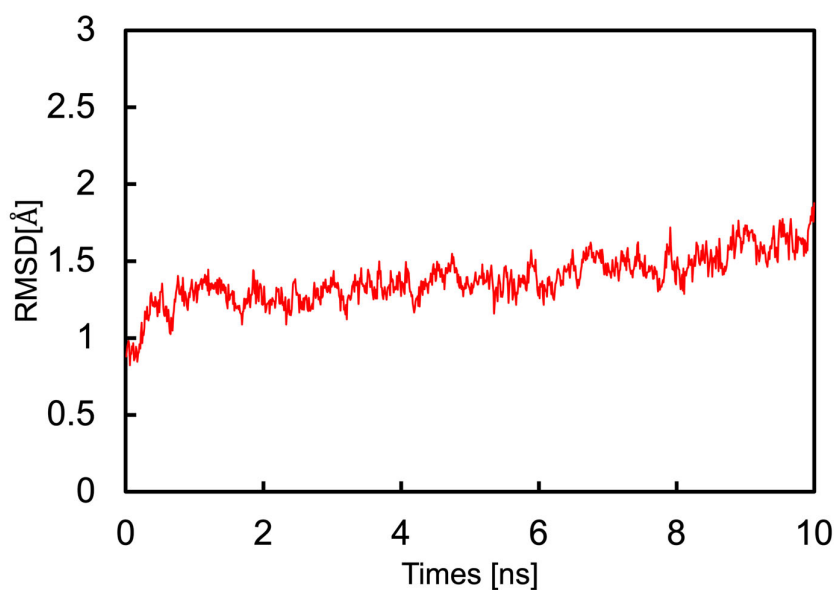

**Figure S12.** RMSD with respect to the initial conformations during a 10 ns classical MD simulation for an HU-bound complex (2').

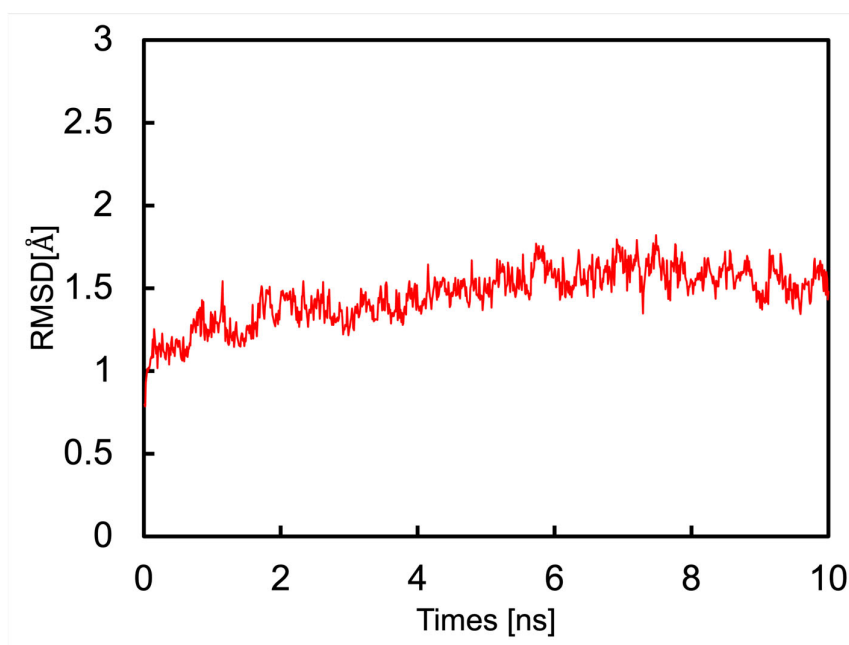

**Figure S13.** RMSD with respect to the initial conformations during a 10 ns classical MD simulation for an NBPTO-bound complex (3).

#### Section 6. Cartesian coordinates for QM/MM MD equilibrated and QM-only optimized structures.

The Cartesian coordinates of the QM atoms after QM/MM MD equilibration

**<sup>1</sup>RS**

C 3.520486 -8.886891 0.065882

H 3.260500 -8.337237 0.958674

H 4.329604 -8.369802 -0.428173

N 5.363554 -10.120766 0.987536  
H 5.932014 -9.289942 0.955132  
C 4.084709 -10.162296 0.520902  
C 5.794266 -11.368177 1.204951  
H 6.792806 -11.566065 1.399841  
N 4.830903 -12.209895 0.905773  
C 3.747636 -11.466487 0.454249  
H 2.871631 -11.960615 0.156933  
C -1.101490 -15.326490 1.009244  
H -1.317062 -16.349956 0.667430  
H -1.508092 -15.201462 1.971661  
N 1.115588 -16.307522 0.686453  
H 0.749078 -17.173528 0.249931  
C 0.351310 -15.205371 0.931130  
C 2.401584 -16.047523 0.924873  
H 3.117345 -16.773997 0.734592  
N 2.471956 -14.840220 1.434099  
C 1.226658 -14.302479 1.501248  
H 1.142354 -13.325443 1.833569  
C 6.151383 -15.153649 -6.314915  
H 5.611734 -14.218349 -6.290071  
H 5.472479 -15.979840 -6.672274  
C 6.572959 -15.623739 -4.918648  
H 5.681620 -16.009119 -4.342046  
H 7.343467 -16.413859 -5.060198  
C 7.324070 -14.587832 -4.050866  
H 8.372974 -14.343183 -4.321159  
H 6.745356 -13.653622 -4.119029  
C 7.400416 -15.160978 -2.652272  
H 7.743699 -16.190782 -2.736052  
H 8.116675 -14.583336 -2.061676  
N 6.138034 -15.178912 -1.939293  
H 5.377765 -14.601833 -2.303832  
C 6.127774 -15.041897 -0.574793  
O 5.106254 -14.734152 0.009987  
O 7.224046 -15.326173 -0.018025  
C 8.504872 -19.089208 -2.568434  
H 8.120948 -19.995994 -3.091043  
H 7.894480 -18.232904 -2.820319  
N 8.695506 -20.245027 -0.303131  
C 8.377948 -19.146553 -1.090666  
C 8.332319 -19.907278 0.931955  
H 8.598443 -20.570054 1.731611

N 7.783134 -18.678517 0.993068  
H 7.649628 -18.075591 1.803079  
C 7.714015 -18.255917 -0.309075  
H 7.374754 -17.234726 -0.520788  
C 10.500155 -15.710763 -0.479485  
H 10.132971 -16.511946 -1.147566  
H 9.690076 -14.984533 -0.280790  
N 9.784154 -16.497539 1.735029  
C 10.825916 -16.410805 0.831979  
C 10.158632 -17.252535 2.752220  
H 9.673283 -17.406856 3.669376  
N 11.396686 -17.715001 2.483154  
H 11.946453 -18.415201 2.955849  
C 11.861506 -17.118192 1.329521  
H 12.893783 -17.246006 1.111002  
C 9.808069 -10.532300 4.402771  
H 8.772421 -10.224157 4.558410  
H 10.267790 -10.783177 5.340436  
N 10.884067 -12.215586 2.843725  
H 11.713851 -11.686857 2.625520  
C 9.810521 -11.786567 3.583738  
C 10.504626 -13.373934 2.219969  
H 11.153699 -13.950184 1.603182  
N 9.262440 -13.679717 2.516200  
C 8.868217 -12.739839 3.381511  
H 7.852212 -12.764073 3.728495  
C 7.100512 -23.074560 6.294601  
H 7.709695 -23.568805 5.531274  
H 7.503323 -23.285130 7.260975  
N 7.179360 -21.011682 4.789145  
H 6.815166 -21.466877 3.947364  
C 7.288826 -21.633182 6.018487  
C 7.391603 -19.702231 4.962387  
H 7.366663 -18.972921 4.194455  
N 7.755238 -19.466066 6.184178  
C 7.698784 -20.632729 6.838643  
H 7.895010 -20.722509 7.896459  
C 3.793768 -10.979793 4.605788  
H 3.669049 -11.033834 5.690561  
H 4.391670 -10.209484 4.271133  
C 4.449976 -12.266327 4.078870  
O 3.689748 -13.027597 3.383561  
O 5.562668 -12.507689 4.445562

N 0.322504 -15.179385 6.316062  
H 0.426781 -14.194321 6.230625  
C 1.483566 -15.828624 5.791821  
H 1.569080 -16.867922 6.109336  
C 1.568448 -15.742803 4.272698  
H 1.922370 -14.751406 4.045367  
H 0.619945 -15.890524 3.765770  
H 2.259540 -16.448489 3.870415  
C 2.661188 -15.222156 6.505998  
O 3.664879 -14.846039 5.926428  
NI 7.935331 -15.277499 1.887916  
NI 4.432225 -14.011419 1.714599  
O 6.355850 -14.240780 2.430821  
H 6.322964 -13.490664 3.080551  
C 6.342067 -16.380156 4.200116  
O 7.294118 -16.653706 3.437795  
N 5.044689 -16.414867 3.788714  
H 4.316711 -15.871436 4.294023  
O 4.752525 -16.456249 2.426247  
H 5.630911 -16.374141 1.982034  
C 6.601046 -16.076236 5.603062  
H 6.462814 -14.956261 5.621478  
H 5.850304 -16.473295 6.259634  
H 7.615103 -16.309149 5.963885  
H 2.637309 -9.053488 -0.550838  
H -1.605510 -14.631688 0.337445  
H 6.919526 -15.073008 -7.084040  
H 9.505738 -18.931648 -2.970357  
H 11.374828 -15.220783 -0.907232  
H 10.309630 -9.698258 3.911944  
H 6.053195 -23.374443 6.258578  
H 2.849480 -10.829137 4.082601  
H -0.572769 -15.598354 6.260828  
H 2.485912 -15.063053 7.569983

## <sup>2</sup>RS

C 3.204658 -9.367727 0.272543  
H 2.870409 -8.769241 1.159108  
H 3.857503 -8.616605 -0.231943  
N 5.181540 -10.643866 1.017532  
H 5.726479 -9.803595 1.089708  
C 3.826133 -10.660576 0.656862  
C 5.511580 -11.953727 1.186700

H 6.515844 -12.276059 1.189583  
N 4.504572 -12.717734 1.000016  
C 3.437455 -11.936131 0.679422  
H 2.463728 -12.357680 0.574958  
C -1.207987 -15.789928 0.736550  
H -1.557635 -16.817975 0.561821  
H -1.638393 -15.522887 1.698380  
N 1.050020 -16.545309 0.154454  
H 0.740883 -17.272571 -0.465119  
C 0.242467 -15.701615 0.870271  
C 2.344577 -16.326232 0.533048  
H 3.144725 -16.930143 0.229552  
N 2.435061 -15.335132 1.368158  
C 1.169703 -14.939671 1.597165  
H 0.997445 -14.118417 2.255773  
C 5.683433 -15.144448 -6.182182  
H 5.065608 -14.283409 -6.036440  
H 5.147571 -15.941132 -6.676121  
C 6.190225 -15.633409 -4.753286  
H 5.316331 -15.852238 -4.127820  
H 6.645561 -16.628284 -4.827883  
C 7.049022 -14.604940 -3.994431  
H 7.973668 -14.379444 -4.540674  
H 6.514640 -13.654761 -4.009987  
C 7.369459 -15.033501 -2.586034  
H 7.874693 -16.003321 -2.599532  
H 8.026032 -14.217843 -2.125819  
N 6.170524 -15.146363 -1.765750  
H 5.283260 -14.943101 -2.173777  
C 6.179554 -15.265222 -0.407409  
O 5.060822 -15.372138 0.118157  
O 7.284744 -15.217560 0.125634  
C 8.411402 -19.338529 -2.528454  
H 8.277741 -20.388470 -2.629260  
H 7.587553 -18.882436 -3.098477  
N 8.692767 -19.515915 0.008583  
C 8.190704 -18.881391 -1.109077  
C 8.062047 -18.870595 0.962797  
H 8.230663 -19.021366 2.014128  
N 7.167522 -17.983723 0.634299  
H 6.699269 -17.338788 1.226627  
C 7.199347 -17.994688 -0.718435  
H 6.563673 -17.410212 -1.315600

C 10.275593 -15.532669 -0.380510  
H 9.833634 -16.198364 -1.133346  
H 9.605297 -14.780057 -0.085251  
N 9.451510 -16.211110 1.904184  
C 10.392037 -16.300105 0.885041  
C 9.692500 -17.121227 2.807541  
H 9.118046 -17.238651 3.716945  
N 10.900013 -17.693899 2.557646  
H 11.331367 -18.353538 3.231337  
C 11.351004 -17.161406 1.363259  
H 12.293217 -17.458058 0.962843  
C 9.524422 -10.087668 4.596511  
H 8.469146 -9.806340 4.739930  
H 9.972110 -10.136316 5.604290  
N 10.637674 -12.020785 3.651777  
H 11.559830 -11.577689 3.745819  
C 9.466397 -11.376028 3.940480  
C 10.370669 -13.206686 3.103780  
H 11.141166 -13.882780 2.866189  
N 9.074267 -13.367173 2.943611  
C 8.509991 -12.259172 3.483395  
H 7.428701 -12.149698 3.399709  
C 7.078290 -22.633239 6.852176  
H 7.762609 -23.289810 6.271808  
H 7.457105 -22.585467 7.813183  
N 6.922072 -21.095850 4.957652  
H 6.763189 -21.875849 4.304605  
C 7.179719 -21.238396 6.286366  
C 7.136275 -19.784931 4.728115  
H 6.974108 -19.356249 3.749056  
N 7.482769 -19.157719 5.795733  
C 7.577891 -20.037047 6.789814  
H 7.774758 -19.729717 7.843564  
C 3.347411 -11.688610 4.647017  
H 3.219731 -11.694536 5.732618  
H 4.114988 -10.983780 4.462469  
C 3.894645 -13.196653 4.421242  
O 3.313400 -13.813847 3.497589  
O 4.906314 -13.581263 5.012116  
N -0.420480 -15.606791 5.862506  
H -0.312157 -14.624619 5.786585  
C 0.734636 -16.402431 5.560801  
H 0.721516 -17.400334 5.977953

C 1.063585 -16.348434 4.058343  
H 1.693722 -15.464533 3.804076  
H 0.147161 -16.398380 3.488551  
H 1.705914 -17.207325 3.844959  
C 1.960640 -15.809743 6.252055  
O 3.102041 -15.776580 5.879784  
NI 7.954114 -14.971659 2.167682  
NI 4.326787 -14.607437 1.901146  
O 6.141586 -14.282851 2.394175  
H 5.925109 -13.787755 3.182847  
C 5.818838 -16.589225 4.024654  
O 6.706865 -17.227916 3.434261  
N 4.576345 -16.301858 3.438611  
H 4.295724 -16.951294 2.731712  
H 3.835401 -16.045508 4.093403  
N 5.947742 -16.069156 5.274263  
H 5.429380 -15.222783 5.490606  
O 7.010682 -16.457230 6.071698  
H 7.752881 -16.361087 5.430964  
H 2.380864 -9.445196 -0.437008  
H -1.520071 -15.126746 -0.070229  
H 6.506654 -14.897336 -6.852512  
H 9.390997 -19.051127 -2.910414  
H 11.239228 -15.154098 -0.721380  
H 9.978561 -9.236594 4.089035  
H 6.073200 -23.048857 6.780374  
H 2.433831 -11.458465 4.098835  
H -1.320635 -15.996081 5.997685

**<sup>2</sup>RS** C 3.681473 -9.098704 -0.480451  
H 3.663005 -8.200350 0.129126  
H 4.399810 -8.925121 -1.250823  
N 5.428214 -10.390209 0.707667  
H 6.180334 -9.714809 0.726847  
C 4.117091 -10.232572 0.312933  
C 5.622382 -11.705764 1.063284  
H 6.546363 -12.128448 1.431123  
N 4.392809 -12.333122 1.098463  
C 3.491482 -11.417703 0.657799  
H 2.498237 -11.733918 0.416566  
C -1.193581 -15.529778 0.843963  
H -1.467416 -16.520134 0.669058  
H -1.596858 -15.231257 1.839897

N 0.935421 -16.809669 0.697036  
H 0.559728 -17.708101 0.430024  
C 0.357433 -15.580674 0.891581  
C 2.295937 -16.588666 0.956113  
H 3.121866 -17.289068 0.794777  
N 2.551480 -15.329923 1.185463  
C 1.317227 -14.694946 1.269516  
H 1.314643 -13.624413 1.369561  
C 6.062016 -14.962287 -6.328867  
H 5.534390 -14.036265 -6.203873  
H 5.332635 -15.686187 -6.594298  
C 6.554378 -15.425655 -4.866916  
H 5.674464 -15.748942 -4.307483  
H 7.187257 -16.214844 -5.070533  
C 7.317125 -14.330193 -4.037503  
H 8.287826 -14.112298 -4.458883  
H 6.739772 -13.397317 -3.950151  
C 7.519491 -14.973842 -2.630271  
H 7.954676 -15.956142 -2.740147  
H 8.165197 -14.337732 -1.950861  
N 6.311289 -14.990892 -1.873067  
H 5.462993 -15.273352 -2.368487  
C 6.251684 -14.847627 -0.531982  
O 5.138648 -15.057369 0.072318  
O 7.411658 -14.682232 0.021171  
C 8.933743 -18.749675 -2.681576  
H 8.540198 -19.658873 -3.161930  
H 8.317547 -17.854433 -3.101150  
N 9.111940 -19.659914 -0.312795  
C 8.762392 -18.671179 -1.160684  
C 8.623646 -19.301016 0.884243  
H 8.696493 -19.809355 1.830677  
N 7.927839 -18.160946 0.777761  
H 7.585233 -17.509447 1.493764  
C 8.101727 -17.734897 -0.513916  
H 7.662301 -16.814262 -0.776250  
C 10.615337 -15.384189 -0.780235  
H 10.215825 -16.133435 -1.484035  
H 9.817734 -14.656074 -0.682013  
N 9.911808 -15.849425 1.609770  
C 10.742968 -16.089103 0.545019  
C 10.289887 -16.715599 2.555953  
H 9.901453 -16.771094 3.573722



N 11.303922 -17.510919 2.126741  
H 11.654726 -18.248616 2.688758  
C 11.574716 -17.166789 0.825730  
H 12.221412 -17.623969 0.162165  
C 9.771808 -10.067087 4.372425  
H 8.741062 -9.753311 4.480346  
H 10.098763 -10.376033 5.349545  
N 10.807973 -11.912324 2.827361  
H 11.797861 -11.697410 2.942739  
C 9.769739 -11.265491 3.488832  
C 10.267813 -12.816137 1.991173  
H 10.849031 -13.527512 1.469916  
N 8.930189 -12.868547 2.147422  
C 8.651076 -11.876106 2.995786  
H 7.620682 -11.658220 3.229339  
C 7.151763 -23.164950 6.224374  
H 7.742657 -23.656532 5.484368  
H 7.706778 -23.324849 7.139532  
N 6.627165 -21.151626 4.662645  
H 6.335128 -21.758093 3.925303  
C 7.166396 -21.651240 5.830433  
C 6.934413 -19.823737 4.548952  
H 6.748869 -19.315852 3.645116  
N 7.632027 -19.481847 5.595118  
C 7.849017 -20.573737 6.357239  
H 8.319919 -20.564551 7.306333  
C 2.867961 -11.479808 4.670592  
H 2.620449 -11.687259 5.696552  
H 3.527594 -10.651158 4.738285  
C 3.723694 -12.699058 4.196614  
O 3.229488 -13.470407 3.386754  
O 4.871378 -12.717215 4.707171  
N -0.337523 -16.235067 6.192585  
H -0.169861 -15.880889 7.112849  
C 0.844177 -16.589454 5.412581  
H 0.897489 -17.686983 5.618581  
C 0.852335 -16.277586 3.943958  
H -0.011029 -15.632373 3.761188  
H 0.748122 -17.149804 3.327709  
H 1.837269 -15.758538 3.751686  
C 2.034978 -16.021549 6.125529  
O 3.051122 -15.629539 5.565978  
NI 7.984424 -14.784977 2.036100

NI 4.375062 -14.347566 1.773907  
O 6.131310 -14.158683 2.867600  
H 6.005396 -13.473488 3.524644  
C 6.007481 -16.347783 3.647829  
O 7.045227 -16.645369 3.035414  
N 4.811807 -16.673429 3.165392  
H 4.778812 -16.930588 2.183376  
H 3.951288 -16.601768 3.721651  
N 5.939754 -15.920870 4.887996  
H 5.223564 -15.157046 5.133215  
O 7.213215 -15.630301 5.418695  
H 7.573690 -14.892121 4.879371  
H 2.723184 -9.190414 -0.991696  
H -1.607075 -14.818295 0.129180  
H 6.843407 -14.884056 -7.084782  
H 9.950269 -18.614383 -3.050995  
H 11.543602 -14.946308 -1.147229  
H 10.334317 -9.236544 3.945948  
H 6.166883 -23.625286 6.303127  
H 1.988939 -11.264228 4.063183  
H -1.253762 -16.320519 5.827477  
H 1.919848 -15.885404 7.200848

**<sup>3</sup>RS** C 3.204943 -9.050707 0.113515

H 2.725867 -8.642854 1.041628  
H 3.985584 -8.279739 -0.157326  
N 5.037750 -10.143773 1.230074  
H 5.400263 -9.242012 1.493941  
C 3.914627 -10.281876 0.533213  
C 5.449673 -11.356372 1.540961  
H 6.289504 -11.551493 2.215713  
N 4.654471 -12.316010 1.094296  
C 3.666976 -11.624262 0.388458  
H 2.766130 -12.062838 -0.020274  
C -1.229610 -15.470445 1.031340  
H -1.512264 -16.496022 0.782615  
H -1.692608 -15.175127 1.955997  
N 0.975308 -16.478604 0.484741  
H 0.615301 -17.330961 0.117509  
C 0.277843 -15.459491 1.057286  
C 2.281892 -16.222613 0.706355  
H 3.083374 -16.825297 0.436176  
N 2.481378 -15.057613 1.349899

C 1.202668 -14.598657 1.579974  
H 1.056530 -13.687054 2.135098  
C 5.629453 -15.072491 -6.226022  
H 5.178781 -14.078130 -6.041373  
H 4.830174 -15.730949 -6.472167  
C 6.221075 -15.530524 -4.916800  
H 5.416303 -15.909451 -4.234160  
H 6.894808 -16.376700 -4.950315  
C 7.007532 -14.428851 -4.280175  
H 7.896558 -14.276240 -4.843236  
H 6.448020 -13.501247 -4.338507  
C 7.399466 -14.708838 -2.762802  
H 7.970929 -15.620245 -2.676292  
H 8.066388 -13.888570 -2.386107  
N 6.184910 -14.755125 -1.968466  
H 5.507301 -14.054814 -2.272249  
C 6.251426 -14.895251 -0.568244  
O 5.151062 -14.912836 -0.000304  
O 7.385361 -15.202490 -0.056086  
C 8.502805 -19.533255 -2.964821  
H 8.246109 -20.546487 -3.338727  
H 7.762272 -18.873708 -3.455726  
N 8.278254 -20.356791 -0.600435  
C 8.130136 -19.383062 -1.502845  
C 7.847122 -19.897351 0.550929  
H 7.851963 -20.494286 1.443297  
N 7.355877 -18.648348 0.438755  
H 7.001021 -18.070444 1.193498  
C 7.627788 -18.253491 -0.878651  
H 7.331065 -17.312606 -1.259272  
C 10.157677 -15.801989 -0.781967  
H 9.836922 -16.522973 -1.470501  
H 9.369807 -15.029083 -0.830439  
N 9.607844 -16.008408 1.726977  
C 10.113950 -16.458288 0.556252  
C 9.595682 -17.069166 2.556916  
H 9.268162 -16.996930 3.589464  
N 10.149961 -18.158752 1.965472  
H 10.067695 -19.085350 2.372266  
C 10.416742 -17.797004 0.709332  
H 10.938584 -18.485037 0.077604  
C 10.119543 -10.242887 4.346566  
H 9.118214 -9.888121 4.574846

H 10.603714 -10.471621 5.322685  
N 10.917827 -12.002850 2.735006  
H 11.852458 -11.666183 2.621646  
C 9.965209 -11.433229 3.500191  
C 10.319104 -13.027153 2.070746  
H 10.862092 -13.624020 1.375043  
N 9.070674 -13.192564 2.423213  
C 8.865312 -12.185183 3.342573  
H 7.910356 -12.138372 3.896538  
C 7.448797 -22.585641 6.447368  
H 8.066333 -23.006079 5.633222  
H 7.812330 -22.872413 7.428644  
N 7.908212 -20.526023 5.205062  
H 8.322089 -20.891092 4.367756  
C 7.456880 -21.111992 6.351708  
C 7.965907 -19.106810 5.442907  
H 7.970372 -18.492266 4.578504  
N 7.541384 -18.883262 6.664548  
C 7.173364 -20.043822 7.188639  
H 6.651432 -20.015022 8.113555  
C 3.608635 -11.152477 4.702013  
H 3.370592 -11.159515 5.794280  
H 4.356415 -10.459400 4.373775  
C 4.243307 -12.460151 4.152701  
O 3.533363 -13.236480 3.496178  
O 5.480874 -12.503886 4.367986  
N -0.089689 -15.289088 5.838756  
H 0.104271 -14.335715 5.595152  
C 0.967709 -16.189888 5.992767  
H 0.752045 -17.035782 6.679980  
C 1.326043 -16.711340 4.641399  
H 1.526320 -15.971586 3.953803  
H 0.565602 -17.443458 4.315030  
H 2.164163 -17.347651 4.793034  
C 2.193706 -15.406687 6.559608  
O 3.101126 -15.220277 5.795331  
NI 7.911723 -14.919837 1.779403  
NI 4.370422 -14.226056 1.924321  
O 6.307886 -14.537897 2.869593  
H 6.253857 -13.744316 3.466434  
O 6.795253 -16.890264 2.548934  
N 6.713788 -16.075730 4.979884  
H 7.413600 -15.445653 4.659805

N 4.398057 -16.140610 3.327126  
H 3.648106 -16.737809 3.064869  
H 3.995965 -15.470993 4.001729  
P 5.869969 -16.748917 3.717217  
C 6.035605 -15.516265 6.161497  
H 5.157191 -16.099768 6.361509  
H 5.789551 -14.456834 6.013149  
C 6.910527 -15.781331 7.433749  
H 7.283735 -16.795176 7.378056  
H 7.792551 -15.176530 7.494852  
C 6.041095 -15.619650 8.676168  
H 5.195110 -16.333176 8.640106  
H 5.652660 -14.598862 8.734486  
C 6.884114 -16.005335 9.911583  
H 6.357286 -15.806221 10.866840  
H 7.083480 -17.087274 9.857264  
H 7.827097 -15.489433 9.928394  
N 5.306771 -18.331361 4.251750  
H 5.919183 -19.059631 4.138564  
H 4.993248 -18.541080 5.227183  
H 2.447907 -9.139645 -0.665642  
H -1.583837 -14.882364 0.184708  
H 6.341871 -15.039332 -7.050317  
H 9.510280 -19.252563 -3.271915  
H 11.067220 -15.341649 -1.167868  
H 10.695783 -9.443422 3.880837  
H 6.447562 -23.014273 6.403753  
H 2.685220 -10.940649 4.163001  
H -1.020556 -15.615561 5.922437  
H 2.181021 -15.076744 7.598394

The Cartesian coordinates for AHA- and HU- complexes optimized at the UB3LYP-D3BJ/def2-SVP level ( $^1\text{RS}_{\text{QMa}}$ ,  $^1\text{RS}_{\text{QMb}}$ ,  $^2\text{RS}_{\text{QMa}}$ , and  $^2\text{RS}_{\text{QMb}}$  see also Section 1).

$^1\text{RS}_{\text{QMa}}$

|   |                  |                    |                   |
|---|------------------|--------------------|-------------------|
| N | 6.48814780874553 | -10.85627873395009 | 0.19191444254459  |
| H | 7.23462480715227 | -10.44179105070998 | -0.35242895790624 |
| C | 5.55171758868108 | -10.16979095418600 | 0.94398259798247  |
| C | 6.21988782801015 | -12.18267759794309 | 0.28056601051518  |
| H | 6.80686396349864 | -12.97985900258871 | -0.17377336039014 |
| N | 5.16594838318073 | -12.36899800291128 | 1.05342370775003  |
| C | 4.73249451380449 | -11.13349101433723 | 1.47746675518486  |

---

|    |                   |                    |                   |
|----|-------------------|--------------------|-------------------|
| H  | 3.87395883226804  | -11.03757339419726 | 2.13646568846843  |
| N  | 0.97200856115388  | -13.85055124264085 | -0.93018301959086 |
| H  | 0.51200188339010  | -13.97132273578975 | -1.82500037637357 |
| C  | 0.40255800990556  | -13.31790108017235 | 0.21059249497717  |
| C  | 2.25053372046348  | -14.19487385695817 | -0.64680090911856 |
| H  | 2.95427196912825  | -14.64331989259653 | -1.34343734673968 |
| N  | 2.52284725855869  | -13.90843654184083 | 0.61489199815056  |
| C  | 1.38548724207859  | -13.36051457177210 | 1.16816219087146  |
| H  | 1.37601069680058  | -13.05085611489325 | 2.20908129730147  |
| C  | 7.40025188372317  | -17.45997643022739 | -1.53910696033129 |
| H  | 7.94284640833206  | -17.72875771771816 | -0.61975342703844 |
| H  | 8.08629654426771  | -16.87919450755972 | -2.18094281817381 |
| N  | 6.18669174264434  | -16.73642046102039 | -1.23501606603496 |
| H  | 5.30613678624291  | -17.04805540320064 | -1.62333697876508 |
| C  | 6.12222241213253  | -15.66847391740728 | -0.39037491349931 |
| O  | 4.98056230367535  | -15.15628828134282 | -0.19485169360635 |
| O  | 7.22625921222568  | -15.25787234369573 | 0.11288591390662  |
| N  | 9.56412202074546  | -15.87803657605233 | 1.67848331634405  |
| C  | 10.14835725260226 | -15.96064684720998 | 0.43239904613252  |
| C  | 10.46401324992283 | -16.27396891710598 | 2.56313184648442  |
| H  | 10.30469871436435 | -16.31312602682429 | 3.63799042342766  |
| N  | 11.61248618653780 | -16.61220332948051 | 1.93028732438174  |
| H  | 12.45227741273173 | -16.96135038819458 | 2.37840610733969  |
| C  | 11.43503188110868 | -16.42077216514642 | 0.57415057196980  |
| H  | 12.21612315608290 | -16.63232844094492 | -0.15053654924602 |
| N  | 9.32347573186819  | -11.37488775232355 | 2.42497992282826  |
| H  | 10.03762472132967 | -10.68764305618258 | 2.21383643380262  |
| C  | 8.28791313579358  | -11.22137226976823 | 3.32802069256112  |
| C  | 9.25527297745539  | -12.62984396911461 | 1.91490547781968  |
| H  | 9.95431786290014  | -13.03573280134506 | 1.18676712480280  |
| N  | 8.22821439943849  | -13.27168426955626 | 2.44249357231296  |
| C  | 7.61115279710701  | -12.41586918079673 | 3.32980868339384  |
| H  | 6.73969621867905  | -12.72594389753135 | 3.90512375553418  |
| C  | 3.17394062963187  | -12.68647015873968 | 5.50722682698384  |
| H  | 3.59192436409092  | -12.85658752376132 | 6.50724991700984  |
| H  | 3.18281618351799  | -11.60533936721221 | 5.29270658691402  |
| C  | 3.98448615740551  | -13.40865554001815 | 4.44504006446876  |
| O  | 3.47629156408148  | -13.44177306163592 | 3.27944316374311  |
| O  | 5.09645001713933  | -13.90140989137352 | 4.76183836213833  |
| Ni | 7.66450317345617  | -15.20618535797758 | 2.11649558930578  |
| Ni | 4.35185169164993  | -14.17487206172139 | 1.52559106304362  |
| O  | 5.72975394872857  | -15.14967034883598 | 2.56850936920068  |
| H  | 5.58609523254630  | -14.74107487623176 | 3.47067783218229  |

|   |                   |                    |                   |
|---|-------------------|--------------------|-------------------|
| C | 7.28842994618675  | -16.26319485339916 | 4.93648098732979  |
| O | 8.05200748937331  | -15.64152151855851 | 4.17033636445869  |
| N | 6.45032766523948  | -17.21606880348196 | 4.51201558828597  |
| H | 5.77887490137293  | -17.64916812905649 | 5.13987470191122  |
| O | 6.28639878293715  | -17.50263630305363 | 3.18534538235917  |
| H | 5.84918195549529  | -16.64327718916586 | 2.82571183057106  |
| C | 7.21949445364440  | -15.92922147655061 | 6.39936187751371  |
| H | 6.60114451013960  | -15.01957593872996 | 6.47841376125949  |
| H | 6.76597987448854  | -16.72703654498641 | 7.00448362556496  |
| H | 2.12469439180288  | -13.01431520466306 | 5.47099316359723  |
| H | 7.14130671376936  | -18.38563111933279 | -2.07119079253793 |
| H | 9.58550211400677  | -15.69579332963557 | -0.45748252205315 |
| H | -0.62573831692721 | -12.96931044958633 | 0.23924896012371  |
| H | 5.54833396471456  | -9.08660821340125  | 1.02328200098238  |
| H | 8.12997771381169  | -10.30020661177292 | 3.88107293498189  |
| H | 8.22787984896453  | -15.70606718987973 | 6.77161825068752  |

**<sup>1</sup>RS<sub>QMb</sub>**

|   |                  |                    |                   |
|---|------------------|--------------------|-------------------|
| N | 5.11723994614320 | -10.81620666401439 | -0.57159376110543 |
| H | 5.68343276706593 | -10.15446348238898 | -1.08904913098219 |
| C | 3.73492840344189 | -10.86519254826066 | -0.55012799923608 |
| C | 5.58969952233842 | -11.78984892775939 | 0.24394949841024  |
| H | 6.64077582082706 | -12.00143181643136 | 0.42303322327331  |
| N | 4.57886420304640 | -12.46129492509118 | 0.77179793238693  |
| C | 3.41496280901264 | -11.89799353774992 | 0.29527793935085  |
| H | 2.44449689268947 | -12.23874905139885 | 0.64026346329123  |
| N | 2.21605317266213 | -16.91611313967266 | 0.38868170867725  |
| H | 2.06305957653239 | -17.79808912753165 | -0.08614476059181 |
| C | 1.23711388387294 | -16.09237314482426 | 0.90800987386621  |
| C | 3.42165098550274 | -16.35018414466814 | 0.63776707087919  |
| H | 4.38344340437251 | -16.77767668613758 | 0.36342774485576  |
| N | 3.25851644875121 | -15.20753506752064 | 1.28632842187919  |
| C | 1.90262120284542 | -15.02886163529201 | 1.46746494908177  |
| H | 1.52971536710903 | -14.15313034608983 | 1.99594667070207  |
| C | 6.64454501646989 | -13.83486004311969 | -2.48460454357806 |
| H | 6.52777391330190 | -14.39075760720613 | -3.42765287342920 |
| H | 7.70812522307807 | -13.61206264764136 | -2.33462358435370 |
| N | 6.18226386893363 | -14.62454520632918 | -1.36403923695477 |
| H | 5.23974066979961 | -14.99489102950941 | -1.37775032351680 |
| C | 6.81618754637393 | -14.68569119017635 | -0.16691170512030 |
| O | 6.24542357500657 | -15.32920096712278 | 0.79516271801481  |
| O | 7.93538204084181 | -14.11908487230983 | 0.00503318688287  |
| N | 9.23422149301406 | -16.28721292393575 | 1.55419585980269  |

|    |                   |                    |                   |
|----|-------------------|--------------------|-------------------|
| C  | 9.89559753541072  | -16.44095962580724 | 0.35458673459857  |
| C  | 9.46866272319959  | -17.37263184815995 | 2.27496994325841  |
| H  | 9.08164531879091  | -17.55369921175377 | 3.27482713312572  |
| N  | 10.26111039055731 | -18.22332280443167 | 1.57953248128583  |
| H  | 10.57924571901245 | -19.13038896007292 | 1.90206735810996  |
| C  | 10.54457798397143 | -17.65125624700775 | 0.35531786067455  |
| H  | 11.16411203031704 | -18.14407946170744 | -0.38846717006153 |
| N  | 11.50966179543407 | -12.82727489559177 | 3.64167523658957  |
| H  | 12.45694373500236 | -12.84854937715969 | 4.00274208192264  |
| C  | 10.72124952818005 | -11.70362098993706 | 3.50093489663911  |
| C  | 10.80360125534897 | -13.89947818981901 | 3.20791527903452  |
| H  | 11.18008079184131 | -14.91943588233165 | 3.20160089951793  |
| N  | 9.60754953725018  | -13.51586357272930 | 2.79938704792839  |
| C  | 9.53447646263626  | -12.15070945205552 | 2.97346650836754  |
| H  | 8.63797357426343  | -11.60036400901618 | 2.70231584005880  |
| C  | 2.69737758669247  | -12.35173365181983 | 5.40542076249697  |
| H  | 3.57793089902230  | -11.85415827404387 | 5.84063051724712  |
| H  | 1.82803218432882  | -11.68436576139085 | 5.45164514800344  |
| C  | 2.97784501880771  | -12.76213016807104 | 3.96768212126571  |
| O  | 4.07274682290502  | -13.45050992110042 | 3.80937156773175  |
| O  | 2.20875311206963  | -12.46392482582282 | 3.06043846493697  |
| Ni | 8.06787751797989  | -14.65660603229330 | 2.06848249328758  |
| Ni | 4.82996810184268  | -14.07633743400378 | 2.02014205884616  |
| O  | 6.64256855757118  | -13.37464031403739 | 2.56974521701776  |
| H  | 6.61356906714837  | -12.84008790362991 | 3.37061005258594  |
| C  | 6.92820149492421  | -15.22685543887471 | 4.76842145092875  |
| O  | 7.74935776941861  | -15.78305836485887 | 4.00172521714417  |
| N  | 5.61602589509266  | -15.36578112475630 | 4.55920894096996  |
| H  | 4.93389100588536  | -14.57837025266103 | 4.71282627053473  |
| O  | 5.26568427972225  | -15.95296054120017 | 3.34882726450976  |
| H  | 6.11671899686455  | -16.29482588953906 | 2.99644071631746  |
| C  | 7.34585256267236  | -14.40227639186007 | 5.94752969463779  |
| H  | 7.95712578880201  | -13.56504536975987 | 5.57590401157860  |
| H  | 6.49023592586671  | -14.01351003708775 | 6.51530636568597  |
| H  | 7.98122952192714  | -15.00937847471255 | 6.60935264011602  |
| H  | 2.49526663120615  | -13.25047447006069 | 6.01119729113658  |
| H  | 6.09752738363753  | -12.87933930669112 | -2.57203693466625 |
| H  | 9.83830084093712  | -15.67455187276946 | -0.41346954955892 |
| H  | 0.17951139930505  | -16.32989774131964 | 0.83820615891443  |
| H  | 3.11851149055026  | -10.16682958532529 | -1.10861143041990 |
| H  | 11.06607932056928 | -10.71147703254279 | 3.77794196521493  |



---

|   |                   |                    |                   |
|---|-------------------|--------------------|-------------------|
| N | 6.54998482596257  | -10.89308358692580 | 0.34041515998079  |
| H | 7.31024073346888  | -10.46535441244102 | -0.17410600607806 |
| C | 5.59485956663718  | -10.22511037952294 | 1.08499669931708  |
| C | 6.27746944047431  | -12.22066260623605 | 0.38553318933620  |
| H | 6.87402882916362  | -13.00801617687242 | -0.07456874556588 |
| N | 5.20191021049731  | -12.42589014521848 | 1.12412137147673  |
| C | 4.75934239252545  | -11.20094553469156 | 1.56939049238433  |
| H | 3.88131679120270  | -11.11872369721609 | 2.20416939955811  |
| N | 1.02588372993461  | -13.84966551944719 | -0.97639607126419 |
| H | 0.58086813417981  | -13.94976675453808 | -1.88134154062061 |
| C | 0.43674675125187  | -13.34649793917071 | 0.16746111296573  |
| C | 2.29947058838578  | -14.20063754893642 | -0.68017201522739 |
| H | 3.01364426140030  | -14.63285547508268 | -1.37607728975528 |
| N | 2.55121500393228  | -13.94610438401077 | 0.59294068212080  |
| C | 1.40346605588564  | -13.41283761874737 | 1.13991111296893  |
| H | 1.37382816898299  | -13.13078667099384 | 2.18791083531289  |
| C | 7.46776826283088  | -17.34888643174207 | -1.67394688218056 |
| H | 8.02475438938531  | -17.64418876498484 | -0.77170104714272 |
| H | 8.13023425275994  | -16.71283115306181 | -2.28689164994921 |
| N | 6.23230121720610  | -16.68241981702911 | -1.32794943175071 |
| H | 5.35933329637199  | -17.00350285373698 | -1.72589736237186 |
| C | 6.14070694626388  | -15.66050028993169 | -0.43220740954023 |
| O | 4.98620763615304  | -15.19328804654637 | -0.20392170176424 |
| O | 7.23434853829076  | -15.23942250326542 | 0.08506673055467  |
| N | 9.56139954278716  | -15.99017583771448 | 1.54183162809311  |
| C | 10.15783069796621 | -15.89284243814601 | 0.30189453755430  |
| C | 10.41744645320337 | -16.60254253850543 | 2.34430181455037  |
| H | 10.23083890109924 | -16.82787408447634 | 3.39150067793749  |
| N | 11.54782256179822 | -16.90431011768530 | 1.66352395993813  |
| H | 12.35163962574153 | -17.39122243423251 | 2.04420459447985  |
| C | 11.40656533146838 | -16.46143270650843 | 0.36292496413003  |
| H | 12.18190562570197 | -16.59666149562691 | -0.38582576799569 |
| N | 9.42308848808868  | -11.54892886262177 | 2.73705471774815  |
| H | 10.17584630846842 | -10.87913404254043 | 2.62630414217532  |
| C | 8.30135699491408  | -11.38921168269724 | 3.52809027254052  |
| C | 9.37056389763786  | -12.78128941452779 | 2.17331528970426  |
| H | 10.13183176417732 | -13.18523420603627 | 1.50934436814075  |
| N | 8.27184403976210  | -13.40516790079490 | 2.56020570398660  |
| C | 7.58913148779654  | -12.55705783795016 | 3.40779796375758  |
| H | 6.64746874373991  | -12.84763403478540 | 3.87036522581622  |
| C | 2.96461116797383  | -12.96776087083463 | 5.52172552165705  |
| H | 3.36567601274058  | -13.11941976107974 | 6.53161382276842  |
| H | 2.85501309127014  | -11.88767679225966 | 5.33348442143735  |

|    |                   |                    |                   |
|----|-------------------|--------------------|-------------------|
| C  | 3.87831729595605  | -13.56713863597251 | 4.46743816512963  |
| O  | 3.44008536360383  | -13.56777317788911 | 3.27787097948167  |
| O  | 5.00580675304739  | -14.00813890176625 | 4.81618231107014  |
| Ni | 7.68960090152702  | -15.30567917236137 | 2.08011604265349  |
| Ni | 4.37176029271850  | -14.24257549863657 | 1.52090496523883  |
| O  | 5.76924771512936  | -15.20761487135985 | 2.56266950729335  |
| H  | 5.60323596129643  | -14.79611535266688 | 3.44955102529175  |
| C  | 7.29604855441132  | -16.02389802772866 | 4.90800221003209  |
| O  | 8.18341572097824  | -16.03344424299761 | 4.02404648191815  |
| N  | 6.24066261343857  | -16.86624697004794 | 4.87768337141345  |
| H  | 5.46664853034368  | -16.72561153538785 | 5.52271153192030  |
| O  | 5.92169457863688  | -17.52210669301325 | 3.71624370829723  |
| N  | 7.34718756506960  | -15.17793420699655 | 5.98084528145122  |
| H  | 6.45838418927056  | -14.72853432445604 | 6.20628256902353  |
| H  | 8.12443195365975  | -14.52878124761620 | 5.92607768240949  |
| H  | 5.68231326451484  | -16.76737514139473 | 3.09797761962225  |
| H  | 1.96081985605730  | -13.41104383836912 | 5.44301811295399  |
| H  | 7.23613172872483  | -18.25458344332213 | -2.25087223943462 |
| H  | 9.62701226600285  | -15.44570607175176 | -0.53303888407951 |
| H  | -0.59246062527462 | -12.99999328631105 | 0.18772223924587  |
| H  | 5.58949839044349  | -9.14424372467703  | 1.19180042713856  |
| H  | 8.11104250095971  | -10.48149703590011 | 4.09323793074348  |

**<sup>2</sup>RS<sub>QMb</sub>**

|   |                  |                    |                   |
|---|------------------|--------------------|-------------------|
| N | 5.16386702594449 | -10.79480079431863 | -0.46961316318669 |
| H | 5.73534977207407 | -10.09624230703869 | -0.92951929415136 |
| C | 3.78775603214458 | -10.90842383910258 | -0.55620632504417 |
| C | 5.61865109016414 | -11.76376374979806 | 0.36150663389871  |
| H | 6.66033593161696 | -11.93433533243751 | 0.61975219796413  |
| N | 4.60416112322060 | -12.49231011046383 | 0.79762053265660  |
| C | 3.45505490709874 | -11.97351387975896 | 0.24295515088776  |
| H | 2.47718817789941 | -12.36800392969318 | 0.49714214467501  |
| N | 2.22821484740397 | -16.92500863029404 | 0.35015608054727  |
| H | 2.07687403581325 | -17.80091280567423 | -0.13618482037222 |
| C | 1.24723637674453 | -16.10397221581466 | 0.87021062147058  |
| C | 3.43339853346878 | -16.36549495651904 | 0.61662501655133  |
| H | 4.39646219987143 | -16.79208882600214 | 0.34517967234188  |
| N | 3.26797096595194 | -15.23014993447342 | 1.27641511909449  |
| C | 1.91117338509270 | -15.04902111621358 | 1.44762059358340  |
| H | 1.53717044955621 | -14.17614289392517 | 1.98028701840676  |
| C | 6.66033338888470 | -13.74505026820061 | -2.41940100533993 |
| H | 6.53845158485934 | -14.26315871386940 | -3.38314878922271 |
| H | 7.72483331692136 | -13.52937903498720 | -2.26594551253227 |

---

|    |                   |                    |                   |
|----|-------------------|--------------------|-------------------|
| N  | 6.20281245630874  | -14.57847747911257 | -1.32894528828050 |
| H  | 5.25483512548587  | -14.93465622601786 | -1.34730588421327 |
| C  | 6.83383505444602  | -14.66958852828630 | -0.13164409695732 |
| O  | 6.25874247685398  | -15.33447833514546 | 0.81299446524680  |
| O  | 7.95456902516897  | -14.11206784637089 | 0.05644603681619  |
| N  | 9.22011562125285  | -16.31016365727305 | 1.60456942658520  |
| C  | 9.85429615583127  | -16.49276295326058 | 0.39429212650155  |
| C  | 9.44732629060801  | -17.39006547994357 | 2.33514179449909  |
| H  | 9.07537048766923  | -17.55082264625793 | 3.34426360030640  |
| N  | 10.20942138009489 | -18.26560657485780 | 1.63641955373521  |
| H  | 10.51581966095108 | -19.17464716899995 | 1.96466986404766  |
| C  | 10.47983735638698 | -17.71549176225900 | 0.39904217530609  |
| H  | 11.07414094590197 | -18.23103118261959 | -0.34994566383420 |
| N  | 11.61559489889284 | -12.76528235022572 | 3.35824855258112  |
| H  | 12.61057426396464 | -12.75091644523617 | 3.55271330815785  |
| C  | 10.75762427185164 | -11.68752863305875 | 3.44045608660258  |
| C  | 10.90280379166867 | -13.84584523754330 | 2.95678104838748  |
| H  | 11.32677975098965 | -14.83421606704636 | 2.79666537240520  |
| N  | 9.63661665775362  | -13.51157299730713 | 2.78221181113227  |
| C  | 9.52435169901913  | -12.17041228617114 | 3.07696243690130  |
| H  | 8.56904179673788  | -11.66024191395977 | 2.99250614551937  |
| C  | 2.68275571166921  | -12.35720958069438 | 5.38832515312385  |
| H  | 3.56984840706735  | -11.88725306894093 | 5.84075438771377  |
| H  | 1.83485039511342  | -11.66161105590705 | 5.41328641407913  |
| C  | 2.98053940405266  | -12.78516169087770 | 3.95823887005846  |
| O  | 4.06886159557851  | -13.48802989347711 | 3.82499825535763  |
| O  | 2.22829824082460  | -12.48659346780154 | 3.03727923771613  |
| Ni | 8.06934875192700  | -14.66208701654257 | 2.11853636969353  |
| Ni | 4.84254157718529  | -14.11695860959461 | 2.04414175242461  |
| O  | 6.64614726299623  | -13.38223635869395 | 2.62933853106813  |
| H  | 6.59239509354380  | -12.94438799334285 | 3.48654581772885  |
| C  | 6.86988007563246  | -15.24786045126865 | 4.80194383047849  |
| O  | 7.72954462638403  | -15.75514536251786 | 4.04598958148374  |
| N  | 5.54090059908552  | -15.48158858911767 | 4.61223998629060  |
| H  | 4.88600141093323  | -14.66506163180940 | 4.70809214578756  |
| O  | 5.25149627053114  | -16.00288847909782 | 3.33974439380267  |
| H  | 6.10932149113231  | -16.34819964117912 | 3.01537731067393  |
| H  | 2.43639427380045  | -13.24626533264339 | 5.99231000090225  |
| H  | 6.11423478205561  | -12.78616279169444 | -2.46590636232159 |
| H  | 9.79501095733790  | -15.73558601156457 | -0.38286130913811 |
| H  | 0.18950142795770  | -16.33693310391306 | 0.78800142336942  |
| H  | 3.18269437983940  | -10.22712118130184 | -1.14722298260468 |
| H  | 11.09272694772294 | -10.69790543380645 | 3.73773674755404  |

|   |                  |                    |                  |
|---|------------------|--------------------|------------------|
| N | 7.20001256454939 | -14.47266664248786 | 5.85982042997620 |
| H | 8.17896182526005 | -14.41550741329112 | 6.10882243960569 |
| H | 6.50786219525036 | -14.19594969889538 | 6.54545230150096 |

The Cartesian coordinates for stationary points concerning the AHA inhibition (**1**) process optimized at the UB3LYP-D3BJ/def2-SVP level

**<sup>1</sup>TS1<sub>QM</sub>** (with 286i cm<sup>-1</sup>)

|   |                   |                    |                   |
|---|-------------------|--------------------|-------------------|
| N | 6.48058970338009  | -10.78709673047553 | -0.08177846261921 |
| H | 7.24006319413779  | -10.43734512172524 | -0.65287671723555 |
| C | 5.54206462817206  | -10.01846780526054 | 0.58379622125806  |
| C | 6.19106765493835  | -12.09529370832300 | 0.12784700025362  |
| H | 6.76615186149511  | -12.94595933425911 | -0.23874378920373 |
| N | 5.12133486394717  | -12.19128412193395 | 0.89596067632324  |
| C | 4.69915847279159  | -10.91484562541362 | 1.19179750100505  |
| H | 3.83176906456528  | -10.74561958265777 | 1.82376288724993  |
| N | 0.96636998970666  | -13.79803554313503 | -1.08432808379496 |
| H | 0.53504797901386  | -14.00617521881058 | -1.97739195007840 |
| C | 0.36896739114632  | -13.13679913262813 | -0.02811276989330 |
| C | 2.22641617475861  | -14.13312976563271 | -0.71936312011361 |
| H | 2.94267087985387  | -14.66958739426846 | -1.33672622522429 |
| N | 2.46057121928744  | -13.71750467823198 | 0.51386216338699  |
| C | 1.31711731359307  | -13.09351949656766 | 0.96380252372695  |
| H | 1.27875297620131  | -12.67439058517891 | 1.96494894288304  |
| C | 7.30589494091604  | -17.72410569716837 | -0.60321883524270 |
| H | 7.72304972999739  | -17.78518438417937 | 0.41470625273697  |
| H | 8.08195209485216  | -17.32121108455830 | -1.27350487420334 |
| N | 6.10271477488608  | -16.92048268398923 | -0.62988043855236 |
| H | 5.21513527252881  | -17.36349175503990 | -0.82958000507409 |
| C | 6.02649966419929  | -15.66446754268010 | -0.11213344509228 |
| O | 4.87625053415690  | -15.13583800276954 | -0.03797058492349 |
| O | 7.12085372626621  | -15.10290482321512 | 0.24737219196853  |
| N | 9.54229892208927  | -15.60605536322733 | 1.76134307808494  |
| C | 10.07107250751347 | -15.70682195624448 | 0.49256453782511  |
| C | 10.50328515940710 | -15.91568413135232 | 2.61496357970898  |
| H | 10.40039971244938 | -15.91618426511752 | 3.69755828476350  |
| N | 11.63886723740556 | -16.21721847190494 | 1.94021282951629  |
| H | 12.51836920654863 | -16.49836553923227 | 2.35900839739902  |
| C | 11.38702455960922 | -16.09025917094011 | 0.58825625361794  |
| H | 12.14390062196860 | -16.28836189367684 | -0.16542273901624 |
| N | 9.18479999607476  | -11.09518844306760 | 2.31727629083062  |

|    |                   |                    |                   |
|----|-------------------|--------------------|-------------------|
| H  | 9.88093084141748  | -10.40412144545586 | 2.06324358499369  |
| C  | 8.12694913081374  | -10.90312903181160 | 3.18593221069450  |
| C  | 9.16389688034900  | -12.38766197619911 | 1.90699476449854  |
| H  | 9.88703558303210  | -12.82606267466509 | 1.22269152632952  |
| N  | 8.14613264077185  | -13.01866838089058 | 2.46554708092760  |
| C  | 7.48564882663148  | -12.11414288777140 | 3.27028206790097  |
| H  | 6.61108203575933  | -12.39981877392794 | 3.85374732514134  |
| C  | 3.01524863674930  | -12.01641098299908 | 5.26914459188976  |
| H  | 3.37904916814124  | -12.12966818418823 | 6.29791389934602  |
| H  | 3.12099012298737  | -10.96227659233515 | 4.96422095887267  |
| C  | 3.81072687715381  | -12.88911306022767 | 4.31508766578282  |
| O  | 3.33725845066490  | -13.00583989502176 | 3.13759672754842  |
| O  | 4.87507370270662  | -13.41396125716884 | 4.72157662488595  |
| Ni | 7.62385421460336  | -14.98876454908461 | 2.25031369176695  |
| Ni | 4.24957753174450  | -13.92005898983584 | 1.51641696168491  |
| O  | 5.61546271472328  | -14.80634349591965 | 2.71098589275095  |
| H  | 5.41897172179253  | -14.35874080854584 | 3.59748499464682  |
| C  | 7.43486811737349  | -16.38500900825325 | 4.82399040026796  |
| O  | 8.04255236622995  | -15.43985118441965 | 4.27504495419856  |
| N  | 6.64749560523741  | -17.21693238311502 | 4.13816631536826  |
| H  | 6.12616218896068  | -17.96301149471729 | 4.58959370581927  |
| O  | 6.40111380080191  | -17.03859288964757 | 2.80822068537635  |
| H  | 5.79438633965633  | -16.06167548594097 | 2.77022478222005  |
| C  | 7.55429048620157  | -16.62532363106370 | 6.30274215810571  |
| H  | 7.09991057668241  | -15.76948808003688 | 6.82550486498191  |
| H  | 7.06267240800375  | -17.55123219150657 | 6.63212127259451  |
| H  | 1.94562346343289  | -12.26534910505753 | 5.21076998810146  |
| H  | 7.06053012012811  | -18.73970344871631 | -0.94242185244263 |
| H  | 9.45241589507448  | -15.50674915056604 | -0.37714658082295 |
| H  | -0.65209299843884 | -12.76941123924505 | -0.07450182323456 |
| H  | 5.55439114248181  | -8.93274125135520  | 0.55964188951501  |
| H  | 7.93046600564071  | -9.94706832951006  | 3.66194348358072  |
| H  | 8.61793001463369  | -16.65738300793431 | 6.57948533443763  |

**<sup>1</sup>Intqm**

|   |                  |                    |                   |
|---|------------------|--------------------|-------------------|
| N | 6.50232420469130 | -10.82984015763782 | -0.02280313633940 |
| H | 7.30311601750381 | -10.52026590402343 | -0.55953713935747 |
| C | 5.55790400128349 | -10.01462087607458 | 0.57496856264179  |
| C | 6.16986398330352 | -12.12167240514083 | 0.21503021034635  |
| H | 6.73669869707934 | -13.00277424770528 | -0.09045585949418 |
| N | 5.06283306937843 | -12.16408405963854 | 0.93561341998029  |
| C | 4.66276707141355 | -10.86715187632708 | 1.17060586885857  |
| H | 3.76961329595566 | -10.65147941078842 | 1.75015724999071  |

---

|    |                   |                    |                   |
|----|-------------------|--------------------|-------------------|
| N  | 0.98290166132613  | -13.74178312448591 | -1.23868624210612 |
| H  | 0.59239752027732  | -13.98621513836841 | -2.14145478982559 |
| C  | 0.35891045132680  | -12.99127255797083 | -0.26057007236267 |
| C  | 2.20283639580369  | -14.10908568567148 | -0.78163184302196 |
| H  | 2.92529524671379  | -14.71582329408367 | -1.32206550193568 |
| N  | 2.38608215989915  | -13.62909543521072 | 0.43714130328144  |
| C  | 1.25020843852767  | -12.92882453067161 | 0.78154362444194  |
| H  | 1.17119632542137  | -12.45062782071195 | 1.75334553886229  |
| C  | 7.22480937286851  | -17.72233452898345 | -0.41272813365147 |
| H  | 7.62121014190120  | -17.78106606283098 | 0.61318726059482  |
| H  | 8.00129592893838  | -17.30470365231727 | -1.07217417125251 |
| N  | 6.01242994681768  | -16.93091866988729 | -0.45461253383903 |
| H  | 5.12652194128565  | -17.40341417948247 | -0.58230103141696 |
| C  | 5.92247409632130  | -15.67964864815793 | 0.06800275072054  |
| O  | 4.74965310446781  | -15.18750283955234 | 0.16593205294884  |
| O  | 6.99683754233816  | -15.07356804618091 | 0.39456811709221  |
| N  | 9.50325966287888  | -15.62873996866906 | 1.86770450378343  |
| C  | 9.99341461332754  | -15.72193756010946 | 0.58376010584489  |
| C  | 10.49855249574543 | -15.90628582474492 | 2.69121800675476  |
| H  | 10.43244368085526 | -15.88926048901588 | 3.77666104519403  |
| N  | 11.62013557963311 | -16.18415971792243 | 1.98187114164901  |
| H  | 12.52032077428935 | -16.43739772932784 | 2.37342246184936  |
| C  | 11.32147231094418 | -16.07184903857498 | 0.63820869963917  |
| H  | 12.05821880286652 | -16.25570828344991 | -0.13873054974841 |
| N  | 9.15307536954016  | -11.11750386252165 | 2.31276496260872  |
| H  | 9.86577081304781  | -10.44755550509721 | 2.04816896194020  |
| C  | 8.08024282623842  | -10.87587230932326 | 3.14931069768569  |
| C  | 9.13352830299616  | -12.43138572849689 | 1.97236709728808  |
| H  | 9.87129637179842  | -12.90831652005880 | 1.33077082295110  |
| N  | 8.10277294196865  | -13.02952070626135 | 2.54137904775272  |
| C  | 7.43241611243904  | -12.07909503826693 | 3.28276405089150  |
| H  | 6.54329531777655  | -12.32144332471097 | 3.86124178305800  |
| C  | 2.77888206517628  | -11.77039572635076 | 5.15512253290742  |
| H  | 3.08618338603286  | -11.86388246702559 | 6.20389899246648  |
| H  | 2.95517540194089  | -10.73468473502290 | 4.82093480147654  |
| C  | 3.57392137854285  | -12.71193774419035 | 4.27479859904922  |
| O  | 3.14669329585045  | -12.88160967606391 | 3.08935329476155  |
| O  | 4.60855886935580  | -13.24853788179415 | 4.75076391330326  |
| Ni | 7.58321312761982  | -15.04175309810444 | 2.43096973906782  |
| Ni | 4.10670184933393  | -13.84380639175087 | 1.53555699176328  |
| O  | 5.45906517222064  | -14.64262635817979 | 2.90854420877751  |
| H  | 5.16952660155280  | -14.15881067324031 | 3.79692752575613  |
| C  | 7.71073954165944  | -16.57290298250831 | 4.81426868213470  |

|   |                   |                    |                   |
|---|-------------------|--------------------|-------------------|
| O | 8.08699734937536  | -15.42355456019988 | 4.45489589984194  |
| N | 6.99380124716553  | -17.33714180832550 | 3.99864829265619  |
| H | 6.68829896631828  | -18.26992805094288 | 4.26428318381767  |
| O | 6.60797233227663  | -16.90568676963487 | 2.77629510907663  |
| H | 5.47980431824494  | -15.63669897954365 | 2.98740392942886  |
| C | 8.09055041137448  | -17.13246936642893 | 6.15604661540901  |
| H | 7.70214319734421  | -16.47068013516085 | 6.94504146298179  |
| H | 7.70803513729630  | -18.14996757258786 | 6.31980465980732  |
| H | 1.70279253367014  | -11.96903569176455 | 5.04875027973793  |
| H | 6.99460977781292  | -18.73663839262170 | -0.76654489175223 |
| H | 9.34362732174751  | -15.53875336975251 | -0.26671354587469 |
| H | -0.63970494664612 | -12.58361418562212 | -0.38819639443232 |
| H | 5.60108574392909  | -8.93099479542372  | 0.51672397741569  |
| H | 7.87817732252058  | -9.89543779593527  | 3.57017976828786  |
| H | 9.18740764709437  | -17.14248965336774 | 6.24990652783520  |

**<sup>1</sup>H**

|   |                   |                    |                   |
|---|-------------------|--------------------|-------------------|
| N | 6.24734621811934  | -10.94357677979554 | 0.04351294086528  |
| H | 7.00567051140577  | -10.60036273788162 | -0.53334383507498 |
| C | 5.27698156364946  | -10.17196293081819 | 0.65458578864507  |
| C | 6.00270702559346  | -12.24633285777512 | 0.33039423217394  |
| H | 6.62072463294675  | -13.08513423858195 | 0.01166726096536  |
| N | 4.92917219087124  | -12.33926728572648 | 1.09479576030838  |
| C | 4.45945090811840  | -11.06247525082357 | 1.30546553475431  |
| H | 3.56770425483262  | -10.88072706962985 | 1.89786102317023  |
| N | 1.00308526487530  | -13.80256569284166 | -1.14858857777329 |
| H | 0.65562883854085  | -13.98638691536194 | -2.08242452045567 |
| C | 0.31082710790192  | -13.17102529504542 | -0.13419130415123 |
| C | 2.22424766836712  | -14.15229351866536 | -0.67505496565256 |
| H | 2.99226693873314  | -14.67504272528302 | -1.23847940851966 |
| N | 2.34399024503975  | -13.77419541539587 | 0.58451066151416  |
| C | 1.16404119830485  | -13.16039884298297 | 0.94199114539428  |
| H | 1.03053739108246  | -12.76921847669257 | 1.94582114356912  |
| C | 7.20419876574268  | -17.20761028651208 | -1.62171893981801 |
| H | 7.78818097179412  | -17.64628652153775 | -0.79586211964104 |
| H | 7.85186392647048  | -16.48310336399544 | -2.14413847843591 |
| N | 5.98428384044149  | -16.59304422565572 | -1.14886023708596 |
| H | 5.08949491990891  | -16.95624093737646 | -1.45021755227952 |
| C | 5.94210998944973  | -15.63773787254889 | -0.17482035175279 |
| O | 4.80643000460264  | -15.22781967629309 | 0.18607610057842  |
| O | 7.07464622989483  | -15.21977190895676 | 0.26189202863413  |
| N | 9.41448652789941  | -15.86541438947341 | 1.85624311244131  |
| C | 10.03878691636343 | -16.06598669896497 | 0.64408387276388  |

|    |                   |                    |                   |
|----|-------------------|--------------------|-------------------|
| C  | 10.20933239498503 | -16.35016033038512 | 2.79756547721344  |
| H  | 9.98145470425658  | -16.34739294724841 | 3.86169241795167  |
| N  | 11.32968134349665 | -16.85734090656264 | 2.23185685068984  |
| H  | 12.09254239823260 | -17.30216360293009 | 2.73034186745848  |
| C  | 11.24380428800221 | -16.68785372837260 | 0.86366433721304  |
| H  | 12.02381622520803 | -17.02245414699750 | 0.18569799207379  |
| N  | 9.39863364732019  | -11.26026867824389 | 2.61325289555799  |
| H  | 10.19316888763594 | -10.63978760245114 | 2.50666066137720  |
| C  | 8.20709373425098  | -10.95572956226796 | 3.24280700093433  |
| C  | 9.33923053791842  | -12.54898527755287 | 2.19732658945809  |
| H  | 10.14501871747478 | -13.06400628383194 | 1.67873021302883  |
| N  | 8.17094932563849  | -13.07434433969600 | 2.52430472859927  |
| C  | 7.44798263029882  | -12.09740995151497 | 3.18010296665827  |
| H  | 6.44329635979087  | -12.26819785793021 | 3.55776410734832  |
| C  | 2.22146119773538  | -11.44800653269918 | 4.84920224037626  |
| H  | 2.55197299836926  | -10.95726234053206 | 5.77267828181511  |
| H  | 2.04628712420890  | -10.69090341025709 | 4.06813497459078  |
| C  | 3.25141216505485  | -12.45494013486027 | 4.36734206734713  |
| O  | 2.94305356563791  | -13.11688479009273 | 3.32103561038997  |
| O  | 4.31718155221017  | -12.58395798732917 | 5.00829626067668  |
| Ni | 7.56178082786405  | -15.03107207238295 | 2.23898046820246  |
| Ni | 4.04348159416642  | -14.08822865313552 | 1.76668329204805  |
| O  | 3.09966770084450  | -15.80775160744574 | 2.75792512380687  |
| H  | 2.67023721196408  | -15.22652007492865 | 3.41043797178771  |
| C  | 6.79677516667720  | -15.06805120758875 | 4.90752586424828  |
| O  | 7.77557921630780  | -15.55781887970351 | 4.27500381669381  |
| N  | 5.70070791111209  | -14.66828540701917 | 4.27592208003011  |
| H  | 5.06734176325136  | -13.89570374986011 | 4.65662816102157  |
| O  | 5.69122754953533  | -14.76418843332431 | 2.90285464818020  |
| H  | 3.89689256646232  | -16.13137736533295 | 3.20690852873185  |
| C  | 6.81778471143847  | -14.91522310106312 | 6.40009629890454  |
| H  | 7.73675869547554  | -14.38521986834747 | 6.69136159501126  |
| H  | 5.94227558773089  | -14.36293474657341 | 6.76722509777882  |
| H  | 1.26042240513715  | -11.95743640885596 | 5.01935935100098  |
| H  | 6.94966399409688  | -18.00780353047260 | -2.33001898484299 |
| H  | 9.56041562857367  | -15.76443403001776 | -0.28299986181342 |
| H  | -0.70148445178808 | -12.79931064867507 | -0.26375421335229 |
| H  | 5.24851990943411  | -9.09000621171300  | 0.56446839121531  |
| H  | 8.00684432234360  | -9.98004009308200  | 3.67570108569724  |
| H  | 6.84694769069401  | -15.91037494410082 | 6.87112928975310  |

<sup>1</sup>P<sub>QM</sub>

|   |                  |                    |                   |
|---|------------------|--------------------|-------------------|
| N | 6.24719580033007 | -10.89121071324073 | -0.01403437983888 |
|---|------------------|--------------------|-------------------|



---

|   |                   |                    |                   |
|---|-------------------|--------------------|-------------------|
| H | 7.00806199407753  | -10.52114419096420 | -0.57052004249168 |
| C | 5.23720524813207  | -10.15416912018033 | 0.57589849481385  |
| C | 6.04994841723524  | -12.19893043174436 | 0.27631858225807  |
| H | 6.70796234118060  | -13.01331672772593 | -0.02424269727505 |
| N | 4.96507477045500  | -12.32905686373274 | 1.02309918310679  |
| C | 4.44363168715909  | -11.06968753007595 | 1.21906988565323  |
| H | 3.54694208351416  | -10.90368811703487 | 1.80773624049173  |
| N | 1.10594549711415  | -13.74586454661482 | -1.02383624594464 |
| H | 0.79088492700521  | -13.66898021242298 | -1.98391306973526 |
| C | 0.30623401288059  | -13.69240571124052 | 0.10141401626860  |
| C | 2.38559180528147  | -13.93010361622676 | -0.62562775291618 |
| H | 3.23860418553517  | -14.03243074448767 | -1.29090692333734 |
| N | 2.44307190047110  | -13.99151672590824 | 0.69530523666666  |
| C | 1.15372821735141  | -13.84419531524992 | 1.17083238116650  |
| H | 0.91818265750979  | -13.90357430032937 | 2.23296632015298  |
| C | 7.39687452231242  | -17.17256389803803 | -1.65942866563212 |
| H | 7.95611877765187  | -17.60392023826026 | -0.81346495963036 |
| H | 8.06123720804850  | -16.45724695996056 | -2.17400426696358 |
| N | 6.16920929926258  | -16.54842887539333 | -1.21999662640933 |
| H | 5.28063408343769  | -16.86972161769321 | -1.58165307310864 |
| C | 6.10915284332724  | -15.59084644548758 | -0.25344982263379 |
| O | 4.96048102960713  | -15.16025970089148 | 0.06018459234118  |
| O | 7.22508812307751  | -15.18582201907044 | 0.22690496437430  |
| N | 9.53053037054988  | -15.83421118674111 | 1.92930608295839  |
| C | 10.19613923244764 | -16.06315523512718 | 0.74445260801932  |
| C | 10.30948951648545 | -16.25891992792612 | 2.91199303633840  |
| H | 10.05366242380005 | -16.21647578405853 | 3.96892753044121  |
| N | 11.45958585554177 | -16.75505410514231 | 2.39940413666703  |
| H | 12.22017889860866 | -17.15572249255500 | 2.93740286944007  |
| C | 11.41074970456928 | -16.64093819493768 | 1.02383082465074  |
| H | 12.22004907516414 | -16.97866314827640 | 0.38280314959356  |
| N | 9.48913668165370  | -11.24394758991844 | 2.43780802115314  |
| H | 10.28094553084668 | -10.62583938691644 | 2.30219660725210  |
| C | 8.31224732928116  | -10.93015171587995 | 3.09160088848351  |
| C | 9.42342271933766  | -12.53988955909618 | 2.04887373593124  |
| H | 10.21827713356763 | -13.06337138325581 | 1.52223897116832  |
| N | 8.26330553163284  | -13.05907486511988 | 2.41743992631594  |
| C | 7.55167880535594  | -12.07332135117683 | 3.07358264640248  |
| H | 6.54486066562038  | -12.22849693711781 | 3.46982401812549  |
| C | 2.37827830723496  | -11.87445858984780 | 4.78183767136127  |
| H | 2.70082506822363  | -11.07274303356759 | 5.45713877336745  |
| H | 1.74118313980268  | -11.44903811392497 | 3.98814455269821  |
| C | 3.57951683298360  | -12.53498512184819 | 4.13407220072336  |

|    |                   |                    |                   |
|----|-------------------|--------------------|-------------------|
| O  | 3.31906754845755  | -13.64180154972630 | 3.47705956728812  |
| O  | 4.70154153369832  | -12.04696596230649 | 4.22207653752383  |
| Ni | 7.67132247834019  | -15.00822900863198 | 2.22155758414308  |
| Ni | 4.24884571699693  | -14.11905225502229 | 1.68966538652588  |
| O  | 0.89379948524415  | -14.61176544005031 | 4.27449899700167  |
| H  | 0.80178984534594  | -15.55421245329490 | 4.08381520464399  |
| C  | 6.69619848339346  | -15.18937527271994 | 4.85022869561179  |
| O  | 7.81467016870625  | -15.39463089465686 | 4.30390031385670  |
| N  | 5.61418785810140  | -15.01790324008071 | 4.10750854710918  |
| H  | 4.69915099677399  | -14.68851447829563 | 4.42360983050400  |
| O  | 5.73266484515400  | -15.02715729563022 | 2.75121647291871  |
| H  | 1.81139884953335  | -14.38637903608930 | 4.00279518426788  |
| C  | 6.53785892520263  | -15.13540059419229 | 6.33994418774718  |
| H  | 7.18587654352975  | -14.33912573656068 | 6.73570332952005  |
| H  | 5.50073793867004  | -14.94034329564703 | 6.64431703546909  |
| H  | 1.75609590000867  | -12.61221331375874 | 5.30751119765947  |
| H  | 7.15507682081333  | -17.98049709453036 | -2.36314436568791 |
| H  | 9.73955009856592  | -15.80730897550694 | -0.20721752863471 |
| H  | -0.77060751197283 | -13.56161790280104 | 0.04618825643439  |
| H  | 5.17106326801973  | -9.07410421504620  | 0.48431535605630  |
| H  | 8.11993633034705  | -9.94612759390646  | 3.50898471559451  |
| H  | 6.87383753240407  | -16.08768434713492 | 6.77736226197828  |

The Cartesian coordinates for stationary points concerning the HU inhibition (**2**) process optimized at the UB3LYP-D3BJ/def2-SVP level

<sup>2</sup>TS1<sub>QM</sub> (with 433i cm<sup>-1</sup>)

|   |                  |                    |                   |
|---|------------------|--------------------|-------------------|
| N | 6.50508333925994 | -10.84055635462528 | 0.14678895173488  |
| H | 7.26717477998878 | -10.46037471098229 | -0.40081393963303 |
| C | 5.56613474581353 | -10.10948621419466 | 0.85278541519749  |
| C | 6.21503386249420 | -12.15815324872705 | 0.28354918530623  |
| H | 6.79080824158810 | -12.98812555770880 | -0.12703372933306 |
| N | 5.14415107092471 | -12.29618900787862 | 1.04375745007519  |
| C | 4.72183770129882 | -11.03772969826673 | 1.40881542022660  |
| H | 3.85259648934729 | -10.90369584212953 | 2.04658572880098  |
| N | 0.98696735037118 | -13.77875024495629 | -1.04575103963208 |
| H | 0.55698656702016 | -13.94297053634459 | -1.94851329059797 |
| C | 0.39175807129497 | -13.16017947671671 | 0.03726704253294  |
| C | 2.24294818360818 | -14.14062400200539 | -0.69228017489165 |
| H | 2.95657652350985 | -14.65516771433858 | -1.33087314231256 |

---

|    |                   |                    |                   |
|----|-------------------|--------------------|-------------------|
| N  | 2.47662479250177  | -13.78290431642504 | 0.55894242417354  |
| C  | 1.33684853987738  | -13.16996521595797 | 1.03294708760478  |
| H  | 1.29837986539243  | -12.79691768213191 | 2.05210443136927  |
| C  | 7.33054652696816  | -17.69621476364566 | -0.83537929005657 |
| H  | 7.73921339177025  | -17.84755597997230 | 0.17659445260204  |
| H  | 8.10856327212044  | -17.22807111143683 | -1.45897998869721 |
| N  | 6.12182862254416  | -16.90094988720857 | -0.80022416078733 |
| H  | 5.23628076477909  | -17.33995624536594 | -1.01722693871667 |
| C  | 6.03496219729191  | -15.69625255883277 | -0.17290103964347 |
| O  | 4.87764176556902  | -15.19259379958154 | -0.04559305404195 |
| O  | 7.12377413734854  | -15.15080988752697 | 0.22392454232815  |
| N  | 9.55253852438518  | -15.79088722688687 | 1.69583837429144  |
| C  | 10.08156976521917 | -15.80159763532525 | 0.42351915221678  |
| C  | 10.50206921322955 | -16.19681964437129 | 2.52121251746618  |
| H  | 10.39569291370818 | -16.28487448835250 | 3.59984894136411  |
| N  | 11.63069794055273 | -16.47374153640145 | 1.82404162419671  |
| H  | 12.50067241625794 | -16.81328203361638 | 2.21857076469859  |
| C  | 11.38609818888786 | -16.22845342005674 | 0.48718119927486  |
| H  | 12.13907549750348 | -16.38477759329770 | -0.28010828421212 |
| N  | 9.22933876539383  | -11.30784529358469 | 2.49949892293586  |
| H  | 9.93310097000074  | -10.61102944082507 | 2.28550583301018  |
| C  | 8.16602245126718  | -11.15051819988641 | 3.36876104894518  |
| C  | 9.20171537613912  | -12.57858647034226 | 2.02589175294204  |
| H  | 9.92718732667122  | -12.98827338821972 | 1.32642310109206  |
| N  | 8.17493690349000  | -13.22825862705362 | 2.54469430486476  |
| C  | 7.51496942275665  | -12.35913907362450 | 3.38820353271852  |
| H  | 6.63220440330510  | -12.66523547468789 | 3.94878340870800  |
| C  | 3.03312004373745  | -12.26453058813720 | 5.36931779566212  |
| H  | 3.36994090420101  | -12.43958716703947 | 6.39879617152440  |
| H  | 3.19278868574673  | -11.20262557802209 | 5.11866773236993  |
| C  | 3.81615500252983  | -13.12353030521211 | 4.39188549469597  |
| O  | 3.33658929129982  | -13.20894584494500 | 3.21396778314536  |
| O  | 4.87813860944275  | -13.66392108781161 | 4.78145669947242  |
| Ni | 7.63677752863761  | -15.18606447231703 | 2.23193438032534  |
| Ni | 4.25878401282736  | -14.05259871255407 | 1.56150205471644  |
| O  | 5.60627726477356  | -15.00880920218701 | 2.73083699956979  |
| H  | 5.41527951272089  | -14.60134230675650 | 3.63675528670898  |
| C  | 7.55901482797524  | -16.80181201402711 | 4.66296259313040  |
| O  | 8.09133467639959  | -15.75441396623261 | 4.23272858357615  |
| N  | 6.77305981839996  | -17.57129949065026 | 3.88604625806468  |
| H  | 6.31517134236246  | -18.41626646145459 | 4.21039085073472  |
| O  | 6.48568633175815  | -17.19206568269965 | 2.59991642899057  |
| N  | 7.81003991943070  | -17.23725386470634 | 5.93423848551082  |

|   |                   |                    |                   |
|---|-------------------|--------------------|-------------------|
| H | 7.20140963831402  | -17.92034530410677 | 6.36945213929792  |
| H | 8.20103517747120  | -16.53694433148160 | 6.55357094600690  |
| H | 5.81306052961099  | -16.22922041818230 | 2.70229600129192  |
| H | 1.95556410161953  | -12.46303516231092 | 5.27752932239461  |
| H | 7.09544910104070  | -18.67731943648053 | -1.27020456936853 |
| H | 9.47034815380780  | -15.51573331947312 | -0.42727371388601 |
| H | -0.62596534275252 | -12.78220404037646 | 0.00454213470477  |
| H | 5.57881018251754  | -9.02408757052622  | 0.88863734884469  |
| H | 7.97232309467633  | -10.21724578881596 | 3.88905998439374  |

## <sup>2</sup>IntQM

|   |                   |                    |                   |
|---|-------------------|--------------------|-------------------|
| N | 6.47100431533949  | -10.80764080219761 | -0.03023853090243 |
| H | 7.25105484797776  | -10.47127060224601 | -0.58129269946400 |
| C | 5.51057008216510  | -10.02568871555553 | 0.58626713071794  |
| C | 6.18423423465287  | -12.11051121129833 | 0.20927860655706  |
| H | 6.77100428491196  | -12.97174730119026 | -0.11436214807037 |
| N | 5.09226746649067  | -12.19141235869272 | 0.94858628291994  |
| C | 4.65420533708414  | -10.90839410733315 | 1.19464849224342  |
| H | 3.76764681076191  | -10.72533833763492 | 1.79483929561722  |
| N | 0.97425162944372  | -13.76375983690412 | -1.13647797920751 |
| H | 0.56064101023433  | -14.00356893626993 | -2.03008727699785 |
| C | 0.37314445465879  | -13.02332153537328 | -0.13659485309674 |
| C | 2.20738797043706  | -14.12982436291514 | -0.71350348704954 |
| H | 2.91690200935738  | -14.73055474984909 | -1.27729031357208 |
| N | 2.42038377307914  | -13.65758861506003 | 0.50281580978801  |
| C | 1.29145480935214  | -12.96466988562941 | 0.88210905378006  |
| H | 1.23830518231663  | -12.49355227526751 | 1.85926470488322  |
| C | 7.30841684407404  | -17.66255280631080 | -0.53749900023831 |
| H | 7.68538314831786  | -17.82883652900030 | 0.48518200494586  |
| H | 8.08204242614594  | -17.13535491618064 | -1.11412384329091 |
| N | 6.07226385704167  | -16.90865524070590 | -0.51864838261705 |
| H | 5.19737505452939  | -17.40364632581086 | -0.63581811161397 |
| C | 5.96371833490564  | -15.67164998426231 | 0.03042155721548  |
| O | 4.78106376175764  | -15.21531534893625 | 0.17439337128245  |
| O | 7.02964633413508  | -15.04157061486174 | 0.34334284761864  |
| N | 9.53469738311916  | -15.64975581602897 | 1.81597845835126  |
| C | 10.03646767807949 | -15.68915233929244 | 0.53414530513890  |
| C | 10.49450654419907 | -16.05288472146780 | 2.62845788256797  |
| H | 10.41729992838510 | -16.10733537678363 | 3.71196911638822  |
| N | 11.60546828695111 | -16.35952744898047 | 1.91351047162908  |
| H | 12.48017788174554 | -16.69974111697590 | 2.29646267297515  |
| C | 11.33581527297248 | -16.13519790782634 | 0.57795865220570  |
| H | 12.06995907092031 | -16.31596923992096 | -0.20211900694173 |

|    |                   |                    |                   |
|----|-------------------|--------------------|-------------------|
| N  | 9.10207802888119  | -11.11884431143936 | 2.34357657954151  |
| H  | 9.79392080430615  | -10.42598479028192 | 2.08297647334371  |
| C  | 8.03609749175504  | -10.92163589803092 | 3.20076581162989  |
| C  | 9.11131185251472  | -12.42584434468408 | 1.97810120961664  |
| H  | 9.85321247570020  | -12.87203450274728 | 1.31931810386085  |
| N  | 8.10482544029971  | -13.06131274069497 | 2.54975777120926  |
| C  | 7.42222020806178  | -12.14406805099880 | 3.32070328630969  |
| H  | 6.55049359724245  | -12.42072815770307 | 3.91056289434264  |
| C  | 2.92494143840445  | -11.78759557485321 | 5.20453364447546  |
| H  | 3.21655217922386  | -11.90158914672573 | 6.25588196532941  |
| H  | 3.16203635226914  | -10.76194742759473 | 4.87662814980318  |
| C  | 3.67530770603076  | -12.76943844058047 | 4.32630568415851  |
| O  | 3.25260025621171  | -12.90146571306470 | 3.13450996846635  |
| O  | 4.66950724332685  | -13.36875980055408 | 4.81048476735045  |
| Ni | 7.62101675403694  | -15.07522050245871 | 2.38853736728087  |
| Ni | 4.17383450766188  | -13.88985365508082 | 1.56326193822880  |
| O  | 5.46847046137336  | -14.77045739894475 | 2.92749851215887  |
| H  | 5.21521057344715  | -14.31240963362518 | 3.82923653264275  |
| C  | 7.76948937082460  | -16.62734769209515 | 4.76710546739103  |
| O  | 8.11432376331059  | -15.46241971414557 | 4.43663199184839  |
| N  | 7.14181004907929  | -17.43119356922088 | 3.89489920978407  |
| H  | 6.78496943639900  | -18.34925565044696 | 4.13867989037705  |
| O  | 6.73397155259715  | -16.94132214756009 | 2.67998179703455  |
| H  | 5.58649777740155  | -15.76819968858253 | 2.95221281909067  |
| N  | 8.09722925400318  | -17.12011915845029 | 5.99686532435768  |
| H  | 7.66807900306289  | -17.95966124837193 | 6.36069814669438  |
| H  | 8.43069173459912  | -16.43582870025918 | 6.66201710919791  |
| H  | 1.84018906200798  | -11.92473693397397 | 5.08880351482083  |
| H  | 7.12403651613706  | -18.63126994908916 | -1.02154142999713 |
| H  | 9.41177012289906  | -15.41521722949016 | -0.31065639230448 |
| H  | -0.62991992126730 | -12.61851098401197 | -0.23519809535571 |
| H  | 5.51800563859165  | -8.94100955010498  | 0.53199892761883  |
| H  | 7.81327194406377  | -9.95451577737109  | 3.64151484592990  |

**<sup>2</sup>P<sub>QM</sub>**

|   |                  |                    |                   |
|---|------------------|--------------------|-------------------|
| N | 6.22224677426553 | -10.88592408410181 | 0.14690987904847  |
| H | 6.95680914083131 | -10.47256184208607 | -0.41454993478405 |
| C | 5.23441627579730 | -10.19890161202054 | 0.82762983314810  |
| C | 6.04096133200838 | -12.21249741987228 | 0.35047776420083  |
| H | 6.68912928437170 | -13.00056093134600 | -0.02991478564506 |
| N | 4.98864094442639 | -12.40184086258369 | 1.12913563435077  |
| C | 4.47003718868337 | -11.16317476100522 | 1.43456983395699  |

---

|    |                   |                    |                   |
|----|-------------------|--------------------|-------------------|
| H  | 3.58803226001377  | -11.04801150105674 | 2.05679875680971  |
| N  | 1.16121500210543  | -13.75059869397738 | -1.04802239466248 |
| H  | 0.85258314382957  | -13.66947943883248 | -2.00980638950589 |
| C  | 0.36102698361405  | -13.65585065296752 | 0.07390589092925  |
| C  | 2.43075358733238  | -13.98572336606403 | -0.64441992222701 |
| H  | 3.28158324087972  | -14.12751273783959 | -1.30493188082233 |
| N  | 2.48214033032766  | -14.04052857138976 | 0.67743482999823  |
| C  | 1.19862791964817  | -13.83539476890389 | 1.14688071173104  |
| H  | 0.95551324452358  | -13.87321375049940 | 2.20779661015421  |
| C  | 7.44270707296296  | -17.14487334067461 | -1.74532799894549 |
| H  | 7.97929568378723  | -17.61516616488777 | -0.90527618819486 |
| H  | 8.12344661217577  | -16.41553098140226 | -2.21658489005847 |
| N  | 6.21081167699004  | -16.52588638736377 | -1.30971892256439 |
| H  | 5.32586400975209  | -16.84660881619298 | -1.68069084285459 |
| C  | 6.13960168365914  | -15.60030853018226 | -0.31379718539138 |
| O  | 4.98800321581605  | -15.17759090709210 | 0.00018004416934  |
| O  | 7.24813657328989  | -15.20813360928716 | 0.19290055685132  |
| N  | 9.50223922880176  | -15.87881219135429 | 1.94584993269633  |
| C  | 10.18526050605565 | -16.10827550620303 | 0.77103570804722  |
| C  | 10.28126212447367 | -16.27010247212754 | 2.94186765720223  |
| H  | 10.01565082699662 | -16.21695846140371 | 3.99573225230711  |
| N  | 11.44811839172322 | -16.74584690233688 | 2.44792365278592  |
| H  | 12.21215998626742 | -17.12115417635788 | 2.99909654120381  |
| C  | 11.41046747705895 | -16.65263773342862 | 1.07058928986089  |
| H  | 12.23385209815355 | -16.98039736150998 | 0.44246318978958  |
| N  | 9.33855745525113  | -11.27030336029309 | 2.31535638318647  |
| H  | 10.09048632471479 | -10.62407737721906 | 2.10464398585183  |
| C  | 8.24199644354385  | -11.01195671810870 | 3.11690438425362  |
| C  | 9.26752132164140  | -12.56114982830415 | 1.90728268309464  |
| H  | 10.00802453172675 | -13.04668009552270 | 1.27526576043840  |
| N  | 8.18122411649362  | -13.12823259921847 | 2.40361138265329  |
| C  | 7.52511319089537  | -12.18194089551551 | 3.16589748792121  |
| H  | 6.58474322388727  | -12.38738030929517 | 3.68227258744998  |
| C  | 2.49298557371499  | -11.85457115642401 | 4.74886256800930  |
| H  | 2.83057457077276  | -11.09120260307365 | 5.46017498387183  |
| H  | 2.01418396317047  | -11.37496498311249 | 3.87959189101604  |
| C  | 3.65816348980438  | -12.70576146964812 | 4.28149644905286  |
| O  | 3.34295620918294  | -13.67318820170088 | 3.46299512267196  |
| O  | 4.80518586354869  | -12.49381407391514 | 4.68300719246003  |
| Ni | 7.62109040444713  | -15.09425979408026 | 2.20724180872589  |
| Ni | 4.28077243442832  | -14.22835820966501 | 1.68396318185917  |
| O  | 0.85182883797171  | -14.52192233223744 | 4.26081585514814  |
| H  | 0.71507226041295  | -15.46733503373318 | 4.11672405937248  |

|   |                   |                    |                   |
|---|-------------------|--------------------|-------------------|
| C | 6.64343997602481  | -15.14318207842607 | 4.81709689850096  |
| O | 7.77753240669924  | -15.35029988436288 | 4.31324854543517  |
| N | 5.52749323342708  | -15.29631229493987 | 4.07599301796360  |
| H | 4.65362319146270  | -14.84063731236447 | 4.34228496407583  |
| O | 5.68635408015762  | -15.26913593215047 | 2.70258617092425  |
| H | 1.78134130835063  | -14.35807042493046 | 3.99224207982940  |
| H | 1.72143151824135  | -12.49554467394009 | 5.20101398100348  |
| H | 7.20979448331167  | -17.92152728446223 | -2.48620790770540 |
| H | 9.73183620229674  | -15.87625529764817 | -0.18817763691941 |
| H | -0.70925313206799 | -13.48067162805525 | 0.01443561900868  |
| H | 5.15893172398083  | -9.11562969275924  | 0.81289935320513  |
| H | 8.07059220376319  | -10.04345669534884 | 3.57742500814099  |
| N | 6.47479238253552  | -14.81217979180416 | 6.12481341767967  |
| H | 7.33153403194769  | -14.63466507872245 | 6.63503599170001  |
| H | 5.69675741363729  | -14.19567026266531 | 6.34361101653494  |

The Cartesian coordinates for stationary points concerning the HU inhibition (**2'**) process optimized at the UB3LYP-D3BJ/def2-SVP level

## **2'R**

|   |                  |                    |                   |
|---|------------------|--------------------|-------------------|
| N | 5.77853009633164 | -10.59309064935771 | 0.10855626829553  |
| H | 6.39139896077956 | -10.05511339007169 | -0.49208719324595 |
| C | 4.62588518349738 | -10.13187219068020 | 0.71529565871570  |
| C | 5.95808723707909 | -11.89071897524310 | 0.45722132279359  |
| H | 6.78969314670373 | -12.52355488175686 | 0.14805839974384  |
| N | 4.97387846283506 | -12.27637851675264 | 1.25168593392263  |
| C | 4.13542556585061 | -11.19767287153017 | 1.42795139351569  |
| H | 3.25559513736804 | -11.26973904713241 | 2.06100805509026  |
| N | 1.18640720258559 | -15.16347992143547 | 0.27172109803060  |
| H | 0.68815662689751 | -15.54392640919723 | -0.52451710285821 |
| C | 0.61271314199569 | -14.61696903110229 | 1.40341006774211  |
| C | 2.53289323599507 | -15.10117134341114 | 0.40626266701979  |
| H | 3.25452349297471 | -15.45476845041884 | -0.32469300307899 |
| N | 2.84629374738149 | -14.54561841734026 | 1.56492611529836  |
| C | 1.66233674736807 | -14.23434897938874 | 2.20155696889083  |
| H | 1.67868154540585 | -13.75420001853952 | 3.17547060078653  |
| C | 7.90719337349922 | -16.19510582148127 | -1.78631116214871 |
| H | 8.66649431488510 | -16.71084810802333 | -1.17361791413348 |
| H | 8.31364216115856 | -15.21309087642710 | -2.06966515651923 |
| N | 6.65065758759806 | -16.04207851996791 | -1.08467932291792 |
| H | 5.89585013448969 | -16.68762662635708 | -1.27732090860816 |
| C | 6.51629481310694 | -15.28586916124865 | 0.03926174828522  |
| O | 5.41414487482277 | -15.36371605268506 | 0.66994063716475  |

---

|    |                   |                    |                   |
|----|-------------------|--------------------|-------------------|
| O  | 7.49880675101492  | -14.53469019827217 | 0.35436215770352  |
| N  | 9.93688160608177  | -15.36746394974019 | 1.72352977340930  |
| C  | 10.62715614097636 | -15.16581734226454 | 0.54873330417386  |
| C  | 10.52311295344619 | -16.36821599790260 | 2.35510043634795  |
| H  | 10.17733261285643 | -16.79933874100298 | 3.29118557514784  |
| N  | 11.58013990740051 | -16.81401975527466 | 1.63534506212998  |
| H  | 12.19209484686663 | -17.57950896099468 | 1.89470820963278  |
| C  | 11.66537820012277 | -16.06290127762325 | 0.47960770336163  |
| H  | 12.42945867963966 | -16.23573481241403 | -0.27285522641046 |
| N  | 10.11127787585760 | -10.87042858154039 | 2.48024453349020  |
| H  | 10.93054161692204 | -10.28876256767792 | 2.34681414867187  |
| C  | 8.90407845769296  | -10.46865074230501 | 3.01828296928008  |
| C  | 10.02529717265622 | -12.18970624654954 | 2.19048637057675  |
| H  | 10.83881281385307 | -12.77106607902214 | 1.76438248714325  |
| N  | 8.82446845397745  | -12.64815384519345 | 2.50990105667579  |
| C  | 8.10800352161028  | -11.58665914549788 | 3.03168962912539  |
| H  | 7.09868466532827  | -11.70557939090719 | 3.42229610833553  |
| C  | 3.47666898302053  | -11.72809214449873 | 5.66398364709522  |
| H  | 2.69264226132980  | -12.39981348484599 | 6.04402703037844  |
| H  | 4.04155770061643  | -11.29086165027535 | 6.49677960580799  |
| C  | 4.40260452017658  | -12.47656055492312 | 4.71834433710090  |
| O  | 3.81940836901733  | -13.19831941331291 | 3.83483273679858  |
| O  | 5.63514477334346  | -12.33898822832689 | 4.83703609253081  |
| Ni | 8.11112549931733  | -14.57965795467288 | 2.27705985131255  |
| Ni | 4.75988728586939  | -14.05174080628634 | 2.22718389769212  |
| O  | 6.44601698659491  | -14.27203650066510 | 3.21592165168531  |
| H  | 6.36392415074489  | -13.57210712794423 | 3.90820423516222  |
| C  | 6.65787841803835  | -16.86834932020874 | 3.25324375853491  |
| O  | 7.56434034687100  | -16.71548361495684 | 2.42698746609496  |
| N  | 6.88434094764246  | -16.79101193118899 | 4.62907462525884  |
| N  | 5.39527274188282  | -17.18073417285870 | 2.89467036993724  |
| H  | 6.19979922501809  | -16.18322677611199 | 5.08165978739807  |
| H  | 5.15017709490587  | -16.88647316810595 | 1.94656944302273  |
| H  | 4.66036755034399  | -17.25680933706549 | 3.58744345591432  |
| O  | 8.15972904845363  | -16.30409079657335 | 4.93509626288893  |
| H  | 8.53619255385444  | -16.98022297712066 | 5.51721078955706  |
| H  | 2.97086875193255  | -10.92071901902465 | 5.10916548698911  |
| H  | 4.26701497897387  | -9.11451120562054  | 0.58933428934589  |
| H  | -0.46338497314637 | -14.55242637447572 | 1.53662729419393  |
| H  | 7.73772033506111  | -16.77731420527371 | -2.70259342460474 |
| H  | 10.30625872440146 | -14.42030279353324 | -0.17348190310881 |
| H  | 8.72510966882272  | -9.45161244839687  | 3.35483334243319  |



**<sup>2</sup>TS1 (286i cm<sup>-1</sup>)**

|   |                   |                    |                   |
|---|-------------------|--------------------|-------------------|
| N | 5.08794456671285  | -10.24978482679576 | -0.01026938827804 |
| H | 5.56890428190464  | -9.68238900252305  | -0.69815249324509 |
| C | 4.05126582564380  | -9.83541793546807  | 0.80428156217893  |
| C | 5.35283320678351  | -11.55254623695937 | 0.26023186657851  |
| H | 6.14407398699536  | -12.15106733300393 | -0.19487139607004 |
| N | 4.53556468832100  | -11.98260391734397 | 1.20707431101987  |
| C | 3.71920842310942  | -10.93269967727179 | 1.56120315964376  |
| H | 2.96510642675361  | -11.04542017499617 | 2.33550545272265  |
| N | 0.78526413265972  | -14.83537740701545 | 0.15822745960971  |
| H | 0.24567891109001  | -15.15342100724649 | -0.63830316910430 |
| C | 0.27246186099496  | -14.40425880441114 | 1.36653327008834  |
| C | 2.13709599180032  | -14.76008733125553 | 0.21852790067291  |
| H | 2.82417905453530  | -15.03089271815648 | -0.57947562416325 |
| N | 2.50770845537961  | -14.30470727894273 | 1.40222262478474  |
| C | 1.36313468805203  | -14.07501679224807 | 2.13379528213421  |
| H | 1.42697726703561  | -13.68759325824469 | 3.14675137926743  |
| C | 7.76232690785029  | -15.91387794173420 | -1.99062238453246 |
| H | 8.37010470409984  | -15.01184805046765 | -1.85343191832443 |
| H | 7.64871444627255  | -16.10680063795461 | -3.06897779752838 |
| N | 6.47563995775911  | -15.69537185231932 | -1.37455785995496 |
| H | 5.71997731112979  | -16.34147202268932 | -1.56523760797611 |
| C | 6.24744743072821  | -14.81145782941116 | -0.35709549313715 |
| O | 5.08737335467385  | -14.80292477408355 | 0.14531195239620  |
| O | 7.21003245052872  | -14.02915170977828 | -0.02979063602732 |
| N | 9.69256449403480  | -15.37107359597561 | 0.99309534615303  |
| C | 10.67218346950847 | -14.98125990289055 | 0.10742938191182  |
| C | 9.76860805774232  | -16.68689673827373 | 1.10811830855536  |
| H | 9.08668643810019  | -17.29302322890689 | 1.70145564729801  |
| N | 10.77460418198688 | -17.15850321848994 | 0.33351217888760  |
| H | 11.04155180581251 | -18.13234847046345 | 0.24060499095055  |
| C | 11.36378154209205 | -16.09110946374173 | -0.31337612370933 |
| H | 12.19598682012230 | -16.21241226194897 | -1.00088273780558 |
| N | 10.36319349258100 | -10.96337461028672 | 2.72942548014139  |
| H | 11.22920801788012 | -10.49656394435393 | 2.97424422201084  |
| C | 9.10176443474739  | -10.40463587377066 | 2.76239741980977  |
| C | 10.24432643777109 | -12.25379379475137 | 2.33561979074910  |
| H | 11.08292902032417 | -12.93970065083841 | 2.23808654417582  |
| N | 8.97370149928539  | -12.54326407581078 | 2.11028847529975  |
| C | 8.24385597457628  | -11.40374095765543 | 2.37509160496918  |
| H | 7.16076336353465  | -11.39765252915659 | 2.29421893273608  |
| C | 3.55139439087137  | -12.39988335031991 | 6.05656421946330  |
| H | 2.69785899766579  | -13.06103220953943 | 6.27038881455193  |

|    |                   |                    |                   |
|----|-------------------|--------------------|-------------------|
| H  | 4.18584338321837  | -12.29950505546949 | 6.94576323944080  |
| C  | 4.34450601744152  | -12.94114801294061 | 4.87989702475723  |
| O  | 3.68494590773820  | -13.19839804002437 | 3.82578726816097  |
| O  | 5.58686395470313  | -13.09818702484494 | 5.01339278614704  |
| Ni | 8.08970082269906  | -14.34922236180920 | 1.75283023664547  |
| Ni | 4.46205392828809  | -13.91282795894188 | 1.97430422557140  |
| O  | 6.39368513781389  | -13.91569260621426 | 2.73893983609248  |
| H  | 6.25138700323306  | -13.44600058759519 | 3.62414221806632  |
| C  | 6.38625661500293  | -15.64397501037540 | 3.11184139778378  |
| O  | 7.07457973380060  | -16.12262819968307 | 2.15286511294847  |
| N  | 6.98338442702234  | -15.64900256583849 | 4.41164309279206  |
| N  | 4.98288967857965  | -15.90421615378630 | 3.10659929432623  |
| H  | 6.52214403047679  | -14.96578366789790 | 5.02563718162211  |
| H  | 4.79053998479839  | -16.74933756129298 | 2.57251487450619  |
| H  | 4.54208167830069  | -15.93021954591616 | 4.02461349260308  |
| O  | 8.31278585854442  | -15.15880291842635 | 4.26205129522326  |
| H  | 8.86129729398961  | -15.94352966871448 | 4.40183900343599  |
| H  | 3.13581709222756  | -11.41503165002577 | 5.79008393067073  |
| H  | 3.65298720772805  | -8.82535356231527  | 0.77343862946336  |
| H  | -0.79453847419414 | -14.37209719262842 | 1.56718737725703  |
| H  | 8.31072833489338  | -16.76481292598822 | -1.54387715102638 |
| H  | 10.79792356041315 | -13.94237051489139 | -0.18592574288379 |
| H  | 8.92894713382971  | -9.37505805688367  | 3.06189987749164  |

**<sup>2</sup>Int1**

|   |                  |                    |                   |
|---|------------------|--------------------|-------------------|
| N | 5.10666722738207 | -10.24833389428709 | 0.17252707125546  |
| H | 5.62068680417524 | -9.63756291362312  | -0.45123662159999 |
| C | 3.99912600467753 | -9.90011588893527  | 0.92151553655836  |
| C | 5.38986521962784 | -11.55416225463912 | 0.40504141448937  |
| H | 6.21867436783084 | -12.11716453849736 | -0.02899097469563 |
| N | 4.51830747063207 | -12.05162644810279 | 1.26717723984979  |
| C | 3.64519789452413 | -11.03971130418862 | 1.60133819332576  |
| H | 2.83280828884853 | -11.20457040356695 | 2.30354912979633  |
| N | 0.78172809484108 | -14.87621801974691 | 0.18002474706883  |
| H | 0.23642434402074 | -15.17990509062204 | -0.61823910203503 |
| C | 0.27851090748151 | -14.47725946940966 | 1.40266025570902  |
| C | 2.13379235200316 | -14.79316579916645 | 0.22912290423126  |
| H | 2.81231876088995 | -15.04168812520818 | -0.58301332974857 |
| N | 2.51445130836798 | -14.36307121805005 | 1.41878952054572  |
| C | 1.37518691812129 | -14.15903646193939 | 2.16615840284946  |
| H | 1.44185949433053 | -13.79680416660352 | 3.18796128674235  |
| C | 7.71424587418185 | -15.84265098939906 | -2.04184281439319 |
| H | 8.27894073173025 | -14.90504396978434 | -1.97911564365895 |

---

|    |                   |                    |                   |
|----|-------------------|--------------------|-------------------|
| H  | 7.57300627023080  | -16.10389706258722 | -3.10176575155086 |
| N  | 6.43620952006242  | -15.65623866737575 | -1.39600637361755 |
| H  | 5.69771904204631  | -16.32923574325007 | -1.55968590637736 |
| C  | 6.21645277122226  | -14.78669354258742 | -0.36679004852113 |
| O  | 5.07624092794938  | -14.81570134813855 | 0.17744424162167  |
| O  | 7.16487363868880  | -13.97707442863450 | -0.06495721686939 |
| N  | 9.70845452666966  | -15.26402906163407 | 0.88897406711295  |
| C  | 10.63941579372280 | -14.93586666573814 | -0.07089751088849 |
| C  | 9.84053581824107  | -16.55694857267235 | 1.13911650765122  |
| H  | 9.20418146034737  | -17.11364903430343 | 1.82528644112663  |
| N  | 10.83555674347911 | -17.07149634993146 | 0.37835436260628  |
| H  | 11.13884347502079 | -18.03908680800966 | 0.37980521300793  |
| C  | 11.35885983447905 | -16.05876391260989 | -0.40019485727453 |
| H  | 12.16991581331324 | -16.22288710268153 | -1.10385180656697 |
| N  | 10.33306588841466 | -10.79975232193693 | 2.47241183200448  |
| H  | 11.20481514905755 | -10.28918868821543 | 2.55777739315320  |
| C  | 9.08425201439510  | -10.34340848077064 | 2.84174113701657  |
| C  | 10.19995150994132 | -12.06130728569501 | 1.99960944625422  |
| H  | 11.03169323420725 | -12.67152305055362 | 1.65553201161697  |
| N  | 8.92995585542910  | -12.43083854395177 | 2.04115614799349  |
| C  | 8.21777897012361  | -11.37185729305666 | 2.56813956312941  |
| H  | 7.14845188572165  | -11.43210382212463 | 2.74917706321676  |
| C  | 3.64615983292024  | -11.83652404788934 | 5.70926771662257  |
| H  | 3.49054878668485  | -10.81903425213597 | 5.31297694195671  |
| H  | 2.66092987668821  | -12.27831555658232 | 5.90868182212689  |
| C  | 4.39705486366298  | -12.63697508508446 | 4.66765132510958  |
| O  | 3.72407320940280  | -13.26121846756426 | 3.80076048588492  |
| O  | 5.66436326937545  | -12.61262797007687 | 4.71131415676261  |
| Ni | 8.10467462770729  | -14.26937731013702 | 1.67732467080896  |
| Ni | 4.46042709485181  | -13.99657043853353 | 1.97097348006521  |
| O  | 6.41555490078766  | -13.95506325277838 | 2.81238194502834  |
| H  | 6.19135342367190  | -13.33689888574750 | 3.67048455757912  |
| C  | 6.42728165435530  | -15.42417271682049 | 3.14750434584428  |
| O  | 7.23914487764221  | -15.97977678101496 | 2.27661141062896  |
| O  | 8.17874335825553  | -15.11790008212282 | 4.64689322588713  |
| H  | 8.68809485111112  | -15.93241725751272 | 4.75456336492663  |
| N  | 6.84046015432526  | -15.59243026923165 | 4.53324120603536  |
| N  | 5.01779295775133  | -15.81800729793447 | 2.99137496421207  |
| H  | 6.30942530176412  | -14.95664372369245 | 5.13521857036413  |
| H  | 4.99312220113153  | -16.68959613524525 | 2.46318472786145  |
| H  | 4.53834275927694  | -15.95016151946278 | 3.88310413786205  |
| H  | 4.23328478867373  | -11.75244720592049 | 6.63301952687940  |
| H  | 3.57231794747603  | -8.90144295497276  | 0.90364156188576  |

|   |                   |                    |                   |
|---|-------------------|--------------------|-------------------|
| H | -0.78641784234543 | -14.45758343230314 | 1.61562408309889  |
| H | 8.32131193296473  | -16.63574797521092 | -1.56641304786835 |
| H | 10.71156846011260 | -13.93178241074612 | -0.48078580581783 |
| H | 8.92636635532112  | -9.35805214904907  | 3.27036598411909  |

**<sup>2</sup>TS2 (413i cm<sup>-1</sup>)**

|   |                   |                   |                   |
|---|-------------------|-------------------|-------------------|
| N | -1.17573657243196 | 3.48904018971443  | -1.55170858772536 |
| H | -0.67449500626220 | 4.09212548905642  | -2.19323634339516 |
| C | -2.28420257659649 | 3.83826636656533  | -0.80500731288205 |
| C | -0.87113145711360 | 2.19362856798372  | -1.29038950890536 |
| H | -0.03852562459423 | 1.63043140600903  | -1.71816345163606 |
| N | -1.72990975407917 | 1.70277965343471  | -0.41128796878449 |
| C | -2.61729350193652 | 2.70925397568794  | -0.09733402142977 |
| H | -3.42918699342055 | 2.54970909016766  | 0.60682349110819  |
| N | -5.45913747613453 | -1.09345169048234 | -1.49140254025796 |
| H | -6.00542378265750 | -1.39347194513539 | -2.29041587019743 |
| C | -5.96080028868184 | -0.69924622751745 | -0.26692215315652 |
| C | -4.10677920285455 | -1.01366319459593 | -1.44271832634975 |
| H | -3.42833720639751 | -1.26116653943240 | -2.25538737763682 |
| N | -3.72376009595471 | -0.58970076627811 | -0.25162486634486 |
| C | -4.86254015786737 | -0.38695313319134 | 0.49693336408582  |
| H | -4.79961911235239 | -0.03136215316142 | 1.52126481219761  |
| C | 1.48310796113513  | -2.07392094815348 | -3.72208605349446 |
| H | 2.04865563499763  | -1.13875001676282 | -3.63687369161154 |
| H | 1.35302659266990  | -2.31748591375917 | -4.78781355479117 |
| N | 0.19953104946440  | -1.89327123080538 | -3.08550872315984 |
| H | -0.53213490795752 | -2.57408887139202 | -3.24740175386448 |
| C | -0.03151887263680 | -1.01952456714511 | -2.06256229292284 |
| O | -1.17584560865091 | -1.05430905271622 | -1.52403549950196 |
| O | 0.90718450516486  | -0.20188490233189 | -1.75808446314997 |
| N | 3.45685746946884  | -1.47132887607128 | -0.79110177105489 |
| C | 4.39654764750992  | -1.12518660720931 | -1.73586065922050 |
| C | 3.58570560089650  | -2.76881428998124 | -0.56571110189006 |
| H | 2.93993092096238  | -3.33640999293776 | 0.10299241247767  |
| N | 4.58700710317175  | -3.26961532011674 | -1.32819774983622 |
| H | 4.88937274037252  | -4.23726172906199 | -1.34319995441616 |
| C | 5.11844118428152  | -2.24186386531215 | -2.08133369341968 |
| H | 5.93577794213292  | -2.39269963370066 | -2.78069688499157 |
| N | 4.05901367948068  | 2.95420576009065  | 0.84653015456151  |
| H | 4.93331497185958  | 3.45170706295088  | 0.97244303320291  |
| C | 2.79925887068395  | 3.43925846686066  | 1.13285031483792  |
| C | 3.92997197344461  | 1.68519914207352  | 0.39110257213331  |
| H | 4.76866346146052  | 1.05361452920363  | 0.10757215566398  |

|    |                   |                   |                   |
|----|-------------------|-------------------|-------------------|
| N  | 2.65368348229091  | 1.33834501623473  | 0.36589751274635  |
| C  | 1.93239866752104  | 2.41914442755343  | 0.82947911335940  |
| H  | 0.85370698518936  | 2.37705851087923  | 0.94530087893684  |
| C  | -2.48804623387201 | 2.01533470312574  | 4.02189454143436  |
| H  | -2.55197833199670 | 3.04649167483951  | 3.63593162756173  |
| H  | -3.50550589177722 | 1.65490394885257  | 4.21853557828877  |
| C  | -1.81488161919157 | 1.16524883489399  | 2.97525004939151  |
| O  | -2.50083894259756 | 0.52114766546018  | 2.15686495078881  |
| O  | -0.52697112079184 | 1.18088702151971  | 2.97814640173617  |
| Ni | 1.82721153353090  | -0.50449271674670 | 0.00080875722159  |
| Ni | -1.76220093609726 | -0.24988708815865 | 0.28464330265780  |
| O  | 0.15533376783338  | -0.23131811374851 | 1.15202111482267  |
| H  | -0.12252319131980 | 0.52215007325585  | 2.13198041856109  |
| C  | 0.17016607989138  | -1.66783411893813 | 1.44225027545261  |
| O  | 1.00220660880910  | -2.23020304771413 | 0.58066020302138  |
| O  | 1.88572508614058  | -1.43697171491545 | 3.00727213613054  |
| H  | 2.39508087368474  | -2.25742649104307 | 3.04625001384081  |
| N  | 0.55068307298705  | -1.90614362917269 | 2.83595472958825  |
| N  | -1.24120187757819 | -2.08419172837729 | 1.25597502246546  |
| H  | 0.00697804291285  | -1.29453787356620 | 3.44998584982727  |
| H  | -1.23983329481090 | -2.92732015246831 | 0.68232057676495  |
| H  | -1.71054515815156 | -2.29380436239714 | 2.13866884843040  |
| H  | -1.89328228388378 | 2.04137772060473  | 4.94449807291868  |
| H  | -2.72731393839360 | 4.82920051099606  | -0.84485954164158 |
| H  | -7.02548515006937 | -0.67877374650886 | -0.05276492172895 |
| H  | 2.08236131193529  | -2.87616835161989 | -3.25236441749350 |
| H  | 4.47458979442713  | -0.11265068945325 | -2.12342248860303 |
| H  | 2.63549155280044  | 4.43664548406558  | 1.53037525927757  |

## <sup>2</sup>Int2

|   |                  |                    |                   |
|---|------------------|--------------------|-------------------|
| N | 5.06313898758495 | -10.28093840317620 | 0.13741087214894  |
| H | 5.56292611667581 | -9.67713144737167  | -0.50458373653394 |
| C | 3.95411946131572 | -9.93363502322284  | 0.88418941737141  |
| C | 5.37064639146088 | -11.57548037394744 | 0.39948755038561  |
| H | 6.20414515375236 | -12.13746312576493 | -0.02819058495260 |
| N | 4.51305734502315 | -12.06776522703226 | 1.27899991386450  |
| C | 3.62352789876399 | -11.06301891515629 | 1.59246351538840  |
| H | 2.81183773864902 | -11.22374717240623 | 2.29658221245165  |
| N | 0.78637473342729 | -14.85428636558806 | 0.19727561990194  |
| H | 0.23972130787802 | -15.15099114478589 | -0.60272775561871 |
| C | 0.28517243282316 | -14.46210912865071 | 1.42259310280035  |
| C | 2.13889166187075 | -14.77783657726864 | 0.24663037828605  |
| H | 2.81711193547614 | -15.02472872444969 | -0.56641382342526 |

---

|    |                   |                    |                   |
|----|-------------------|--------------------|-------------------|
| N  | 2.52251021862125  | -14.35788386520527 | 1.43897977397243  |
| C  | 1.38395327967825  | -14.15441448210986 | 2.18759999495768  |
| H  | 1.44705059364613  | -13.80170607559224 | 3.21293275767088  |
| C  | 7.73120917763419  | -15.84255460813430 | -2.02862765129220 |
| H  | 8.29704199782564  | -14.90799225048712 | -1.93901186235975 |
| H  | 7.60190875824980  | -16.08166807798531 | -3.09549468195074 |
| N  | 6.44750685862368  | -15.66378388253141 | -1.39186299898448 |
| H  | 5.71617835381740  | -16.34476819180590 | -1.55452613558794 |
| C  | 6.21424985539450  | -14.78834951402053 | -0.37101914522822 |
| O  | 5.06880337358749  | -14.82306244769907 | 0.16559065173883  |
| O  | 7.15147271492903  | -13.96932244816929 | -0.06620292641112 |
| N  | 9.70200843816393  | -15.23668307980205 | 0.90091451062722  |
| C  | 10.64274892778084 | -14.88877184791212 | -0.04216725881702 |
| C  | 9.82916530767734  | -16.53499895999300 | 1.12243080658778  |
| H  | 9.18225952400894  | -17.10370860263258 | 1.78913452573862  |
| N  | 10.83035516561338 | -17.03466098686965 | 0.35903811693845  |
| H  | 11.13158891655445 | -18.00260901213637 | 0.34127076952548  |
| C  | 11.36358936780360 | -16.00522930577573 | -0.39054847614546 |
| H  | 12.18125461493648 | -16.15491767734193 | -1.08977459004403 |
| N  | 10.30203663093399 | -10.81533898622988 | 2.54908352949397  |
| H  | 11.17624773572741 | -10.31934036174797 | 2.68135120857145  |
| C  | 9.04106051032806  | -10.32803675021566 | 2.82603613878324  |
| C  | 10.17405300691021 | -12.08402272030609 | 2.09248379565055  |
| H  | 11.01362895057922 | -12.71699916811572 | 1.81468136252095  |
| N  | 8.89738856821172  | -12.42863320451533 | 2.05783030606842  |
| C  | 8.17462860450812  | -11.34656286251002 | 2.51623207307396  |
| H  | 7.09508848269058  | -11.38716092801682 | 2.62397388040041  |
| C  | 3.75748211822125  | -11.74190676695588 | 5.70895357366477  |
| H  | 3.70465312419467  | -10.70988069910626 | 5.32370047461904  |
| H  | 2.73625689933690  | -12.09389086242304 | 5.90083980325869  |
| C  | 4.42946751089058  | -12.59678831843321 | 4.66562513095156  |
| O  | 3.74513513891278  | -13.24787106218443 | 3.85241436950841  |
| O  | 5.71821412947531  | -12.57692268750717 | 4.66677525614012  |
| Ni | 8.07183536592838  | -14.27094634704599 | 1.69295756749247  |
| Ni | 4.48553573695630  | -14.02076898819269 | 1.97381312418421  |
| O  | 6.40020415345635  | -13.99937278673161 | 2.84270651377222  |
| H  | 6.12084262703977  | -13.23711287612646 | 3.82820177718513  |
| C  | 6.41675708592212  | -15.43438374451733 | 3.13360991036894  |
| O  | 7.24728712530552  | -15.99849883933373 | 2.27143627568706  |
| O  | 8.13450153912330  | -15.19944229430588 | 4.69555144151977  |
| H  | 8.64577392665562  | -16.01868240981327 | 4.73499112393469  |
| N  | 6.80012047174118  | -15.67195232680936 | 4.52709449997387  |
| N  | 5.00527894284866  | -15.85213283283212 | 2.95009832773627  |

|   |                   |                    |                   |
|---|-------------------|--------------------|-------------------|
| H | 6.25612878339787  | -15.06140622798043 | 5.14190722473765  |
| H | 5.00500942640484  | -16.69828967290811 | 2.38102632186056  |
| H | 4.53390677556681  | -16.05414264554888 | 3.83342452497385  |
| H | 4.34840999351596  | -11.72168758097495 | 6.63425990183641  |
| H | 3.50909603237122  | -8.94356835520720  | 0.84406085053408  |
| H | -0.77952428016912 | -14.43965921236419 | 1.63648016797335  |
| H | 8.32967823523533  | -16.64702848765569 | -1.56176329943957 |
| H | 10.72233875064144 | -13.87508604038795 | -0.42640594630062 |
| H | 8.87624614788975  | -9.33030628797123  | 3.22226822625925  |

**<sup>2</sup>TS3 (273i cm<sup>-1</sup>)**

|   |                   |                    |                   |
|---|-------------------|--------------------|-------------------|
| N | 5.42540695035226  | -10.23858833899128 | 0.50076452772909  |
| H | 6.02436768682033  | -9.61991622386489  | -0.03260702892458 |
| C | 4.29472941641027  | -9.86945141658988  | 1.20350787749459  |
| C | 5.59674826525299  | -11.57758219445287 | 0.63259944818088  |
| H | 6.40242459948504  | -12.16676621467567 | 0.18809595200895  |
| N | 4.63157319725375  | -12.07733757102540 | 1.38591286810878  |
| C | 3.81032211645156  | -11.03328001156569 | 1.74998040464931  |
| H | 2.93045543155753  | -11.19228515625032 | 2.36736530873703  |
| N | 0.80101769090370  | -14.60046630416295 | 0.04733572522565  |
| H | 0.26056758273129  | -14.80508512984534 | -0.78507563864983 |
| C | 0.28996896968918  | -14.29955106203296 | 1.29392099797789  |
| C | 2.15406429865916  | -14.57928865776359 | 0.12579504139119  |
| H | 2.83953795189388  | -14.78041268372683 | -0.69377357522966 |
| N | 2.53036791513852  | -14.28099789060927 | 1.35685378873808  |
| C | 1.38429491282568  | -14.10152046502923 | 2.10039682356631  |
| H | 1.43460181550565  | -13.84075258351397 | 3.15322080481472  |
| C | 7.55743104835946  | -15.78889748536351 | -2.31138287932408 |
| H | 8.09693832460541  | -14.83858100248885 | -2.41827670531392 |
| H | 7.37060870609098  | -16.20199287450682 | -3.31323208500934 |
| N | 6.29716549708149  | -15.55780693464533 | -1.64122120735046 |
| H | 5.52853151307353  | -16.19485326473420 | -1.80849368969216 |
| C | 6.17130595966206  | -14.76708189629733 | -0.53502753119718 |
| O | 5.05045774200106  | -14.77586357126078 | 0.05380413440980  |
| O | 7.18266655938319  | -14.05183013304327 | -0.21284368903933 |
| N | 9.70035196498513  | -15.33723396730465 | 0.89453355326258  |
| C | 10.55564787329399 | -15.10230556027199 | -0.15764631503296 |
| C | 10.05706287586958 | -16.48617878068420 | 1.44294192765722  |
| H | 9.53364713591454  | -16.95587337580206 | 2.27412468093037  |
| N | 11.12471594591263 | -16.99758330235605 | 0.78410819176366  |
| H | 11.58964306545210 | -17.87131139964381 | 1.00314630314866  |
| C | 11.45969390902960 | -16.13403235526333 | -0.23997851300956 |
| H | 12.28257519667375 | -16.32922879649970 | -0.92165084796761 |

|    |                   |                    |                   |
|----|-------------------|--------------------|-------------------|
| N  | 10.03847734657669 | -10.76860802335817 | 2.27556391722151  |
| H  | 10.82170375474600 | -10.13144938534631 | 2.18477848308884  |
| C  | 8.92049469092473  | -10.57732023611278 | 3.06414801663334  |
| C  | 9.92170985874199  | -11.97313580875080 | 1.66343003714909  |
| H  | 10.67113843471873 | -12.38825963681901 | 0.99325125363518  |
| N  | 8.78884966035862  | -12.55339769774691 | 2.01585742011021  |
| C  | 8.14963856224020  | -11.70092163823019 | 2.89242309121574  |
| H  | 7.20070747558298  | -11.98441433734330 | 3.33897676189912  |
| C  | 3.70485401809806  | -11.62487471016030 | 5.53540956304817  |
| H  | 4.09004059839917  | -11.54832279552985 | 6.55999435102204  |
| H  | 3.99169563002601  | -10.71200867200153 | 4.98697335680309  |
| C  | 4.29659555944921  | -12.80129193206576 | 4.81076425899670  |
| O  | 3.71480261787835  | -13.36335787032489 | 3.88717297953563  |
| O  | 5.49227387632309  | -13.14023163279839 | 5.23561563415638  |
| Ni | 8.00500607518322  | -14.41686525815298 | 1.58528896369324  |
| Ni | 4.51465573351575  | -14.07335590359466 | 1.91454784676631  |
| O  | 6.36839375624759  | -14.14412684885641 | 2.75021360351680  |
| H  | 5.84306016920532  | -13.91398115714088 | 4.71234237375416  |
| C  | 6.36711439116431  | -15.52648211203021 | 3.00441065419402  |
| O  | 7.20889642465278  | -16.15208287563457 | 2.18917429959891  |
| O  | 8.04814835374461  | -15.30959906696774 | 4.63236165501965  |
| H  | 8.02174482389923  | -14.58396648714714 | 5.27153660872097  |
| N  | 6.67523764716637  | -15.65989736183678 | 4.46079845687388  |
| N  | 4.95437616985398  | -15.97243757508686 | 2.82441801509328  |
| H  | 6.63824754152622  | -16.65460884922233 | 4.70162436272660  |
| H  | 4.94015772693509  | -16.81789610774073 | 2.25582993026460  |
| H  | 4.45396415394647  | -16.12433847874851 | 3.70104424295961  |
| H  | 2.60976115385688  | -11.69373555636364 | 5.53164654262203  |
| H  | 3.94057171964399  | -8.84332693321361  | 1.24341979888987  |
| H  | -0.77716088202231 | -14.25577019989501 | 1.49176044170209  |
| H  | 8.21311192816754  | -16.48684480298572 | -1.75938339348026 |
| H  | 10.44540711999273 | -14.23211628397189 | -0.79988136116954 |
| H  | 8.78230034093664  | -9.68617224055489  | 3.66979738968453  |

**<sup>2</sup>Int3**

|   |                  |                    |                   |
|---|------------------|--------------------|-------------------|
| N | 5.44711944281966 | -10.21887628212492 | 0.11745634047360  |
| H | 5.97937839489954 | -9.66060547813080  | -0.53920220990111 |
| C | 4.37421604040116 | -9.78523873593477  | 0.87200465619791  |
| C | 5.67074121808494 | -11.52612405392391 | 0.40173202912975  |
| H | 6.47090897655618 | -12.13397716891739 | -0.02259913836335 |
| N | 4.79288480686913 | -11.94389913319017 | 1.29888919079755  |
| C | 3.97940243282352 | -10.87678682398747 | 1.60631444480573  |



---

|    |                   |                    |                   |
|----|-------------------|--------------------|-------------------|
| H  | 3.18210875753201  | -10.97023820023039 | 2.33773253813764  |
| N  | 0.99952170137229  | -14.80226839420712 | 0.30714326508892  |
| H  | 0.47350691424851  | -15.19642041305691 | -0.46413458342823 |
| C  | 0.46698496353008  | -14.21907892611391 | 1.43863252389686  |
| C  | 2.35101623104023  | -14.75794626386772 | 0.40285406751015  |
| H  | 3.05080351675919  | -15.13621999117265 | -0.33697806769343 |
| N  | 2.70768219883609  | -14.17887786210649 | 1.53588420961493  |
| C  | 1.54732674106148  | -13.83502265002689 | 2.19498824411172  |
| H  | 1.57291146453196  | -13.33516039094343 | 3.15754881444262  |
| C  | 7.34977248754001  | -15.32600578557003 | -2.58752606311761 |
| H  | 7.86364187965501  | -14.35636482762020 | -2.65046523858467 |
| H  | 7.00551536007744  | -15.60380543079762 | -3.59386739163149 |
| N  | 6.20903921899569  | -15.22909085984547 | -1.70350803209827 |
| H  | 5.37669412510389  | -15.76463962726442 | -1.91235957087355 |
| C  | 6.27277082806235  | -14.68315089341884 | -0.45151341833368 |
| O  | 5.24704381140796  | -14.78315152670477 | 0.28204297840756  |
| O  | 7.36319752436245  | -14.09087003921921 | -0.14445670158172 |
| N  | 9.72977295588525  | -15.50278260740907 | 0.92954345042411  |
| C  | 10.45273414498381 | -15.38391475885907 | -0.23609858854869 |
| C  | 10.09814356348305 | -16.63253694747775 | 1.50918357987479  |
| H  | 9.67024065023731  | -17.02007220436463 | 2.43218913059283  |
| N  | 11.04619089558441 | -17.24477432182305 | 0.75994376449116  |
| H  | 11.49302936752366 | -18.12789273607451 | 0.97985651616731  |
| C  | 11.28805906058597 | -16.46859552123703 | -0.35617719554300 |
| H  | 12.00798620927454 | -16.75254295334438 | -1.11844798428923 |
| N  | 10.59037323728547 | -10.96319456459963 | 1.96946797887069  |
| H  | 11.47529083523495 | -10.47239897539341 | 1.90709075189270  |
| C  | 9.40696906750741  | -10.44597119933896 | 2.45622360601161  |
| C  | 10.37378753271078 | -12.25302327949994 | 1.61333355432421  |
| H  | 11.13921950661667 | -12.91023097745067 | 1.20631046820870  |
| N  | 9.11477770549089  | -12.58119307532758 | 1.84357184752288  |
| C  | 8.49376011059953  | -11.46855409877381 | 2.37199846469171  |
| H  | 7.44606281399365  | -11.49755446329287 | 2.66020393838702  |
| C  | 2.65769694347535  | -12.55091651683127 | 5.88489410491141  |
| H  | 1.85071748458273  | -13.27765993463505 | 6.07460995197566  |
| H  | 3.02920049582722  | -12.21878015361038 | 6.86432746423663  |
| C  | 3.75737292812201  | -13.24076830054509 | 5.11193101256382  |
| O  | 3.90623789388463  | -13.01011743614868 | 3.90288717543122  |
| O  | 4.45426970747919  | -14.07180283089833 | 5.81235645443153  |
| Ni | 8.17417704617081  | -14.39718891755097 | 1.66961541909634  |
| Ni | 4.69156976972262  | -13.84441985504834 | 2.09215899956812  |
| O  | 6.59506850915794  | -13.86097672945409 | 2.84680721396630  |
| H  | 5.36241406479496  | -14.50288715858285 | 5.35646955022169  |

|   |                   |                    |                   |
|---|-------------------|--------------------|-------------------|
| C | 6.55366592003738  | -15.16509078422426 | 3.34494681014356  |
| O | 7.53752344223694  | -15.89214979856739 | 2.82863767288492  |
| O | 7.59702265562051  | -14.05607322012514 | 5.17236487816068  |
| H | 7.43140745867835  | -13.40779761223808 | 4.45194928994677  |
| N | 6.59898114546445  | -15.01305837238206 | 4.84952687244205  |
| N | 5.19265031731499  | -15.69809613738541 | 3.04221425059357  |
| H | 6.95273431824446  | -15.89045272146323 | 5.24071788895744  |
| H | 5.29190293963831  | -16.46160382302834 | 2.37415377448226  |
| H | 4.68649875626668  | -16.02895435582213 | 3.86351168941095  |
| H | 2.25502585247031  | -11.70353928492201 | 5.31660375165709  |
| H | 3.99770075100575  | -8.76769762188792  | 0.82090601980439  |
| H | -0.60333622806301 | -14.13165444833974 | 1.60172051524630  |
| H | 8.08865101762327  | -16.07569771233682 | -2.25081925871406 |
| H | 10.30259613494672 | -14.54725771099362 | -0.91337477200342 |
| H | 9.32417388172820  | -9.42577476033433  | 2.81987810049780  |

**<sup>2</sup>TS4 (107i cm<sup>-1</sup>)**

|   |                  |                    |                   |
|---|------------------|--------------------|-------------------|
| N | 5.51153789642109 | -10.25773609250284 | 0.46088976598979  |
| H | 6.09548908624321 | -9.65078623564785  | -0.10164925948059 |
| C | 4.42063516417643 | -9.86656682482862  | 1.21364505110178  |
| C | 5.66792196286731 | -11.59836064117102 | 0.59581252595434  |
| H | 6.45459029736234 | -12.19611814843953 | 0.13268957481220  |
| N | 4.73139669614339 | -12.07556664291566 | 1.39734714831291  |
| C | 3.94474254487939 | -11.01779408483026 | 1.79270157032434  |
| H | 3.09956202739439 | -11.16264115040924 | 2.45953191622999  |
| N | 0.82883332488134 | -14.49362001340559 | 0.07444307193906  |
| H | 0.27283790759881 | -14.67562844743714 | -0.75288060399062 |
| C | 0.34098755007668 | -14.18372748105085 | 1.32910876206939  |
| C | 2.18259617340392 | -14.51534972289583 | 0.13852485226208  |
| H | 2.85081758156953 | -14.73102834015326 | -0.69115337015863 |
| N | 2.57905078120857 | -14.23625622990501 | 1.36730058317657  |
| C | 1.44849740390376 | -14.02421127362985 | 2.12571089302391  |
| H | 1.53377190385068 | -13.77081588751582 | 3.17839861412276  |
| C | 7.55272287113699 | -15.81806750141192 | -2.31916135717988 |
| H | 8.10727667022811 | -14.87917971455227 | -2.45362184619360 |
| H | 7.33751760159992 | -16.24285755595194 | -3.30995294217620 |
| N | 6.30919008177919 | -15.56494750521883 | -1.62618839015156 |
| H | 5.49771492048930 | -16.12977764467415 | -1.84228556591349 |
| C | 6.22401138891438 | -14.81936530350172 | -0.48464826930165 |
| O | 5.11095059250721 | -14.79029255894815 | 0.10987562122183  |
| O | 7.28248891472641 | -14.18141501497646 | -0.13982446808594 |

---

|    |                   |                    |                   |
|----|-------------------|--------------------|-------------------|
| N  | 9.75900095857676  | -15.41000036886294 | 0.93315410844636  |
| C  | 10.55663574106078 | -15.09274275153903 | -0.14317793123788 |
| C  | 10.13762963009407 | -16.60103128603561 | 1.36552926179975  |
| H  | 9.66537511333380  | -17.14500758869843 | 2.18108136106936  |
| N  | 11.16417565154423 | -17.05904276214617 | 0.61056039426818  |
| H  | 11.63608635062070 | -17.94815129379898 | 0.73255881645710  |
| C  | 11.44789470871893 | -16.11604415472458 | -0.35659675707277 |
| H  | 12.23210640753934 | -16.25630365061239 | -1.09500514551171 |
| N  | 9.97734621853148  | -10.77325219139544 | 2.33692424851014  |
| H  | 10.74336967169689 | -10.11288280059607 | 2.26744361269113  |
| C  | 8.81523207572566  | -10.59861655408061 | 3.06341569833443  |
| C  | 9.93471089207885  | -11.99823526908764 | 1.76009482728155  |
| H  | 10.73087093256712 | -12.40505381992712 | 1.14066209382662  |
| N  | 8.80507472470458  | -12.60813222206870 | 2.07602331493657  |
| C  | 8.09176827740844  | -11.75234685707570 | 2.89300705213358  |
| H  | 7.12937053602683  | -12.04400921539688 | 3.30529313878192  |
| C  | 3.55200411978098  | -11.77388091170812 | 5.46968408772337  |
| H  | 3.85362528156180  | -11.61451533204678 | 6.51319036018405  |
| H  | 3.75623003130039  | -10.84397978771685 | 4.91242885990422  |
| C  | 4.36608380558582  | -12.89491204077178 | 4.83573253963307  |
| O  | 3.81951777791202  | -13.50595105869768 | 3.86027768716509  |
| O  | 5.50183296054558  | -13.12214781825765 | 5.30919550079758  |
| Ni | 8.09588082397567  | -14.48548171103865 | 1.65684013853838  |
| Ni | 4.53737399358188  | -14.03761745461335 | 1.96493079416488  |
| O  | 6.41574612714350  | -14.22088965229412 | 2.73184361266576  |
| H  | 5.93948454509528  | -15.33571438839457 | 5.35230960724787  |
| C  | 6.37819553918322  | -15.52419651344311 | 3.02560608292681  |
| O  | 7.29597068943408  | -16.23892701264813 | 2.46216440979193  |
| O  | 7.67207653915789  | -14.47585101662481 | 5.03606354866018  |
| H  | 7.02917930967381  | -13.70838100643462 | 5.04971549850445  |
| N  | 6.77629572514734  | -15.50030003070472 | 4.77490109342269  |
| N  | 5.02269052262722  | -16.02260590482154 | 2.98450297602656  |
| H  | 7.22930823004648  | -16.38417295911022 | 5.02232065388187  |
| H  | 4.96884349393364  | -16.99795509098729 | 2.70338458910084  |
| H  | 4.44051911908636  | -15.79862294509132 | 3.79004225347284  |
| H  | 2.47370064723335  | -11.97518744067918 | 5.40366151796849  |
| H  | 4.08653005737254  | -8.83428746669365  | 1.26466859347140  |
| H  | -0.72225140499831 | -14.10722393822349 | 1.53766045807534  |
| H  | 8.21051652140842  | -16.51886672535064 | -1.77313675172761 |
| H  | 10.41353924133720 | -14.17475736466154 | -0.70706140900875 |
| H  | 8.61532410928248  | -9.69684223696465  | 3.63492161478541  |

---

|   |                   |                    |                   |
|---|-------------------|--------------------|-------------------|
| N | 6.23482040157319  | -10.38182854142030 | -0.51841087799541 |
| H | 6.61112006457947  | -9.89893032276383  | -1.32583942514462 |
| C | 6.04601187715147  | -9.84133754756939  | 0.74148635919745  |
| C | 5.78345326421189  | -11.66025680565502 | -0.50574347956754 |
| H | 5.83479552442965  | -12.35306063205766 | -1.34239829174981 |
| N | 5.32477646904051  | -11.95709502996490 | 0.69783327857874  |
| C | 5.47547040916001  | -10.84116679540332 | 1.49056660397757  |
| H | 5.15957059520453  | -10.86099164687796 | 2.52972467976132  |
| N | 0.64915520418965  | -13.21028177424546 | -0.28569601768692 |
| H | -0.03418077829988 | -13.35508574736050 | -1.02014428882153 |
| C | 0.44666616892403  | -12.50318610808483 | 0.88400211740597  |
| C | 1.91384055336190  | -13.69219708578136 | -0.28032520366345 |
| H | 2.36870647292942  | -14.28657899918100 | -1.06909018970083 |
| N | 2.52512388391692  | -13.32777432048168 | 0.83485197247062  |
| C | 1.63023568082826  | -12.58567789050304 | 1.57417243323330  |
| H | 1.91276915009660  | -12.17558344485628 | 2.53950538587652  |
| C | 7.06173405028799  | -17.19592121252026 | -1.52429959319527 |
| H | 7.54687197808960  | -16.73912360735772 | -2.40010606560353 |
| H | 6.83900383175550  | -18.24482536171044 | -1.76168199785812 |
| N | 5.82275997303784  | -16.51449943698508 | -1.20362671530229 |
| H | 4.98817689243349  | -17.05472565556268 | -1.01184235640492 |
| C | 5.75034327474207  | -15.19266244645163 | -0.91241550054195 |
| O | 4.63680960911499  | -14.71979606485030 | -0.53140398378472 |
| O | 6.83033313265242  | -14.50472319808541 | -1.04328370430814 |
| N | 9.65966810120973  | -14.14650517850883 | -0.48354018365985 |
| C | 9.74671448364093  | -14.29252539071705 | -1.85187435556136 |
| C | 10.88739091682137 | -14.24183952003870 | 0.00243468437899  |
| H | 11.16054976088477 | -14.19148067677441 | 1.05437917031149  |
| N | 11.76681430159821 | -14.43696977179500 | -1.00725351030210 |
| H | 12.76835862925184 | -14.55832863212352 | -0.90342045138797 |
| C | 11.06378109940142 | -14.47258053686854 | -2.19506621462689 |
| H | 11.55017415379512 | -14.62493339303311 | -3.15424299748260 |
| N | 9.06714142152222  | -10.75949711208550 | 2.74346961264183  |
| H | 9.48966443651544  | -9.84014623922411  | 2.80185387147465  |
| C | 8.34013246965461  | -11.38513319918842 | 3.73733150807105  |
| C | 9.11982877588990  | -11.58799543550778 | 1.67517983902118  |
| H | 9.62903768642523  | -11.35219156948635 | 0.74336060487492  |
| N | 8.46491085278761  | -12.70919795129069 | 1.94000183001392  |
| C | 7.96366072326251  | -12.60138572742429 | 3.22415366165172  |
| H | 7.37478821644781  | -13.39444962635782 | 3.68902728009313  |
| C | 3.95956554311657  | -13.34918478495732 | 5.52232272567645  |
| H | 2.90224689070344  | -13.45380430536215 | 5.81584870164040  |
| H | 4.55059244950408  | -13.97637980957589 | 6.20373509907671  |

|    |                   |                    |                   |
|----|-------------------|--------------------|-------------------|
| C  | 4.11667699237046  | -13.84675373128228 | 4.09884650268530  |
| O  | 4.20530996166297  | -12.96837199969990 | 3.18176373743360  |
| O  | 4.12265680064780  | -15.08168539088108 | 3.88227716575138  |
| Ni | 7.93713849784793  | -14.14910587492384 | 0.59067449182080  |
| Ni | 4.47019246882519  | -13.72306193346936 | 1.31586878409367  |
| O  | 6.28379760910640  | -14.58319858065395 | 1.75741344367647  |
| H  | 7.78659780813071  | -15.77235688654329 | 4.82240898326060  |
| C  | 6.77365284671038  | -15.76168302863268 | 1.99947796456535  |
| O  | 7.96509358602073  | -15.96624115155407 | 1.61272793795852  |
| N  | 7.04440404784800  | -15.16714086105664 | 5.18827470953325  |
| N  | 6.00305372074623  | -16.68677625210553 | 2.58194182891681  |
| H  | 7.43165883588865  | -14.77582952465970 | 6.05185724141216  |
| O  | 6.01067295194673  | -16.04730043742873 | 5.61559785055530  |
| H  | 5.23689061354052  | -15.76824134266151 | 5.07606321259854  |
| H  | 6.43878516647148  | -17.53433869752032 | 2.92236865176966  |
| H  | 5.16076551739537  | -16.32677628947415 | 3.04466579714542  |
| H  | 4.24875353275944  | -12.29451046630750 | 5.61439957930928  |
| H  | 6.31120668370416  | -8.81523538474798  | 0.97935739081175  |
| H  | -0.49779943057032 | -12.01958886949709 | 1.11594858731362  |
| H  | 7.76892613053567  | -17.16296849099696 | -0.67874102077528 |
| H  | 8.85183800426187  | -14.27878742088242 | -2.46762686439917 |
| H  | 8.15424690830299  | -10.92040864896629 | 4.70124439948442  |

The Cartesian coordinates for stationary points concerning the HU inhibition (**2'**) process optimized at the GFN2-xTB level

## **<sup>2</sup>R**

|   |                  |                    |                   |
|---|------------------|--------------------|-------------------|
| N | 4.53118428612032 | -10.28020819558765 | 0.43971660001814  |
| H | 4.96773299058347 | -9.47184860363867  | 0.02633690508117  |
| C | 3.26390006284882 | -10.33301935006809 | 0.93952989631800  |
| C | 5.09308703968109 | -11.48677913358769 | 0.63378091757939  |
| H | 6.09055897261313 | -11.74507601711819 | 0.33340942538249  |
| N | 4.24867712824018 | -12.30149668599146 | 1.22196259978131  |
| C | 3.10117898541769 | -11.59728837928058 | 1.42070838285110  |
| H | 2.24902389734510 | -12.03076459946459 | 1.90297663480613  |
| N | 1.24208601649211 | -15.50095066322628 | 0.26600765246802  |
| H | 0.71178956195205 | -15.75231329680032 | -0.55307294278405 |
| C | 0.74576191038308 | -15.37718265892515 | 1.53116462071834  |
| C | 2.55698162037025 | -15.21869428795743 | 0.31857702864621  |
| H | 3.21952846266861 | -15.23373507118387 | -0.52302454528852 |
| N | 2.92235070393726 | -14.92816776226445 | 1.54424563159109  |
| C | 1.80289626198112 | -15.02102446453360 | 2.31487350365609  |

---

|    |                   |                    |                   |
|----|-------------------|--------------------|-------------------|
| H  | 1.83719673421292  | -14.81954507916376 | 3.36620856926538  |
| C  | 7.98650146879336  | -15.26079627491245 | -2.40808680006219 |
| H  | 8.13704324323577  | -16.31918795161543 | -2.63844070189245 |
| H  | 8.82839188448043  | -14.90237502484310 | -1.82069322010578 |
| N  | 6.79212362660241  | -15.05185314767166 | -1.62862164498936 |
| H  | 5.92139838598189  | -15.38124591104905 | -2.01390108840868 |
| C  | 6.79306666091055  | -14.78749323530668 | -0.27999158645204 |
| O  | 5.67226355349353  | -14.84116098022031 | 0.27505351747045  |
| O  | 7.91143472786895  | -14.48099832051716 | 0.22069414508059  |
| N  | 10.11431345654726 | -15.72214887319945 | 2.25263075384943  |
| C  | 10.82768805303409 | -16.23782272347958 | 1.21389747498777  |
| C  | 10.40931455626644 | -16.44822103167712 | 3.30702799194961  |
| H  | 10.00793383136005 | -16.29728650499992 | 4.29039664805843  |
| N  | 11.29339451323816 | -17.40956912440256 | 2.98909940914682  |
| H  | 11.67696276617777 | -18.10143925271763 | 3.61324229696537  |
| C  | 11.56948675412686 | -17.29153869539019 | 1.65879089707214  |
| H  | 12.24810315567852 | -17.94427823714650 | 1.15103964631763  |
| N  | 10.80256147967876 | -11.09789239389500 | 1.64359781413026  |
| H  | 11.29977977487237 | -10.44285083130829 | 1.06118530133904  |
| C  | 10.75769127975730 | -11.07871709244569 | 3.00649862196569  |
| C  | 10.07463533925028 | -12.15002533184341 | 1.22840147731223  |
| H  | 9.92275868093489  | -12.42118812137963 | 0.20254105124637  |
| N  | 9.57094394684793  | -12.79748746360660 | 2.25254912244713  |
| C  | 9.98677515121419  | -12.14192326013811 | 3.37313269714157  |
| H  | 9.70969079474017  | -12.47209833859716 | 4.35435928605376  |
| C  | 3.92140634248686  | -12.61254261395391 | 6.00715151809611  |
| H  | 4.80895971811569  | -12.71181851406156 | 6.62926393788716  |
| H  | 3.50660510462744  | -11.62010765650848 | 6.15426324291759  |
| C  | 4.33125254378965  | -12.77666822955370 | 4.54369128547140  |
| O  | 4.16852341180638  | -13.94729092698867 | 4.06437939692304  |
| O  | 4.80572570313401  | -11.83215149557943 | 3.92242909118528  |
| Ni | 8.41545933406064  | -14.52425868429226 | 2.18691906641542  |
| Ni | 4.81334428483414  | -14.10013029361612 | 2.05814678571135  |
| O  | 6.70616511469241  | -13.41146675292598 | 2.69211981964817  |
| H  | 6.69351882580949  | -12.45133606851133 | 2.72145792937719  |
| C  | 6.36686927715444  | -16.14805686829152 | 3.21819528101258  |
| O  | 7.33396319246126  | -16.31460789537761 | 2.47774932694188  |
| O  | 7.57277455405437  | -14.77206235314005 | 4.65973498505440  |
| H  | 7.29742370163227  | -13.95519881766202 | 4.11785508458553  |
| N  | 6.49091596971686  | -15.64492065146586 | 4.48700387633829  |
| N  | 5.10518523672798  | -16.51000139461173 | 2.85274670128943  |
| H  | 5.63716979243920  | -15.24443813557602 | 4.88051401875776  |
| H  | 5.01503441540266  | -17.05457723186921 | 2.00862387220888  |

|   |                   |                    |                   |
|---|-------------------|--------------------|-------------------|
| H | 4.36019487418604  | -16.53659910106370 | 3.53148558845162  |
| H | 3.19956408340126  | -13.37348576745308 | 6.28891302153581  |
| H | 2.60042634832448  | -9.49416577934645  | 0.91902268675986  |
| H | -0.28386160193089 | -15.54815211763236 | 1.76556878977303  |
| H | 7.92814094010854  | -14.69941789004208 | -3.34224772689736 |
| H | 10.75558927923474 | -15.82271501658738 | 0.22945226816426  |
| H | 11.25842684379092 | -10.33525927273512 | 3.59021976167721  |

**<sup>2</sup>TS1** (278i cm<sup>-1</sup>)

|   |           |            |           |
|---|-----------|------------|-----------|
| N | 5.084281  | -10.246842 | 0.021235  |
| H | 5.581580  | -9.681751  | -0.650364 |
| C | 4.035524  | -9.835042  | 0.799364  |
| C | 5.326075  | -11.542829 | 0.304874  |
| H | 6.117008  | -12.135825 | -0.127120 |
| N | 4.485927  | -11.970046 | 1.222420  |
| C | 3.673904  | -10.921029 | 1.544163  |
| H | 2.903127  | -11.022042 | 2.286067  |
| N | 0.749969  | -14.845543 | 0.188752  |
| H | 0.206711  | -15.157461 | -0.602178 |
| C | 0.249147  | -14.423222 | 1.390755  |
| C | 2.093743  | -14.764807 | 0.254353  |
| H | 2.767841  | -15.027395 | -0.541069 |
| N | 2.471236  | -14.316851 | 1.430852  |
| C | 1.333702  | -14.097365 | 2.153481  |
| H | 1.386876  | -13.718639 | 3.157307  |
| C | 7.690772  | -15.954378 | -1.995715 |
| H | 8.336299  | -15.093806 | -1.818928 |
| H | 7.562872  | -16.098008 | -3.071651 |
| N | 6.419607  | -15.690846 | -1.373767 |
| H | 5.648733  | -16.309350 | -1.574138 |
| C | 6.239625  | -14.810897 | -0.339109 |
| O | 5.084097  | -14.778199 | 0.153727  |
| O | 7.224490  | -14.064816 | -0.040685 |
| N | 9.769069  | -15.398844 | 1.008130  |
| C | 10.738323 | -15.003536 | 0.129424  |
| C | 9.859597  | -16.708698 | 1.102297  |
| H | 9.206557  | -17.328290 | 1.691785  |
| N | 10.855254 | -17.171943 | 0.321967  |
| H | 11.130316 | -18.137105 | 0.214410  |
| C | 11.426416 | -16.100249 | -0.305991 |
| H | 12.247975 | -16.201702 | -0.989629 |
| N | 10.438162 | -10.968841 | 2.760863  |
| H | 11.293394 | -10.502590 | 3.025119  |

|    |           |            |           |
|----|-----------|------------|-----------|
| C  | 9.187475  | -10.416673 | 2.767677  |
| C  | 10.317937 | -12.249161 | 2.358898  |
| H  | 11.148072 | -12.927757 | 2.272491  |
| N  | 9.059893  | -12.539388 | 2.106435  |
| C  | 8.339087  | -11.404833 | 2.357660  |
| H  | 7.269541  | -11.389524 | 2.244433  |
| C  | 3.446941  | -12.419126 | 6.040467  |
| H  | 2.589971  | -13.067688 | 6.224110  |
| H  | 4.052038  | -12.331516 | 6.940776  |
| C  | 4.285275  | -12.987261 | 4.897685  |
| O  | 3.658724  | -13.214997 | 3.825930  |
| O  | 5.496834  | -13.192279 | 5.090941  |
| Ni | 8.134836  | -14.348754 | 1.749973  |
| Ni | 4.443757  | -13.899634 | 1.981549  |
| O  | 6.396427  | -13.798024 | 2.688021  |
| H  | 6.311732  | -13.359263 | 3.564275  |
| C  | 6.395271  | -15.677289 | 3.093297  |
| O  | 7.083706  | -16.127527 | 2.149788  |
| N  | 6.992333  | -15.569095 | 4.369896  |
| N  | 5.002097  | -15.883346 | 3.095055  |
| H  | 6.518949  | -14.871086 | 4.957871  |
| H  | 4.735957  | -16.652530 | 2.490341  |
| H  | 4.561984  | -15.907000 | 4.007829  |
| O  | 8.328029  | -15.093681 | 4.198281  |
| H  | 8.890111  | -15.871020 | 4.327258  |
| H  | 3.070912  | -11.436848 | 5.752025  |
| H  | 3.644848  | -8.835671  | 0.760858  |
| H  | -0.803956 | -14.391757 | 1.597135  |
| H  | 8.173133  | -16.846273 | -1.574164 |
| H  | 10.863205 | -13.972203 | -0.145842 |
| H  | 9.007468  | -9.399671  | 3.060683  |

**<sup>2</sup>Int1**

|   |                  |                    |                   |
|---|------------------|--------------------|-------------------|
| N | 5.07780873431333 | -10.26691715836452 | -0.07942639832375 |
| H | 5.69223509612604 | -9.68957473565877  | -0.63094543816606 |
| C | 3.83689927902632 | -9.91656375192233  | 0.36850529080424  |
| C | 5.32353052766572 | -11.52252938198350 | 0.33595981965686  |
| H | 6.22368661139358 | -12.07538894614826 | 0.12803355863527  |
| N | 4.30225138143093 | -11.98437010501496 | 1.02251944360178  |
| C | 3.36546017829003 | -10.99649724759905 | 1.05373833235228  |
| H | 2.43491716607276 | -11.12552930400034 | 1.56796119577232  |
| N | 0.69304555761207 | -15.29470625436858 | 0.43725871173626  |
| H | 0.14352307406742 | -15.73618552460134 | -0.28288057246216 |



---

|    |                   |                    |                   |
|----|-------------------|--------------------|-------------------|
| C  | 0.22225196852184  | -14.83801166316809 | 1.63406822251623  |
| C  | 2.01381872357432  | -15.04476561555303 | 0.39853184448960  |
| H  | 2.66201263758554  | -15.28755235814861 | -0.41965628222205 |
| N  | 2.40494549839300  | -14.45741845075394 | 1.50551639851326  |
| C  | 1.29933468130403  | -14.31905318549202 | 2.28869320161282  |
| H  | 1.36134811071555  | -13.85692212136727 | 3.25259319812217  |
| C  | 7.63566406127318  | -15.80989876495392 | -2.08268243012613 |
| H  | 8.38087124054631  | -15.15252646895146 | -1.63814146739591 |
| H  | 7.49735881107827  | -15.53772263173833 | -3.13246600218667 |
| N  | 6.41599073864632  | -15.64171665398237 | -1.34110643478913 |
| H  | 5.61415975900786  | -16.19176143512418 | -1.60335912040138 |
| C  | 6.23894963269053  | -14.74176496783612 | -0.32357369173456 |
| O  | 5.07322880537151  | -14.68897933665203 | 0.13861314807172  |
| O  | 7.22535659132953  | -14.00238070530102 | -0.02669275410088 |
| N  | 9.81264198966115  | -15.36462390688776 | 0.89910268234380  |
| C  | 10.89309738403398 | -15.00563947464691 | 0.14906509639946  |
| C  | 9.66030441178133  | -16.66205661430524 | 0.73931110253522  |
| H  | 8.87631304509940  | -17.23915779265298 | 1.19173446715321  |
| N  | 10.60665223183220 | -17.15201222233886 | -0.07988906071838 |
| H  | 10.71634956580759 | -18.11346382150417 | -0.36121492764619 |
| C  | 11.39969497854113 | -16.11211401792887 | -0.46559487738747 |
| H  | 12.23434407101628 | -16.23508808084360 | -1.12329871171343 |
| N  | 10.44968962862040 | -11.05726541730963 | 3.30811376368955  |
| H  | 11.25550244083110 | -10.67765928928382 | 3.77911350984729  |
| C  | 9.23028764754815  | -10.45836888703384 | 3.20162123788053  |
| C  | 10.36923009951923 | -12.25037610683787 | 2.69292696452152  |
| H  | 11.18685856272183 | -12.94053497681032 | 2.62535260096238  |
| N  | 9.16812297774148  | -12.44231993045217 | 2.19641542218636  |
| C  | 8.44279454346063  | -11.32854965673197 | 2.50851760645604  |
| H  | 7.41355371194145  | -11.23148266048990 | 2.22535584121441  |
| C  | 3.62941100206557  | -11.76244130349184 | 5.79118915907872  |
| H  | 3.66944509988686  | -10.68916516519103 | 5.61752560121061  |
| H  | 2.59249677869180  | -12.08246038591764 | 5.81188708115189  |
| C  | 4.37408005115725  | -12.45545953575060 | 4.65809845697526  |
| O  | 3.67784100947367  | -12.91683730545911 | 3.72663440907227  |
| O  | 5.62211449909882  | -12.51432920630121 | 4.73344358940866  |
| Ni | 8.26672968671878  | -14.26843649442715 | 1.71540891633034  |
| Ni | 4.31768054010866  | -13.85120995652615 | 1.92630165050215  |
| O  | 6.39467723759539  | -13.73898661945536 | 2.66515824067335  |
| H  | 6.17696663029242  | -13.16240690704607 | 3.52336213415071  |
| C  | 6.42706863591930  | -15.14346493067117 | 3.06297443860690  |
| O  | 7.07565992766659  | -15.85503134470578 | 2.17234734846101  |
| O  | 8.50091290745295  | -14.88764581392018 | 4.09235168736025  |

|   |                   |                    |                   |
|---|-------------------|--------------------|-------------------|
| H | 8.93737663389904  | -15.75094247076946 | 4.03496104945474  |
| N | 7.12637369627339  | -15.20711506817548 | 4.36861665961233  |
| N | 5.02790050676439  | -15.56517514680533 | 3.20885436063500  |
| H | 6.80374046503512  | -14.45140704086789 | 4.97691240609390  |
| H | 4.92056345235085  | -16.48005795152433 | 2.78039140340552  |
| H | 4.73676757203166  | -15.60409808672251 | 4.18152591361146  |
| H | 4.11810482851330  | -11.97732962777254 | 6.73719307297459  |
| H | 3.40248576815766  | -8.95869768501321  | 0.17267470474954  |
| H | -0.80664611051206 | -14.91751662221463 | 1.91609419582782  |
| H | 7.97930165464586  | -16.84586589959710 | -2.02942145672867 |
| H | 11.22755305288618 | -13.98980534806348 | 0.09322939127505  |
| H | 9.02231016763238  | -9.49507037886712  | 3.61735962440593  |

**<sup>2</sup>TS2 (624i cm<sup>-1</sup>)**

|   |                   |                    |                   |
|---|-------------------|--------------------|-------------------|
| N | 5.10756899405310  | -10.27870664520196 | -0.06988599066265 |
| H | 5.72933596085798  | -9.70784231657437  | -0.62016818711187 |
| C | 3.86681649718793  | -9.91753594848803  | 0.37035645889979  |
| C | 5.34132452175148  | -11.53529154989372 | 0.34909007750153  |
| H | 6.23849787440420  | -12.09675597797231 | 0.14982786076044  |
| N | 4.31304272472515  | -11.98758741424714 | 1.03166619710822  |
| C | 3.38360144290198  | -10.99244164557051 | 1.05535487256292  |
| H | 2.44813165849351  | -11.11267262303525 | 1.56292824398294  |
| N | 0.68490464642030  | -15.26218821722134 | 0.41165427636316  |
| H | 0.13043035419772  | -15.66967489128274 | -0.32449567444866 |
| C | 0.22912063916226  | -14.89277322083566 | 1.64370099845030  |
| C | 1.99949336573382  | -14.98251903894822 | 0.36477806244490  |
| H | 2.63582270125638  | -15.16028944820281 | -0.47898021343650 |
| N | 2.40137752934293  | -14.45875877302847 | 1.49930544488207  |
| C | 1.30886172910012  | -14.39421128504501 | 2.30984146320458  |
| H | 1.37791834179775  | -13.99185288260112 | 3.29961083355910  |
| C | 7.61596183740052  | -15.88656909726286 | -2.04476302490011 |
| H | 8.35884227886555  | -15.20723077267808 | -1.63044642073162 |
| H | 7.48437342922958  | -15.66901753790364 | -3.10810640811381 |
| N | 6.39131837707553  | -15.67856797029441 | -1.32219081592591 |
| H | 5.59477576563690  | -16.25057362845274 | -1.55121774766399 |
| C | 6.22029738534328  | -14.75520245779898 | -0.32577972745009 |
| O | 5.05135239101710  | -14.68735106549157 | 0.13210233017550  |
| O | 7.20501808532463  | -14.00890905795119 | -0.04869484666035 |
| N | 9.80983115002856  | -15.33137302743367 | 0.90419841334609  |
| C | 10.87539550447284 | -14.94723591976284 | 0.14576695535493  |
| C | 9.68185251149434  | -16.63023149830238 | 0.73749296996032  |
| H | 8.91286043927411  | -17.22542373677254 | 1.19195946149574  |
| N | 10.62898313316701 | -17.09711081198319 | -0.09455687437594 |

|    |                   |                    |                   |
|----|-------------------|--------------------|-------------------|
| H  | 10.75340986127822 | -18.05409172923005 | -0.38539777764706 |
| C  | 11.39762798469043 | -16.03932604737718 | -0.48155663878991 |
| H  | 12.22757629463978 | -16.14200196790493 | -1.14826535909949 |
| N  | 10.40153980280695 | -11.06579489722906 | 3.36109866786849  |
| H  | 11.20400955749835 | -10.69317998036274 | 3.84322214553296  |
| C  | 9.18005324966406  | -10.46941077937162 | 3.26132170909784  |
| C  | 10.32791945813033 | -12.24614080221044 | 2.72027534783190  |
| H  | 11.14840087962898 | -12.93172115402874 | 2.64246095149604  |
| N  | 9.13030021401083  | -12.43175296104890 | 2.21370513350151  |
| C  | 8.39951280863050  | -11.32760479167696 | 2.54560487148041  |
| H  | 7.37064680212626  | -11.23219012665741 | 2.26097072459543  |
| C  | 3.71428775879906  | -11.66905995228487 | 5.76274368331159  |
| H  | 3.84109688220187  | -10.60080178077219 | 5.59787060368692  |
| H  | 2.65535044783672  | -11.90459452160447 | 5.78924498656645  |
| C  | 4.39009961514200  | -12.41174493391545 | 4.62745446714506  |
| O  | 3.68378458686801  | -12.91119638061847 | 3.74004284975957  |
| O  | 5.65772152106601  | -12.46794274508873 | 4.67049272677582  |
| Ni | 8.23401353926569  | -14.25805615382649 | 1.70789271079160  |
| Ni | 4.3233633287578   | -13.86546959622796 | 1.91995737072181  |
| O  | 6.37981564436741  | -13.76544005472956 | 2.67892224975206  |
| H  | 6.10106063821456  | -13.09539536046530 | 3.65339358948636  |
| C  | 6.41338749956302  | -15.14789538091835 | 3.03895876368040  |
| O  | 7.06105654017779  | -15.86083426764496 | 2.14040507489234  |
| O  | 8.49683551399208  | -14.94376895035811 | 4.06822227525342  |
| H  | 8.91256924621711  | -15.81095595145395 | 3.94631156786170  |
| N  | 7.12129779632779  | -15.25569632932948 | 4.34647391841628  |
| N  | 5.01335532616274  | -15.58908994020251 | 3.18651498059271  |
| H  | 6.81723202173268  | -14.50943426416687 | 4.97349494025807  |
| H  | 4.92011411885092  | -16.49647479696182 | 2.73833172987212  |
| H  | 4.73584477266024  | -15.66057350492389 | 4.16154113526539  |
| H  | 4.18860144611991  | -11.92535653621800 | 6.70575607103692  |
| H  | 3.44037121801631  | -8.95720247668193  | 0.16900961751171  |
| H  | -0.79229148343077 | -15.01133612664712 | 1.93911344164405  |
| H  | 7.95952899762327  | -16.91824940002808 | -1.93553771999707 |
| H  | 11.18982681834366 | -13.92475960660454 | 0.09380461142608  |
| H  | 8.96750285818492  | -9.51524390099201  | 3.69542272984944  |

## <sup>2</sup>Int2

|   |                  |                    |                   |
|---|------------------|--------------------|-------------------|
| N | 5.11783861141828 | -10.32222664147817 | -0.11110857521913 |
| H | 5.72739894425128 | -9.77086848654847  | -0.69370332037375 |
| C | 3.88061746706416 | -9.95227460722281  | 0.33134283521559  |
| C | 5.36530886648732 | -11.56071971731385 | 0.35189698573153  |
| H | 6.26233485782478 | -12.12594939047111 | 0.16170178921312  |

---

|    |                   |                    |                   |
|----|-------------------|--------------------|-------------------|
| N  | 4.34998733940861  | -11.99338895778782 | 1.06579715824323  |
| C  | 3.41415189685868  | -11.00336170897675 | 1.06334067564099  |
| H  | 2.48441454278854  | -11.11025005328765 | 1.58440987282052  |
| N  | 0.68750895859248  | -15.24337712131626 | 0.43654585790896  |
| H  | 0.12813163512425  | -15.63509594334490 | -0.30433998581870 |
| C  | 0.24073203254813  | -14.90133203700645 | 1.67967598933888  |
| C  | 2.00188278765008  | -14.96166215966478 | 0.38687084324102  |
| H  | 2.63213711434390  | -15.12117759461450 | -0.46510332883566 |
| N  | 2.41264316585741  | -14.46230501832218 | 1.52872463666235  |
| C  | 1.32554438457715  | -14.41668392872653 | 2.34789567507206  |
| H  | 1.39973236235668  | -14.03850777678303 | 3.34664239701212  |
| C  | 7.58128949141028  | -15.92592581296564 | -2.05701259407222 |
| H  | 8.33352010163990  | -15.25424402915565 | -1.64707739906226 |
| H  | 7.44708007027452  | -15.70828882707567 | -3.12005523851139 |
| N  | 6.36304882379300  | -15.70278210959804 | -1.32800991859414 |
| H  | 5.56248550393776  | -16.27528032842388 | -1.54070530485057 |
| C  | 6.20894301168033  | -14.76921177991568 | -0.33886141132267 |
| O  | 5.04232798140286  | -14.68942881667163 | 0.12805599129101  |
| O  | 7.19889451136060  | -14.02706930361335 | -0.07848241855333 |
| N  | 9.81468693676327  | -15.30217773022177 | 0.91267077549783  |
| C  | 10.88726691035410 | -14.89147804238447 | 0.17873305744598  |
| C  | 9.69693504489623  | -16.59588095498248 | 0.70771108424292  |
| H  | 8.92609596757661  | -17.20818727889327 | 1.13550361513256  |
| N  | 10.65738854666073 | -17.03493895649260 | -0.12531594681414 |
| H  | 10.79084886082112 | -17.98249482334764 | -0.44069939197961 |
| C  | 11.42435742943633 | -15.96207061405708 | -0.47245470482244 |
| H  | 12.26339456836389 | -16.04141879581698 | -1.13127004068820 |
| N  | 10.32419827182441 | -11.10494988370824 | 3.46922094125529  |
| H  | 11.11335523461871 | -10.75426351261844 | 3.98818221866963  |
| C  | 9.11696999301641  | -10.48688883712448 | 3.33274778670246  |
| C  | 10.25670446997164 | -12.27262440682403 | 2.80382588519114  |
| H  | 11.06852691815571 | -12.97026953251051 | 2.74502069628106  |
| N  | 9.07754574659079  | -12.42939292977496 | 2.24761895819235  |
| C  | 8.35221754095629  | -11.31965540293694 | 2.57108888318874  |
| H  | 7.33756444380299  | -11.20380947875286 | 2.24653070143218  |
| C  | 3.78369714317766  | -11.53921937276283 | 5.73604107904887  |
| H  | 3.89737733921995  | -10.48148563825961 | 5.50713543000683  |
| H  | 2.72810775089176  | -11.77328022848231 | 5.82929700381994  |
| C  | 4.39896777771904  | -12.34136646638971 | 4.61844071003677  |
| O  | 3.70267940459157  | -12.91342116257801 | 3.78959015631895  |
| O  | 5.69575494897714  | -12.36161917292983 | 4.62504116044599  |
| Ni | 8.19444583322209  | -14.26058858854235 | 1.70283263944413  |
| Ni | 4.36011424921384  | -13.88949203565358 | 1.93192458680110  |

|   |                   |                    |                   |
|---|-------------------|--------------------|-------------------|
| O | 6.37133005786979  | -13.82640429940836 | 2.67194665560055  |
| H | 6.05967179951501  | -12.93966092411289 | 3.80347071251707  |
| C | 6.40715382276505  | -15.18405536787302 | 2.99771153797618  |
| O | 7.06570189359083  | -15.90239741547946 | 2.10584085462210  |
| O | 8.48763475711926  | -15.00636953558918 | 4.04750630733832  |
| H | 8.87869798432414  | -15.87095199094977 | 3.84626704515828  |
| N | 7.11016867261310  | -15.31319323595556 | 4.31769357937954  |
| N | 5.00602787088980  | -15.64186254652654 | 3.14546012844848  |
| H | 6.81226048248114  | -14.56714459198428 | 4.94641966886628  |
| H | 4.91958458283838  | -16.53363503313328 | 2.66481328845441  |
| H | 4.74509184680721  | -15.75885969134302 | 4.12076055768176  |
| H | 4.30486377605798  | -11.73934602004223 | 6.66789576822864  |
| H | 3.44453752837456  | -9.00340168374803  | 0.09873377911737  |
| H | -0.77827968305487 | -15.02729691496604 | 1.98011192270062  |
| H | 7.91375302430970  | -16.96120934898979 | -1.94746263560343 |
| H | 11.19610630687213 | -13.86632850530818 | 0.15981042347769  |
| H | 8.90353397315356  | -9.53651709826056  | 3.77486863900826  |

**<sup>2</sup>TS3 (110i cm<sup>-1</sup>)**

|   |                  |                    |                   |
|---|------------------|--------------------|-------------------|
| N | 5.51221679876452 | -10.19030425569655 | 0.18589637978336  |
| H | 6.13256195852559 | -9.65217295104091  | -0.39719079609663 |
| C | 4.35585324391028 | -9.74070176802568  | 0.75541773087993  |
| C | 5.66095313703029 | -11.48340439418406 | 0.52697569664662  |
| H | 6.48271901048530 | -12.11089822515578 | 0.22766988950485  |
| N | 4.66057530630982 | -11.87485760695470 | 1.28343622462626  |
| C | 3.83666140107650 | -10.80147014269875 | 1.43638803078102  |
| H | 2.94102864318177 | -10.86205399839673 | 2.02045347887694  |
| N | 0.76745431723725 | -14.55539610469684 | 0.31810017634950  |
| H | 0.16962308276126 | -14.64097771049756 | -0.48844928225009 |
| C | 0.38897300593052 | -14.73656589797504 | 1.61591148573995  |
| C | 2.07652067280954 | -14.24429142560058 | 0.31812554131713  |
| H | 2.65896353450569 | -14.05442362803137 | -0.56092642951580 |
| N | 2.54957868338953 | -14.22046966531450 | 1.54138272055537  |
| C | 1.50874185187169 | -14.52535624150906 | 2.36459002256253  |
| H | 1.62643459347523 | -14.56649059937224 | 3.42799698606037  |
| C | 7.46651322386758 | -16.15391630125283 | -2.04413619136260 |
| H | 8.28198561858612 | -15.53998031456102 | -1.66572160036824 |
| H | 7.37031890748990 | -16.00329113200930 | -3.12206760486839 |
| N | 6.26904230159315 | -15.74820554397632 | -1.35872565428975 |
| H | 5.41547111579539 | -16.25156145093376 | -1.53998379711310 |
| C | 6.21682271767667 | -14.76534084082689 | -0.40902904665459 |
| O | 5.07767971553193 | -14.56497689492172 | 0.08783485951764  |
| O | 7.27039700335686 | -14.10093191897873 | -0.19419860314178 |

|    |                   |                    |                   |
|----|-------------------|--------------------|-------------------|
| N  | 9.93700365733787  | -15.34065528642026 | 0.75787713840010  |
| C  | 10.76436826045335 | -15.02968499331446 | -0.28087943618210 |
| C  | 10.11067064463099 | -16.62040675390270 | 1.00097251335183  |
| H  | 9.58729208103425  | -17.16935528556103 | 1.75922958882085  |
| N  | 11.02168627955966 | -17.14521553161334 | 0.16282143019578  |
| H  | 11.33501536208834 | -18.10258318812391 | 0.14218892051472  |
| C  | 11.44819828529993 | -16.14598671592555 | -0.66144217437285 |
| H  | 12.17931944238334 | -16.30156768440831 | -1.42676539333771 |
| N  | 10.55985037504219 | -10.84750133879894 | 2.54704078463595  |
| H  | 11.41882949001045 | -10.33664151763625 | 2.67540063993674  |
| C  | 9.31561063296397  | -10.42745100764009 | 2.91458014069926  |
| C  | 10.42817874777440 | -12.07127117603013 | 2.00303963441631  |
| H  | 11.25103003125589 | -12.64716031315517 | 1.62869663988135  |
| N  | 9.17225223527863  | -12.45167399861519 | 2.00158803326117  |
| C  | 8.46165460009724  | -11.43283145227812 | 2.56999955476519  |
| H  | 7.39780966986373  | -11.50323162921128 | 2.69043898921769  |
| C  | 3.30389069701635  | -12.21367110215828 | 6.03065330508929  |
| H  | 3.00323670712486  | -12.79264507752439 | 6.89929951484894  |
| H  | 3.92914659823538  | -11.39416867916492 | 6.37814475073529  |
| C  | 4.11130324228117  | -13.07840112547630 | 5.09732757707977  |
| O  | 3.89612913740641  | -13.09911663874787 | 3.89845456198789  |
| O  | 5.02292139828651  | -13.77413340450524 | 5.71714868356330  |
| Ni | 8.29100041759542  | -14.33527248197879 | 1.53725325463960  |
| Ni | 4.55701582986663  | -13.82748843172658 | 1.98819849584570  |
| O  | 6.54942028121413  | -13.95127043085822 | 2.65807896798096  |
| H  | 5.61936693005450  | -14.34000207174637 | 5.13567453332102  |
| C  | 6.52348910189782  | -15.28838279771350 | 2.95423100411797  |
| O  | 7.39541825447825  | -15.99000136046042 | 2.25065791463100  |
| O  | 7.99320132487170  | -14.58985532377748 | 4.66743415092902  |
| H  | 7.80961660094961  | -13.77588476517927 | 4.15471523066193  |
| N  | 6.81691629574633  | -15.37041266096616 | 4.43905099824630  |
| N  | 5.12381132995316  | -15.78374913854859 | 2.80314941622459  |
| H  | 7.09941762751991  | -16.32163653220859 | 4.67368918846474  |
| H  | 5.11974981266183  | -16.46999250289157 | 2.05152100001180  |
| H  | 4.77439370355735  | -16.21631379792510 | 3.65394235643209  |
| H  | 2.43588094008152  | -11.81421579192331 | 5.51660519175720  |
| H  | 4.00587435100858  | -8.73689803734287  | 0.63490779752752  |
| H  | -0.61125489236188 | -14.99435267997751 | 1.89453032280513  |
| H  | 7.68431801493016  | -17.20692657921990 | -1.84936580182735 |
| H  | 10.80541943335359 | -14.03987584758840 | -0.68864770927221 |
| H  | 9.14272556203401  | -9.47986179514477  | 3.37998682245372  |

---

|   |                   |                    |                   |
|---|-------------------|--------------------|-------------------|
| N | 5.58364551902939  | -10.22770237000737 | 0.05744465156364  |
| H | 6.23125081386569  | -9.71582127302191  | -0.51976501202505 |
| C | 4.39198472771156  | -9.76144673296698  | 0.53225000163803  |
| C | 5.72555701832530  | -11.49603151776754 | 0.48339632132324  |
| H | 6.57060589476592  | -12.12599087000469 | 0.26675296652979  |
| N | 4.68779593085208  | -11.85633590306887 | 1.20421709581455  |
| C | 3.84586011821180  | -10.78720437595563 | 1.24494466610603  |
| H | 2.91726919275556  | -10.82241597971121 | 1.77654685349995  |
| N | 0.81949835959800  | -15.00253231172170 | 0.59431539102353  |
| H | 0.26185113438807  | -15.54655305279711 | -0.04468775833023 |
| C | 0.34239833711650  | -14.12706811485518 | 1.52482439977158  |
| C | 2.16145630874385  | -14.99986725566794 | 0.68760379651689  |
| H | 2.81618117886326  | -15.58172608907116 | 0.07111009022930  |
| N | 2.56314633313180  | -14.17318797230287 | 1.62371763904583  |
| C | 1.43858289444579  | -13.61864289071221 | 2.15552652616621  |
| H | 1.49053987598218  | -12.90336510409927 | 2.94982287451804  |
| C | 7.35786502861622  | -15.93046557687888 | -2.28187689111382 |
| H | 8.22908567528879  | -15.50871677992648 | -1.78375358523812 |
| H | 7.24861814617861  | -15.46418403133469 | -3.26506278524404 |
| N | 6.21536243859156  | -15.67680743545191 | -1.44400745532306 |
| H | 5.32235800589986  | -16.04120564430267 | -1.73470631096044 |
| C | 6.21215335071128  | -14.78092316683161 | -0.40614400292382 |
| O | 5.09901472881926  | -14.61806176058505 | 0.15543328913449  |
| O | 7.29708678247663  | -14.18841430965382 | -0.15679210144473 |
| N | 9.91604101510457  | -15.33709756169793 | 0.82048390208072  |
| C | 10.71095449692710 | -15.07452290029135 | -0.25630332780615 |
| C | 10.06005430290958 | -16.61650002896447 | 1.08568892745346  |
| H | 9.55207991098561  | -17.13099900753854 | 1.87807981040553  |
| N | 10.92168414590913 | -17.18705270089936 | 0.22553211196345  |
| H | 11.20474214661649 | -18.15398230166894 | 0.21450475725924  |
| C | 11.34550065964014 | -16.21951932105318 | -0.63709395203138 |
| H | 12.04166071199852 | -16.41380797526474 | -1.42580446841136 |
| N | 10.63913468421155 | -10.84627900531994 | 2.56890322333549  |
| H | 11.51598772372544 | -10.37620782465679 | 2.72836848072606  |
| C | 9.40615319986768  | -10.38068693254052 | 2.91808831607752  |
| C | 10.46795716719919 | -12.05219116529780 | 1.99713148384585  |
| H | 11.27377637982005 | -12.65391675152350 | 1.62610868170058  |
| N | 9.19676240563451  | -12.37840109964597 | 1.95923616739752  |
| C | 8.51804988535407  | -11.34075974636546 | 2.53346752460723  |
| H | 7.45018755287719  | -11.36540994477447 | 2.63273282890684  |
| C | 2.73537400969692  | -12.46946097786261 | 5.90877772597063  |
| H | 1.90730468654513  | -13.16078709875526 | 6.05383896785330  |
| H | 3.13669304545156  | -12.21690760084413 | 6.88553999954889  |

|    |                   |                    |                   |
|----|-------------------|--------------------|-------------------|
| C  | 3.79406828675897  | -13.15273620527542 | 5.08077642749468  |
| O  | 3.91019755374039  | -12.93348924405439 | 3.88650242095290  |
| O  | 4.52338842264396  | -13.97880295699720 | 5.77338989978088  |
| Ni | 8.30092303147535  | -14.28067310252258 | 1.59611220737818  |
| Ni | 4.58465110934252  | -13.76131256611701 | 2.02316340487659  |
| O  | 6.57531808798584  | -13.83221007407899 | 2.71377529586968  |
| H  | 5.29054460419438  | -14.40809051976271 | 5.27200278466599  |
| C  | 6.55045918614942  | -15.13560913961854 | 3.12658277756263  |
| O  | 7.50328281696090  | -15.85957738024021 | 2.56087970046281  |
| O  | 7.63771402988796  | -14.11463628951535 | 4.98027520503588  |
| H  | 7.49917668121677  | -13.44948221889024 | 4.26796487529956  |
| N  | 6.68183438111650  | -15.11537867787727 | 4.63452789771075  |
| N  | 5.18026156603849  | -15.68603169546505 | 2.88450423559662  |
| H  | 7.09876579118379  | -15.99528943832417 | 4.93891098471106  |
| H  | 5.25503849625828  | -16.34457319593942 | 2.11121988446659  |
| H  | 4.81639912975852  | -16.17193403174937 | 3.69983831856140  |
| H  | 2.37518646113981  | -11.57987599454959 | 5.40205604926364  |
| H  | 4.03854734982465  | -8.77167881689596  | 0.33216854670052  |
| H  | -0.70246377733646 | -13.94179410845259 | 1.66014943389995  |
| H  | 7.49481332309836  | -17.00531271150347 | -2.41216334662729 |
| H  | 10.76666570531867 | -14.09527337121007 | -0.68714789808775 |
| H  | 9.26247173839843  | -9.43654643729606  | 3.39992007326315  |

**<sup>2</sup>TS4 (143i cm<sup>-1</sup>)**

|   |                  |                    |                   |
|---|------------------|--------------------|-------------------|
| N | 5.55078613602057 | -10.15373882370988 | 0.10393292974191  |
| H | 6.16184894247831 | -9.64168272591956  | -0.51170098459277 |
| C | 4.42188478776362 | -9.66766232195321  | 0.69804466318280  |
| C | 5.68469678890196 | -11.44117877971436 | 0.47319080603412  |
| H | 6.48973999921448 | -12.08505809987760 | 0.16714773847044  |
| N | 4.70128570403378 | -11.79355539000486 | 1.26986631095787  |
| C | 3.90412638766699 | -10.70070673983416 | 1.42140950750326  |
| H | 3.02885355680856 | -10.72820865456089 | 2.03705462793586  |
| N | 0.80926588591463 | -14.87126919075224 | 0.55837432650369  |
| H | 0.23942445127227 | -15.38754672663657 | -0.09285194700574 |
| C | 0.34917083096858 | -14.04657150058430 | 1.54301128987269  |
| C | 2.15305291744883 | -14.86494964620888 | 0.62090551749172  |
| H | 2.79740493150015 | -15.41195772312141 | -0.03712709448284 |
| N | 2.57013827981399 | -14.08301049787452 | 1.58827994851869  |
| C | 1.45617737673491 | -13.56241974261385 | 2.17362278210139  |
| H | 1.52760343755000 | -12.89027545326764 | 3.00335186083946  |
| C | 7.44443094087939 | -15.98576049457619 | -2.16338780024237 |
| H | 8.30903075529526 | -15.56284176156651 | -1.65485622627711 |
| H | 7.36477256797720 | -15.54265180853847 | -3.16014544871416 |



---

|    |                   |                    |                   |
|----|-------------------|--------------------|-------------------|
| N  | 6.28529789228056  | -15.69809286445941 | -1.36052938079804 |
| H  | 5.39570384337414  | -16.05871404866155 | -1.66693859173389 |
| C  | 6.25770381703183  | -14.76604778963818 | -0.35302342349805 |
| O  | 5.13648731361587  | -14.56687570284093 | 0.16638867024580  |
| O  | 7.34788131444994  | -14.17529762356688 | -0.09528141570462 |
| N  | 9.93404360681154  | -15.39001392823785 | 0.89064486678209  |
| C  | 10.75299918097742 | -15.15052423450769 | -0.17409822029230 |
| C  | 10.05637501966988 | -16.66873296217606 | 1.17425311185711  |
| H  | 9.52589452844325  | -17.16829993657323 | 1.96168378330561  |
| N  | 10.92682517629469 | -17.25942285867344 | 0.33800014484869  |
| H  | 11.19805920754709 | -18.22993602889218 | 0.34410134733486  |
| C  | 11.37961720709798 | -16.30844754547218 | -0.52786024383891 |
| H  | 12.08796597446437 | -16.52135244827970 | -1.30082757016402 |
| N  | 10.59233833845389 | -10.72859243641195 | 2.31503842295076  |
| H  | 11.44757536777323 | -10.20052101041830 | 2.38864661261376  |
| C  | 9.35000775150228  | -10.29326200086106 | 2.66997779319717  |
| C  | 10.46648190475854 | -11.99147129948769 | 1.87037661187871  |
| H  | 11.28995274529234 | -12.58580366556797 | 1.52700672697852  |
| N  | 9.21380234346200  | -12.38371722253603 | 1.92056579521080  |
| C  | 8.50085382864129  | -11.33007441399145 | 2.42045010474632  |
| H  | 7.43958001563889  | -11.39617272954087 | 2.56405987775932  |
| C  | 2.72084607059124  | -12.72174406706751 | 5.92959172272984  |
| H  | 1.82654604308751  | -13.34039520814632 | 5.96665254819152  |
| H  | 3.10325080499336  | -12.61303263767506 | 6.94022174131377  |
| C  | 3.76068596190860  | -13.42890560743033 | 5.06618893206383  |
| O  | 3.91405765435760  | -12.99659326547022 | 3.90651243733443  |
| O  | 4.36476689759796  | -14.39317952083494 | 5.59530266520425  |
| Ni | 8.34787499692566  | -14.28899683599765 | 1.64681351759875  |
| Ni | 4.57530634760212  | -13.71061573236488 | 2.04485989579362  |
| O  | 6.58963715341372  | -13.82722918568097 | 2.71525051617575  |
| H  | 5.65581732178973  | -14.75864116870718 | 5.14866497530047  |
| C  | 6.51553855830635  | -15.11449248508923 | 3.08360916818569  |
| O  | 7.46832863020563  | -15.86831232567952 | 2.61870321027738  |
| O  | 7.58364443888561  | -13.99475498826835 | 4.99675196398116  |
| H  | 7.43212052008853  | -13.38107205202400 | 4.22979564263776  |
| N  | 6.67990459784940  | -15.02583163805287 | 4.72033672846100  |
| N  | 5.15340487584049  | -15.64827194058979 | 2.90468785749486  |
| H  | 7.07279630177497  | -15.89216427127533 | 5.09350570591904  |
| H  | 5.19652813016711  | -16.43844176496956 | 2.26749084545293  |
| H  | 4.69148255640521  | -15.92049483950053 | 3.76793968123239  |
| H  | 2.47643554798323  | -11.75206961387580 | 5.50742989977326  |
| H  | 4.08758211150189  | -8.66034475627290  | 0.56316585991194  |
| H  | -0.69343625045565 | -13.87602307264028 | 1.71124731053659  |

---

|   |                   |                    |                   |
|---|-------------------|--------------------|-------------------|
| H | 7.56893791742432  | -17.06520805024164 | -2.26491966804050 |
| H | 10.82816734161091 | -14.17815082339560 | -0.61729161273527 |
| H | 9.17349108431996  | -9.31479324663972  | 3.06457733368696  |

**<sup>2</sup>P**

|   |                   |                    |                   |
|---|-------------------|--------------------|-------------------|
| N | 3.88901152602084  | -8.93318825086746  | 1.27748918429899  |
| H | 4.12804469731695  | -8.01864433369922  | 0.92868489280133  |
| C | 2.88678204941647  | -9.21320546686995  | 2.15975180152215  |
| C | 4.49431117831651  | -10.09429216663396 | 0.96866652240706  |
| H | 5.32027322806344  | -10.19598448047148 | 0.29279277489154  |
| N | 3.92785879408545  | -11.09385344927305 | 1.60318591478258  |
| C | 2.92263103071210  | -10.56212182229963 | 2.35324394603524  |
| H | 2.30883531921850  | -11.17603397431573 | 2.98135478975520  |
| N | 2.33280550921477  | -15.51097814072413 | -0.72383979103850 |
| H | 2.23981243391972  | -16.32408122580579 | -1.31155723408016 |
| C | 1.32332818152624  | -14.67371410896694 | -0.34957770579644 |
| C | 3.46593378359541  | -15.05886509351162 | -0.15763638896582 |
| H | 4.42491392086972  | -15.52192704890692 | -0.28255605506414 |
| N | 3.23074086760902  | -13.98016397053332 | 0.55293897948080  |
| C | 1.89725545309238  | -13.72515915388291 | 0.44393284390521  |
| H | 1.44309059185489  | -12.89145147483011 | 0.93903149352133  |
| C | 6.65323024584697  | -14.42514952876805 | -3.07635848984042 |
| H | 7.21937374865934  | -15.21788855270387 | -2.59145686785634 |
| H | 7.33830958041903  | -13.81047049363541 | -3.66841982669454 |
| N | 5.99757366521424  | -13.66320197201242 | -2.04341839114974 |
| H | 5.37730351724366  | -12.91988409279971 | -2.32503361044331 |
| C | 6.44700283827993  | -13.59971170806246 | -0.74399581097766 |
| O | 5.90174762990408  | -12.72734803022902 | -0.02406656707213 |
| O | 7.36035145780957  | -14.41032655384155 | -0.42954312649456 |
| N | 9.59631604624187  | -15.91222790834440 | 1.07709848971991  |
| C | 10.10164391143092 | -16.05246045679879 | -0.18272422804199 |
| C | 10.02755257629536 | -16.94393959172800 | 1.76772540346037  |
| H | 9.80307673966191  | -17.13901201805967 | 2.79728713123856  |
| N | 10.79575271598550 | -17.74036759144063 | 1.00542354282269  |
| H | 11.23901210508544 | -18.59866417935206 | 1.29267218438524  |
| C | 10.85141182218968 | -17.18932481790984 | -0.24049566369388 |
| H | 11.40177087463858 | -17.63418542502455 | -1.04285450605325 |
| N | 10.27142094709293 | -11.21957695630503 | 0.81685120399241  |
| H | 11.08733642155274 | -10.71723166757410 | 0.50498863791070  |
| C | 9.10515690930211  | -10.66292259501732 | 1.25657744495943  |
| C | 10.12917598579596 | -12.55532251641340 | 0.88260506508057  |
| H | 10.89368789263349 | -13.25087625773464 | 0.59901439838208  |
| N | 8.94142326076128  | -12.87301227525902 | 1.34154618958450  |

|    |                  |                    |                   |
|----|------------------|--------------------|-------------------|
| C  | 8.28559350707594 | -11.70277472495181 | 1.58188892335406  |
| H  | 7.27771703445653 | -11.69038218758706 | 1.95203949251820  |
| C  | 4.97598701345142 | -13.27315987757450 | 5.68441595215447  |
| H  | 4.06432076104701 | -13.70071503784439 | 6.09007195677438  |
| H  | 5.81697384527678 | -13.94110860888055 | 5.86720808406584  |
| C  | 4.83539829976881 | -13.05972368534824 | 4.19855996623073  |
| O  | 3.81468202707045 | -13.4608895846678  | 3.59413741308006  |
| O  | 5.77128805333406 | -12.49125124534275 | 3.56723551425363  |
| Ni | 7.98807362380594 | -14.71178301122634 | 1.53825916023556  |
| Ni | 4.70168142445537 | -13.01044006539498 | 1.68585808060744  |
| O  | 5.84419595027154 | -14.70864510888727 | 1.89821456607182  |
| H  | 7.62242542935214 | -15.78877537481301 | 4.38917733010639  |
| C  | 5.88802122109480 | -15.86022322762343 | 2.42372002706869  |
| O  | 6.97863739097838 | -16.48380195081566 | 2.44430973962219  |
| N  | 7.87015573333033 | -14.88184176975518 | 4.79131064338714  |
| N  | 4.75029488338054 | -16.39646202628389 | 2.92503342320516  |
| H  | 8.79187130492519 | -14.97047448871654 | 5.21706144229156  |
| O  | 8.05531080370647 | -13.98209559906985 | 3.68742842336417  |
| H  | 7.26337101325604 | -13.37536337862709 | 3.69861055103819  |
| H  | 4.80073070709952 | -17.23689886303029 | 3.47388343262377  |
| H  | 3.98200949840406 | -15.75952587393553 | 3.08006645455623  |
| H  | 5.18933850777618 | -12.32211551832182 | 6.16612623953399  |
| H  | 2.24867995204147 | -8.45734744607075  | 2.56701969251615  |
| H  | 0.31071021426772 | -14.81401173942507 | -0.66480930555069 |
| H  | 5.90813296717703 | -14.86130023705905 | -3.74265914590847 |
| H  | 9.87684410919842 | -15.34014756479775 | -0.95059752722697 |
| H  | 8.96020311712088 | -9.60417287954422  | 1.30744728835138  |

The Cartesian coordinates for stationary points concerning the NBPTO inhibition process optimized at the UB3LYP-D3BJ/def2-SVP level

<sup>3</sup>RS<sub>QM</sub>

|   |                  |                    |                   |
|---|------------------|--------------------|-------------------|
| N | 5.86771363993451 | -9.82095418902344  | 1.43475993818473  |
| H | 6.22152260057460 | -8.89522541466338  | 1.64332261811776  |
| C | 5.46921862240574 | -10.28709024390307 | 0.19585832081789  |
| C | 5.67030150132293 | -10.80627743528644 | 2.34654090605879  |
| H | 5.90570800940698 | -10.74493429822122 | 3.41100103592659  |
| N | 5.16738586054486 | -11.87393274694486 | 1.75102956786954  |
| C | 5.03703858893561 | -11.57283635198991 | 0.41390261270261  |
| H | 4.65182601412941 | -12.30072126906914 | -0.29391825709600 |
| N | 0.88900336418868 | -13.69570773769492 | 0.95771359176144  |
| H | 0.24521800216038 | -13.82685458926779 | 0.18629567933303  |
| C | 0.57123791924121 | -13.19388985680609 | 2.20463558380513  |
| C | 2.21476405340904 | -13.98344091525322 | 0.94418928926737  |

---

|    |                   |                    |                   |
|----|-------------------|--------------------|-------------------|
| H  | 2.76024688967409  | -14.39493004069072 | 0.09960787692506  |
| N  | 2.75508591863543  | -13.69179627953972 | 2.11382083432762  |
| C  | 1.74754044383177  | -13.19783348033529 | 2.91429009591563  |
| H  | 1.96223958200263  | -12.88948189783856 | 3.93328436724696  |
| C  | 6.80281258435332  | -15.56688019495825 | -2.28378209475114 |
| H  | 7.77099788861501  | -15.68467114809714 | -1.78015256997638 |
| H  | 6.89511648375420  | -14.73726789340729 | -3.00949024772670 |
| N  | 5.78687959381164  | -15.32747906421062 | -1.28484732045669 |
| H  | 4.82224482946668  | -15.54714761219551 | -1.49353587528018 |
| C  | 6.03412175035310  | -14.82273741395309 | -0.03561434197159 |
| O  | 5.04012011452416  | -14.68965788793168 | 0.73828888516610  |
| O  | 7.24050690402626  | -14.51954039997412 | 0.22733565990362  |
| N  | 9.65254841663756  | -15.53998471862177 | 1.61094653829926  |
| C  | 10.92470283316674 | -15.09042680618825 | 1.33405960289421  |
| C  | 9.64475720766450  | -16.84636202805930 | 1.40325377027374  |
| H  | 8.77645025967224  | -17.48529318695103 | 1.54590004658468  |
| N  | 10.87199119153026 | -17.25529338122914 | 1.00244774259139  |
| H  | 11.13369455306636 | -18.20964349665378 | 0.78343347056481  |
| C  | 11.70395442325470 | -16.15475298204383 | 0.95277371315929  |
| H  | 12.74820484810597 | -16.22471701774045 | 0.66231554744981  |
| N  | 9.19937584635045  | -10.73352634602050 | 0.67849793924682  |
| H  | 9.28640751058349  | -10.08285570336227 | -0.09323570279347 |
| C  | 9.48842268217534  | -10.46962476261395 | 2.00386489388251  |
| C  | 8.78818615797305  | -12.02172872758700 | 0.58040913302644  |
| H  | 8.45815599853692  | -12.51201850947319 | -0.33248225478083 |
| N  | 8.80790586080156  | -12.59115387807401 | 1.77216179922954  |
| C  | 9.23351858781390  | -11.64134983801861 | 2.67437331888218  |
| H  | 9.31330152116198  | -11.85291915253079 | 3.73798718610255  |
| C  | 4.14580664959340  | -12.12475565632425 | 6.65236737571920  |
| H  | 3.54307559225028  | -12.97979189578364 | 6.98851420821616  |
| H  | 4.87912508305013  | -11.84255365340577 | 7.41918623080160  |
| C  | 4.83786468575901  | -12.42610870408826 | 5.33058044591676  |
| O  | 4.19316924000532  | -13.17373849364541 | 4.52156267470027  |
| O  | 5.95970740172020  | -11.91686941781528 | 5.11177024899101  |
| Ni | 7.95577008542351  | -14.47674796765218 | 2.09899361128045  |
| Ni | 4.80180825662180  | -13.73638507526445 | 2.62353621641975  |
| O  | 6.69964763698992  | -13.78120236611338 | 3.36643680646697  |
| H  | 6.71027570036303  | -12.93940185820119 | 3.87225405931504  |
| O  | 7.03705760786831  | -16.42995940578448 | 2.60510661673764  |
| N  | 6.46298577544187  | -15.83936372605872 | 5.10965706193177  |
| H  | 6.72086701789774  | -14.87899639331634 | 4.81998986486340  |
| N  | 4.51837523325058  | -15.86341495344053 | 3.25104708433411  |
| H  | 4.09945961666950  | -16.24727344798589 | 2.40399539345388  |

|   |                   |                    |                   |
|---|-------------------|--------------------|-------------------|
| H | 3.83272877993416  | -15.75076304255056 | 3.99818080912790  |
| P | 6.00531612877808  | -16.57410625997368 | 3.70225368127483  |
| C | 5.66701556195331  | -15.89139086175764 | 6.33432173732065  |
| H | 5.56285398246171  | -16.94275233467792 | 6.65380205756910  |
| H | 4.64414147517090  | -15.49165173034563 | 6.17861134853966  |
| C | 6.33851188050860  | -15.07254259363743 | 7.43182488205883  |
| H | 7.35126770457105  | -15.47505086266277 | 7.60530719841296  |
| H | 6.47496609864474  | -14.04102167899300 | 7.06197499723617  |
| C | 5.54551283099152  | -15.04954929741895 | 8.73790173088069  |
| H | 5.44336839974890  | -16.07998990634599 | 9.12331221788232  |
| H | 4.51830401033062  | -14.69947509230624 | 8.53221415399136  |
| C | 6.18288101128117  | -14.16012330499090 | 9.80350002256092  |
| H | 5.59858428401899  | -14.16379254237896 | 10.73643389648207 |
| H | 7.20389522638971  | -14.49722950343120 | 10.04638460923295 |
| H | 6.25390516760473  | -13.11640658846237 | 9.45568199284790  |
| N | 5.64749949906251  | -18.18679942978124 | 3.95988608334025  |
| H | 6.43956468779616  | -18.78501965276009 | 4.18403068641759  |
| H | 4.82920286817159  | -18.41223200389483 | 4.51864784757046  |
| H | 3.46089749902036  | -11.27304753640535 | 6.50527887353484  |
| H | 6.57968078033432  | -16.48747688057281 | -2.84528547530435 |
| H | 11.19292651900927 | -14.04182558844493 | 1.42905804647300  |
| H | 9.84812803485905  | -9.50236919437594  | 2.34318262007714  |
| H | -0.43681192480253 | -12.88710663674142 | 2.46876442034032  |
| H | 5.51538289345762  | -9.67591323578364  | -0.70104373770045 |

<sup>3</sup>TS<sub>QM</sub>

|   |                  |                    |                   |
|---|------------------|--------------------|-------------------|
| N | 6.07527991766041 | -9.87503918163800  | 1.75207018274445  |
| H | 6.45228024612927 | -9.01492150862445  | 2.13116757160508  |
| C | 5.73659453205083 | -10.10834262123389 | 0.43081319526676  |
| C | 5.77186557445853 | -10.97956597222181 | 2.47807484853032  |
| H | 5.91766463765857 | -11.12013764855037 | 3.55395964384807  |
| N | 5.25654515174755 | -11.89986081692052 | 1.68088042174072  |
| C | 5.22665103648060 | -11.38322607337846 | 0.40547187667125  |
| H | 4.84489426444975 | -11.96147109483212 | -0.43156278205109 |
| N | 0.76710603957610 | -13.61563639944985 | 0.41215537918578  |
| H | 0.14093335376326 | -13.85897133292295 | -0.34639033159624 |
| C | 0.43565108890239 | -12.88489931684558 | 1.53709254818438  |
| C | 2.07181249244312 | -13.96848061302044 | 0.50517000120261  |
| H | 2.62150689612225 | -14.55515337040607 | -0.22513956671582 |
| N | 2.58703492647438 | -13.50003409985565 | 1.62876773455541  |
| C | 1.58357272219548 | -12.82360151577952 | 2.28753626432765  |
| H | 1.76831334238092 | -12.37060200899482 | 3.25636484901068  |
| C | 6.83347376998544 | -14.96735437856371 | -2.58462230359620 |

---

|    |                   |                    |                   |
|----|-------------------|--------------------|-------------------|
| H  | 7.73706022674013  | -15.31311589941719 | -2.06575730242526 |
| H  | 7.07095353486789  | -14.00662554819577 | -3.07835643705344 |
| N  | 5.75722323186768  | -14.85247669070280 | -1.62689540342090 |
| H  | 4.80079212930383  | -14.95774809564690 | -1.93749415169884 |
| C  | 5.93574323352189  | -14.66452725425150 | -0.28319354444159 |
| O  | 4.89512881529698  | -14.64036857703544 | 0.43792675032645  |
| O  | 7.13462980034073  | -14.51976674203789 | 0.11650929187756  |
| N  | 9.51215397799283  | -15.73354168525059 | 1.38005595340203  |
| C  | 10.66965822651189 | -15.21743648378627 | 0.84278870468641  |
| C  | 9.61465054890323  | -17.05191131840304 | 1.33448192331335  |
| H  | 8.84888248657533  | -17.73849902062781 | 1.69017267746562  |
| N  | 10.80263968473834 | -17.40315019084578 | 0.78739385352926  |
| H  | 11.12657130584691 | -18.35227508300490 | 0.63985219791941  |
| C  | 11.49212513798790 | -16.25096124847344 | 0.46649024193631  |
| H  | 12.47954801222597 | -16.26828547193259 | 0.01423362185291  |
| N  | 9.20925771962758  | -10.96668386291799 | 1.41266140604047  |
| H  | 9.43998841672907  | -10.20343400830231 | 0.78758618096807  |
| C  | 9.34588780332660  | -10.96485453759997 | 2.78759647774356  |
| C  | 8.71120872716434  | -12.17036689063876 | 1.03557849918861  |
| H  | 8.46387424125413  | -12.46056384167400 | 0.01705107948039  |
| N  | 8.53324889687751  | -12.93484565379838 | 2.09810006596599  |
| C  | 8.91402880005468  | -12.20226528776237 | 3.19947799182572  |
| H  | 8.83007418851160  | -12.59415617978224 | 4.20991832788725  |
| C  | 3.52998025342590  | -12.60619379937735 | 6.45070717905484  |
| H  | 3.11583311581410  | -13.59346972882521 | 6.70625317279245  |
| H  | 4.11373179290010  | -12.20974292691097 | 7.29089475968233  |
| C  | 4.37561719120420  | -12.68936598879388 | 5.18440694702573  |
| O  | 3.79161243358367  | -13.26930787889920 | 4.19274249152407  |
| O  | 5.51819381356932  | -12.21181231275813 | 5.17207202193214  |
| Ni | 7.74463877918842  | -14.83977989814895 | 1.97444419027141  |
| Ni | 4.56374007885042  | -13.72364730555588 | 2.28967450692805  |
| O  | 6.20619474084943  | -14.47604456125993 | 3.20397183973523  |
| H  | 6.59187042205087  | -14.36189387904899 | 4.42662958133032  |
| O  | 7.13324752135455  | -16.62755014063114 | 2.72961999743007  |
| N  | 6.80540212571587  | -15.27602269606836 | 5.23585443055742  |
| H  | 7.79995290249869  | -15.50673812484841 | 5.30776259601118  |
| N  | 4.40446917976327  | -16.03986977310056 | 3.78721482132339  |
| H  | 3.84652491319838  | -16.85973836733399 | 3.99985335977472  |
| H  | 3.99220904756631  | -15.13550780894441 | 4.04548109084194  |
| P  | 6.07107157346862  | -16.23578612202117 | 3.80629722291111  |
| C  | 6.16729229244593  | -15.31260253653584 | 6.55719827355174  |
| H  | 6.26254034551734  | -16.32553407794889 | 6.98737126001024  |
| H  | 5.09364952899627  | -15.12737249581486 | 6.40645187483611  |

|   |                   |                    |                   |
|---|-------------------|--------------------|-------------------|
| C | 6.75468471231593  | -14.26373721444685 | 7.49482345805785  |
| H | 7.83746372187947  | -14.45418818637755 | 7.61910197435542  |
| H | 6.65153794082610  | -13.27922919781427 | 7.01030879333879  |
| C | 6.08019959884763  | -14.25038692536818 | 8.86721515346249  |
| H | 6.18843343732891  | -15.24076180927284 | 9.34496604624946  |
| H | 4.99547053459475  | -14.09572457141393 | 8.73210870929532  |
| C | 6.63935374951764  | -13.16795373495494 | 9.78841889086640  |
| H | 6.13834692942545  | -13.17266914381489 | 10.76846368236116 |
| H | 7.71831014602800  | -13.31112715638453 | 9.96426360843608  |
| H | 6.50628506975934  | -12.16674121843082 | 9.34681914244412  |
| N | 5.98116942147329  | -17.79689206873991 | 4.51877545268784  |
| H | 6.81030253496684  | -18.37456945464141 | 4.43686929981928  |
| H | 5.49498701410565  | -17.92571184430948 | 5.40089199670121  |
| H | 2.66950674763515  | -11.94274323824858 | 6.26750241250081  |
| H | 6.57119332503746  | -15.69670670230304 | -3.36619698906332 |
| H | 10.83722931698391 | -14.14682168011500 | 0.76513656884873  |
| H | 9.72988485711194  | -10.10992170056813 | 3.33675315481808  |
| H | -0.56211705415871 | -12.48802427488170 | 1.70051198035990  |
| H | 5.86990316561287  | -9.36229871975972  | -0.34750623234772 |

<sup>3</sup>PS<sub>QM</sub>

|   |                  |                    |                   |
|---|------------------|--------------------|-------------------|
| N | 5.78619247070265 | -10.15472466606581 | 2.51116426956718  |
| H | 6.05344172286595 | -9.37948529743712  | 3.10560610244711  |
| C | 5.68597454923710 | -10.13142811280234 | 1.13111692073436  |
| C | 5.41044468260931 | -11.38115522981252 | 2.95212474527133  |
| H | 5.38103299110468 | -11.73605491243607 | 3.99055997002500  |
| N | 5.07835046157835 | -12.13681497945870 | 1.91898962903189  |
| C | 5.24259938420573 | -11.38209805759851 | 0.77812599507397  |
| H | 5.03245615951932 | -11.78859742535322 | -0.20722253684910 |
| N | 0.80533618876251 | -13.17503424208129 | -0.11979092359756 |
| H | 0.27558524830969 | -13.12409819542889 | -0.98206325843929 |
| C | 0.34847885578201 | -12.82511142958812 | 1.13592595218017  |
| C | 2.08437610884693 | -13.60862123267060 | 0.00166366723946  |
| H | 2.70989989258702 | -13.95694565116709 | -0.81498128204357 |
| N | 2.46188360096490 | -13.55245485470374 | 1.26608261804405  |
| C | 1.39557719924497 | -13.06809512679445 | 1.99083394393933  |
| H | 1.47136383988315 | -12.95054650681883 | 3.06768780178728  |
| C | 7.06529130234943 | -14.22748932289539 | -2.78987041742170 |
| H | 7.90439943896266 | -14.74026877485899 | -2.30260244357607 |
| H | 7.39143186712894 | -13.20270148895329 | -3.04597186211687 |
| N | 5.92787857199890 | -14.24324883656669 | -1.89676913890704 |
| H | 4.99509207286199 | -14.17047564047077 | -2.28020958679818 |
| C | 6.00560448393682 | -14.42727663731955 | -0.54318272543962 |

---

|    |                   |                    |                   |
|----|-------------------|--------------------|-------------------|
| O  | 4.91717242971618  | -14.48626726496314 | 0.09816712763081  |
| O  | 7.17894215606107  | -14.51490894544766 | -0.05275715939874 |
| N  | 9.30292676043806  | -16.18753240300721 | 1.27273664247274  |
| C  | 10.58338849496949 | -15.74380253956047 | 1.02659946480971  |
| C  | 9.29411312628643  | -17.49776333584054 | 1.07553229665140  |
| H  | 8.41571237674447  | -18.12976135294212 | 1.19431533818841  |
| N  | 10.52889777785359 | -17.91166496329784 | 0.71160868711363  |
| H  | 10.79160153091050 | -18.86913010691885 | 0.50603130455283  |
| C  | 11.36638555932880 | -16.81455643447059 | 0.67354508257882  |
| H  | 12.41709216982145 | -16.89078579784962 | 0.40911077856600  |
| N  | 9.04705459754119  | -11.30596131821969 | 2.11849696070911  |
| H  | 9.32217901893387  | -10.43074387428953 | 1.68862814773350  |
| C  | 8.93727658096457  | -11.55071057662991 | 3.47395940044913  |
| C  | 8.70824255839513  | -12.43531878091067 | 1.45263505022164  |
| H  | 8.65768360991425  | -12.53644515225094 | 0.37123997166938  |
| N  | 8.39858998498737  | -13.38802161088383 | 2.31558706883343  |
| C  | 8.52435932811915  | -12.85524574389064 | 3.58009064566333  |
| H  | 8.27299684220160  | -13.42023863938899 | 4.47235885463648  |
| C  | 3.22940520608015  | -14.46642515273155 | 6.19765742250320  |
| H  | 3.55080462392145  | -15.52093340403512 | 6.22226471547686  |
| H  | 3.48166935146414  | -13.99334067722212 | 7.15561499350776  |
| C  | 3.95689483252011  | -13.79222103367422 | 5.04302317606108  |
| O  | 3.44779974311675  | -14.00926280266380 | 3.88919539749191  |
| O  | 4.98752202779900  | -13.13161815301860 | 5.27206797550598  |
| Ni | 7.60596069535905  | -15.18352328429667 | 1.74354771650798  |
| Ni | 4.30982061187093  | -14.02571075469691 | 2.06298605978446  |
| O  | 6.01455137251062  | -14.93633694688073 | 2.99507060624397  |
| H  | 6.44896026019466  | -14.52574440144518 | 5.45853965722532  |
| O  | 6.49835242442281  | -17.08440530339295 | 1.85607785269581  |
| N  | 6.90670335312030  | -15.29520096778782 | 5.96463027339964  |
| H  | 7.89061377168620  | -15.30488576688818 | 5.69244290676798  |
| N  | 3.98031934447915  | -16.30887976192127 | 2.18353339987437  |
| H  | 3.86403875503687  | -16.69540758702025 | 1.25017960918509  |
| H  | 3.19545892481975  | -16.46414915715804 | 2.81186377157029  |
| P  | 5.53723418956867  | -16.43062234604063 | 2.85730187010952  |
| C  | 6.78003170847912  | -15.05978410868575 | 7.40513149015176  |
| H  | 7.32107851688776  | -15.85745667586771 | 7.94341390362545  |
| H  | 5.71680408459839  | -15.17617506594304 | 7.67122697370709  |
| C  | 7.26272582839253  | -13.68465005540438 | 7.86717541429202  |
| H  | 8.32683280919080  | -13.56135632406763 | 7.58524814845437  |
| H  | 6.69247572825623  | -12.92379327268330 | 7.30666230830701  |
| C  | 7.10479355870243  | -13.45455851477282 | 9.37022118225657  |
| H  | 7.65380992128138  | -14.23923412594596 | 9.92171101783909  |



|   |                   |                    |                   |
|---|-------------------|--------------------|-------------------|
| H | 6.04202298276072  | -13.58253157476882 | 9.64378307800808  |
| C | 7.58673660576456  | -12.07750820411209 | 9.82350179587277  |
| H | 7.45329276012269  | -11.93617125168834 | 10.90730177487308 |
| H | 8.65718275052308  | -11.93560996884132 | 9.59843778817847  |
| H | 7.03194903932689  | -11.27416416256778 | 9.31083949010974  |
| N | 5.37143870957553  | -17.04400793387676 | 4.37060070985569  |
| H | 5.96603901260838  | -16.54882896302494 | 5.08980798762404  |
| H | 5.29849845996806  | -18.05191539263478 | 4.47672461211781  |
| H | 2.14181831309006  | -14.45828555125136 | 6.03840392639778  |
| H | 6.82474471578573  | -14.75362582730570 | -3.72661090188274 |
| H | 10.85551132939936 | -14.69626034551171 | 1.12270582843218  |
| H | 9.15144151728579  | -10.79616071777255 | 4.22518965547323  |
| H | -0.65598686520956 | -12.44805164386096 | 1.30523433010103  |
| H | 5.91565221860725  | -9.24766061648922  | 0.54256877905955  |

The Cartesian coordinates for stationary points concerning the NBPTO inhibition process optimized at the GFN2-xTB level

### <sup>3</sup>RS<sub>SQM</sub>

|   |                   |                    |                   |
|---|-------------------|--------------------|-------------------|
| N | 6.02978580748889  | -9.88466089954230  | 1.20074517265009  |
| H | 6.54557547446232  | -9.02637443160844  | 1.30811129769942  |
| C | 5.35420830772474  | -10.28277885698457 | 0.08357631808075  |
| C | 5.84232049419223  | -10.82760723527370 | 2.14366537257063  |
| H | 6.26174233785484  | -10.76916069427109 | 3.12982676472148  |
| N | 5.08667303943311  | -11.79832065425208 | 1.68721865815852  |
| C | 4.77382928253737  | -11.47362156798886 | 0.40226027235492  |
| H | 4.16546139840872  | -12.11487868183655 | -0.20190094339410 |
| N | 0.70779028824197  | -13.81906582770057 | 1.35029897860177  |
| H | -0.00927041908879 | -14.13446019907188 | 0.71653381712037  |
| C | 0.52581401515745  | -12.97536302014253 | 2.40729649460196  |
| C | 2.01240900229705  | -14.14832849747057 | 1.31783550993403  |
| H | 2.45712555811822  | -14.79787193342289 | 0.59106998324885  |
| N | 2.66762781916012  | -13.56134499832254 | 2.29179826069292  |
| C | 1.75254057094292  | -12.82409523057465 | 2.98143448638754  |
| H | 2.04363315873218  | -12.25002788943570 | 3.83649333684642  |
| C | 6.69971971893063  | -16.09608466879793 | -1.89616736080359 |
| H | 7.66339245955291  | -15.77307422781257 | -1.50620281063122 |
| H | 6.52255195477698  | -15.60949980716112 | -2.85966831004785 |
| N | 5.70172177285358  | -15.73053461255055 | -0.92584477250620 |
| H | 4.74921856696656  | -16.01114583636440 | -1.09365743107813 |
| C | 5.92446820834539  | -14.86443225728289 | 0.11627747384936  |

---

|   |                   |                    |                   |
|---|-------------------|--------------------|-------------------|
| O | 4.92253781682159  | -14.60102887172961 | 0.81996273569308  |
| O | 7.09597606740128  | -14.40498050141311 | 0.22631597156574  |
| N | 9.71538180771629  | -15.60981997566498 | 1.08996018075625  |
| C | 10.99323657422028 | -15.35422701386091 | 0.69024760389003  |
| C | 9.47833753288685  | -16.87031872169526 | 0.79688785026827  |
| H | 8.55439608356571  | -17.37721820104976 | 1.00074254892901  |
| N | 10.55542466301951 | -17.43504187486775 | 0.22460497575023  |
| H | 10.63762383090779 | -18.39005633037728 | -0.08637337965536 |
| C | 11.53016976108765 | -16.48472163554376 | 0.14952527160564  |
| H | 12.49633526788684 | -16.68005995407672 | -0.26622298438746 |
| N | 9.71439651946843  | -10.74608314565878 | 0.83066331282206  |
| H | 10.04803296866837 | -10.10723508693988 | 0.12649760811668  |
| C | 9.53214325863271  | -10.46019940841994 | 2.15311611556051  |
| C | 9.39768447192472  | -12.04132860059300 | 0.65005104614693  |
| H | 9.43119180234279  | -12.54810613346919 | -0.29358173377493 |
| N | 9.02540626193854  | -12.59196270396258 | 1.78200765041849  |
| C | 9.10009982674182  | -11.61612238300591 | 2.73309371186728  |
| H | 8.84278946253152  | -11.79788449728682 | 3.75840461221976  |
| C | 4.52097351955095  | -11.40337666204300 | 6.41883717220939  |
| H | 3.66742654094525  | -11.98016385144635 | 6.76346749649644  |
| H | 5.25625337035527  | -11.28998418751880 | 7.21052008289591  |
| C | 5.15702835834376  | -12.08009820453852 | 5.20555166249592  |
| O | 4.36834290241815  | -12.66173340968262 | 4.42140769323290  |
| O | 6.39443190047865  | -12.00763872773938 | 5.06621596543495  |
| S | 8.15780538377595  | -14.48670011386626 | 1.94178213605755  |
| S | 4.71513335326998  | -13.60785336095005 | 2.61707632186860  |
| O | 6.65587342319275  | -13.81840933159196 | 3.16188425603390  |
| H | 6.74840348720303  | -13.06607143398037 | 3.79366877035614  |
| O | 7.34360908754763  | -16.13581895050520 | 2.81508581094009  |
| N | 7.05250959012418  | -15.00030263887496 | 5.32890808788464  |
| H | 7.03642071326016  | -13.98946854068224 | 5.35032851564006  |
| N | 4.75172145218764  | -15.43678938210762 | 3.55842413486343  |
| H | 4.49297821784906  | -16.17280745959276 | 2.90585748859752  |
| H | 4.17905331675700  | -15.51873199063617 | 4.39363834537723  |
| P | 6.43285331127545  | -15.72084410469366 | 3.94090469544042  |
| C | 6.93602704609953  | -15.52272351445647 | 6.67361429141390  |
| H | 7.73268021637756  | -15.06100236371831 | 7.26617369156567  |
| H | 7.11970197510029  | -16.59914993356862 | 6.66708234184427  |
| C | 5.58502972538843  | -15.21296297020345 | 7.32317802854934  |
| H | 5.41758370011475  | -14.13447115365919 | 7.28478017290734  |
| H | 4.78489669665189  | -15.68834232052275 | 6.74719746880406  |
| C | 5.51859962809345  | -15.68747357196884 | 8.77228612554099  |
| H | 6.32080066000636  | -15.21349740083922 | 9.34125842689894  |

|   |                   |                    |                   |
|---|-------------------|--------------------|-------------------|
| H | 5.68166838074612  | -16.76725274694103 | 8.80935006201852  |
| C | 4.17723685049196  | -15.35310573315514 | 9.41331802887895  |
| H | 4.15215927644580  | -15.69611814561214 | 10.44425040515704 |
| H | 4.00844999099460  | -14.27867338071962 | 9.40550128537445  |
| H | 3.36280669622021  | -15.83200020065182 | 8.87359658109794  |
| N | 6.08902734994002  | -17.31257879034232 | 4.51408335251557  |
| H | 6.90279169280543  | -17.90573302167953 | 4.50283752357208  |
| H | 5.59717430921406  | -17.41698097014106 | 5.38771133435517  |
| H | 4.17351937718983  | -10.41708122467051 | 6.11768632926720  |
| H | 6.70372172122657  | -17.17770491998971 | -2.04256787677854 |
| H | 11.44450297186182 | -14.39175463104106 | 0.82113145040791  |
| H | 9.72816580048205  | -9.49299130846765  | 2.56656761059987  |
| H | -0.42980440240488 | -12.56479542371259 | 2.65755899764005  |
| H | 5.33808765356702  | -9.70482452600552  | -0.81659243430592 |

<sup>3</sup>TS<sub>SQM</sub>

|   |                   |                    |                   |
|---|-------------------|--------------------|-------------------|
| N | 6.02361774957662  | -9.83890536852777  | 1.88900538464580  |
| H | 6.48793383118356  | -9.02831627088611  | 2.26511478814024  |
| C | 5.53263421193518  | -9.96918515583763  | 0.62090935079593  |
| C | 5.72215012510341  | -10.96716237014585 | 2.55942579596654  |
| H | 5.98838877021438  | -11.16015104857656 | 3.58264918532800  |
| N | 5.06845528415012  | -11.80033496605797 | 1.78594402792760  |
| C | 4.94274091532725  | -11.19655066306090 | 0.57203367214954  |
| H | 4.44721585167749  | -11.68111925516795 | -0.24429847656015 |
| N | 0.67052517040453  | -13.87154596395152 | 0.56433229065355  |
| H | 0.03731592096518  | -14.18368657062862 | -0.15407061095275 |
| C | 0.35261247412260  | -13.05536637476627 | 1.61109799783029  |
| C | 1.97701204406442  | -14.17646333129209 | 0.67317372735672  |
| H | 2.51834503265692  | -14.79801741308544 | -0.01090050279904 |
| N | 2.50363541826746  | -13.59845300675459 | 1.72573115186341  |
| C | 1.50343614024170  | -12.89353216621801 | 2.32306489405626  |
| H | 1.68314729700715  | -12.33646196231074 | 3.21899180448843  |
| C | 7.03068850561978  | -15.71969464650371 | -2.22827235072633 |
| H | 7.93801732140682  | -15.54427899142155 | -1.65298255433030 |
| H | 7.05588970088411  | -15.10558771224994 | -3.13288084097033 |
| N | 5.91604728668833  | -15.37206028085628 | -1.38736908307921 |
| H | 4.98512010714329  | -15.54959680753201 | -1.72698167609064 |
| C | 6.02950533720706  | -14.73485364062596 | -0.17878140961387 |
| O | 4.95337842153809  | -14.49254731685404 | 0.40853104118536  |
| O | 7.20215278321338  | -14.42801093595492 | 0.18350275196055  |
| N | 9.66155190892763  | -15.66542738214811 | 1.30730621567410  |
| C | 10.90238491980842 | -15.27249591228298 | 0.90090705268340  |
| C | 9.51633566725852  | -16.91025197951884 | 0.90499271256845  |

---

|    |                   |                    |                   |
|----|-------------------|--------------------|-------------------|
| H  | 8.64148844215817  | -17.50712769104219 | 1.08066039356445  |
| N  | 10.61769252778752 | -17.33325365952520 | 0.26110616250934  |
| H  | 10.76387339762246 | -18.24687399778725 | -0.13757042987273 |
| C  | 11.51111497141566 | -16.30383050364963 | 0.24965254838761  |
| H  | 12.47766359996264 | -16.38286180973452 | -0.20280061212074 |
| N  | 9.43771176395968  | -10.79430458058417 | 1.57195365838648  |
| H  | 9.79153161461925  | -10.05575488386807 | 0.98481847113078  |
| C  | 9.17322974693627  | -10.70252019440049 | 2.90832835517590  |
| C  | 9.16471343104659  | -12.05544664685235 | 1.19218114076622  |
| H  | 9.26331219819140  | -12.42479532431345 | 0.19077455164077  |
| N  | 8.74556900892108  | -12.76833135582095 | 2.21235931636337  |
| C  | 8.73927086823113  | -11.93647927802097 | 3.29358414860871  |
| H  | 8.40668044760241  | -12.26081629814678 | 4.25998742371464  |
| C  | 3.67836289122353  | -12.11719332674264 | 6.41222415749493  |
| H  | 2.87105240855176  | -12.82084757063046 | 6.59294699227879  |
| H  | 4.30814223175175  | -12.02136692795530 | 7.29160289827649  |
| C  | 4.51853127213378  | -12.57099801693670 | 5.21072598173815  |
| O  | 3.85508063136716  | -13.08146938397974 | 4.26762588439948  |
| O  | 5.74302364285874  | -12.40896640209830 | 5.24357745081223  |
| Ni | 7.95032412090277  | -14.68343030195483 | 2.03950605630023  |
| Ni | 4.51846670050775  | -13.72684490748478 | 2.34342293918601  |
| O  | 6.33039570478918  | -14.22829865578759 | 3.22697695548873  |
| H  | 6.53450822388338  | -14.10622187429472 | 4.50806190678959  |
| O  | 7.12064882765011  | -16.46384506801762 | 2.68911228985179  |
| N  | 6.74867230168082  | -15.13142196442954 | 5.26109563013236  |
| H  | 7.75548378615649  | -15.27671075076612 | 5.30995188627806  |
| N  | 4.41681156705946  | -15.73850676333652 | 3.16771966978199  |
| H  | 4.03219186159167  | -16.62456160683172 | 2.85764573586583  |
| H  | 3.88758805245604  | -15.41236276151744 | 3.97538973185835  |
| P  | 6.09305346683316  | -15.91420927352328 | 3.64281207859326  |
| C  | 6.15440978684233  | -15.27867046287899 | 6.57795320489976  |
| H  | 6.26507360183713  | -16.30718763485505 | 6.95045881056847  |
| H  | 5.08634416597466  | -15.05960321868510 | 6.48935692536532  |
| C  | 6.79023654743815  | -14.30304631906492 | 7.56698574679504  |
| H  | 7.85385085706414  | -14.53563125537729 | 7.67231868732957  |
| H  | 6.70075857220620  | -13.29657374802693 | 7.15427248690450  |
| C  | 6.12157687786911  | -14.36490169545235 | 8.93772338459660  |
| H  | 6.21558838806288  | -15.37437894708494 | 9.34527505740391  |
| H  | 5.05558763746909  | -14.15015382888832 | 8.82922382110238  |
| C  | 6.74339875022124  | -13.36704343548606 | 9.90657172399204  |
| H  | 6.24990085983857  | -13.41525331220927 | 10.87384067627977 |
| H  | 7.80083041622608  | -13.58192598647208 | 10.05131755855879 |
| H  | 6.65006936948648  | -12.35414933571818 | 9.52194358621046  |

|   |                   |                    |                   |
|---|-------------------|--------------------|-------------------|
| N | 5.71270943346421  | -17.42859876999788 | 4.43174942940084  |
| H | 6.52366973205132  | -17.98919494736673 | 4.63655805861167  |
| H | 5.08923248908229  | -17.42007521500248 | 5.22365805125135  |
| H | 3.24453562383232  | -11.14781183285901 | 6.17827163780094  |
| H | 6.97562121855881  | -16.77134593397701 | -2.51680661248386 |
| H | 11.27929606249089 | -14.29223582174148 | 1.10907686669520  |
| H | 9.32211313143808  | -9.80091094614788  | 3.46512698767029  |
| H | -0.63373739796761 | -12.66881818200587 | 1.75965525357445  |
| H | 5.63400476006832  | -9.20166713745247  | -0.11779088606007 |

**<sup>3</sup>PS<sub>SQM</sub>**

|   |                   |                    |                   |
|---|-------------------|--------------------|-------------------|
| N | 4.24643726329483  | -9.75016704281258  | 2.73564325424833  |
| H | 3.95729220042815  | -8.91262639792327  | 3.21510663288295  |
| C | 5.46584855178912  | -9.97108091371095  | 2.16428039200285  |
| C | 3.51828076722386  | -10.86696748613909 | 2.58073187662549  |
| H | 2.51258314721038  | -10.98330086004716 | 2.93211994712626  |
| N | 4.20536887847248  | -11.78214460073787 | 1.93513186714840  |
| C | 5.42780929947101  | -11.24105747199515 | 1.66988822239866  |
| H | 6.18998731273031  | -11.80103015960843 | 1.16352654575077  |
| N | 0.84691198662944  | -13.33724247207636 | -1.20179327491446 |
| H | 0.58149928253990  | -13.15675149264822 | -2.15703048062410 |
| C | -0.00647402625578 | -13.62693942774472 | -0.17687059904459 |
| C | 2.09511142500315  | -13.33221848887963 | -0.69959911490163 |
| H | 2.98110585972577  | -13.13762774226041 | -1.26925992698902 |
| N | 2.08041558916628  | -13.60471296364296 | 0.58368909365380  |
| C | 0.77533486136033  | -13.79165312480895 | 0.92756387107299  |
| H | 0.50123868700537  | -14.01854357106879 | 1.93754536586781  |
| C | 7.88161488382522  | -15.05662126343590 | -1.70954221727771 |
| H | 8.53177628030132  | -14.92503389141145 | -0.84613433706706 |
| H | 8.13567769661439  | -14.30596381850638 | -2.46341104094756 |
| N | 6.52366247830025  | -14.91362746166750 | -1.25290532313367 |
| H | 5.78432867235576  | -14.99734950345792 | -1.93276939614842 |
| C | 6.17870085688695  | -14.35385094174848 | -0.04476803136588 |
| O | 4.95510514013457  | -14.14920313561431 | 0.12204031319750  |
| O | 7.12925708472072  | -14.07901114210246 | 0.74171620835889  |
| N | 9.01012272143610  | -15.78455966744544 | 2.49275697882490  |
| C | 10.25948180569645 | -15.74735143854030 | 3.03924155142919  |
| C | 9.02745705405834  | -16.75091038225136 | 1.59832915614119  |
| H | 8.18235180047765  | -17.04346076326225 | 1.00469981563995  |
| N | 10.23599057683993 | -17.33455172154115 | 1.55213996292295  |
| H | 10.50705794637423 | -18.10285585207540 | 0.95897531956187  |
| C | 11.03374037517033 | -16.70950575131880 | 2.46325622820160  |
| H | 12.05352482844286 | -16.98773069628344 | 2.62747975117792  |

---

|    |                   |                    |                   |
|----|-------------------|--------------------|-------------------|
| N  | 8.85378457891841  | -11.10384041787781 | 4.05770924249964  |
| H  | 9.58947498244978  | -10.41982425201794 | 4.13772796305828  |
| C  | 7.60213005540317  | -11.00578420194468 | 4.59288634156427  |
| C  | 8.92385449151109  | -12.27929348088219 | 3.41129636445623  |
| H  | 9.79121440091852  | -12.62292435521024 | 2.88354794569880  |
| N  | 7.78906608017352  | -12.93628148100069 | 3.51492039020953  |
| C  | 6.94410849072491  | -12.14846995668292 | 4.24668738165278  |
| H  | 5.92291749035882  | -12.42820029861084 | 4.44614503881179  |
| C  | 2.14714006077023  | -13.98741930879605 | 5.80890570581996  |
| H  | 2.46108107091878  | -15.02238835578316 | 5.92182523735998  |
| H  | 2.37591586200197  | -13.43117696146947 | 6.71259217248272  |
| C  | 2.91715015692000  | -13.38992756743498 | 4.62082124461271  |
| O  | 2.49889030551454  | -13.78596439225724 | 3.49229434338149  |
| O  | 3.83374632183232  | -12.60205905590486 | 4.83209828916947  |
| Ni | 7.20235966170581  | -14.74472055428419 | 2.66882837826292  |
| Ni | 3.74044255395909  | -13.79099788211522 | 1.83605604632691  |
| O  | 5.21152659635029  | -14.44172796334369 | 3.16095247569753  |
| H  | 6.19330328294368  | -14.53618624625521 | 5.63053425722263  |
| O  | 6.12304619434604  | -16.58922479610771 | 2.28289046590732  |
| N  | 6.72565703738241  | -15.40229083491245 | 5.60915248603982  |
| H  | 7.14871014392285  | -15.49227298556881 | 4.67523688901132  |
| N  | 3.56249357483801  | -16.02559440892164 | 1.88326060365964  |
| H  | 3.71488285497948  | -16.55875930663461 | 1.03789449469138  |
| H  | 2.72392697046998  | -16.30753121118568 | 2.37539587002238  |
| P  | 4.92429064173935  | -15.91455841868564 | 2.89954473180879  |
| C  | 7.75804386436277  | -15.38825944457385 | 6.62940763972662  |
| H  | 8.31240294129586  | -16.32832102240509 | 6.55549816011607  |
| H  | 7.25839742179899  | -15.36465523402060 | 7.60189168645201  |
| C  | 8.72646732391412  | -14.20701254009607 | 6.51868346517160  |
| H  | 9.13536082915625  | -14.19478277036972 | 5.50333666180444  |
| H  | 8.16896544799754  | -13.27766941079213 | 6.66377400511893  |
| C  | 9.86786094001434  | -14.27803074179888 | 7.52822747401961  |
| H  | 10.42147324459911 | -15.20845671685286 | 7.38547482282195  |
| H  | 9.45659470507416  | -14.28965225489187 | 8.53894280367154  |
| C  | 10.81695698030774 | -13.09425459097340 | 7.38190684835762  |
| H  | 11.62200942938067 | -13.15860613341798 | 8.10891456224776  |
| H  | 11.25611850717680 | -13.07494970417063 | 6.38584852159952  |
| H  | 10.28566370662881 | -12.15850781989959 | 7.54227486850234  |
| N  | 4.36172969357545  | -16.63375776934553 | 4.30915551916138  |
| H  | 4.92603771527700  | -16.34174923843470 | 5.10282890532166  |
| H  | 4.38780998299098  | -17.64132827367240 | 4.24266118070822  |
| H  | 1.08070700716210  | -13.96393000007507 | 5.60544570682703  |
| H  | 8.02977040612765  | -16.04960881154514 | -2.13824687400760 |

---

|   |                   |                    |                   |
|---|-------------------|--------------------|-------------------|
| H | 10.52373368007490 | -15.05022449900098 | 3.80790066262256  |
| H | 7.28735163558260  | -10.16150706435895 | 5.16913561576647  |
| H | -1.06577082248601 | -13.69233162191757 | -0.31158019354716 |
| H | 6.23490940150342  | -9.22737725672706  | 2.14791478628799  |
